# Supplementary material for: Clay minerals identification in rock varnish by XRD: A one-step reduction approach
Source: PubMed Central journal article supplement — MethodsX. 2021 Sep 6;8:101511. doi: 10.1016/j.mex.2021.101511 (PMC8563653; doi:10.1016/j.mex.2021.101511), 2021-09-06
Supplement: mmc1.pdf [file mmc1.pdf]

phy

Author: sk  
Creation: 2/3/2021  
Sample Name: s1

**Area 900**

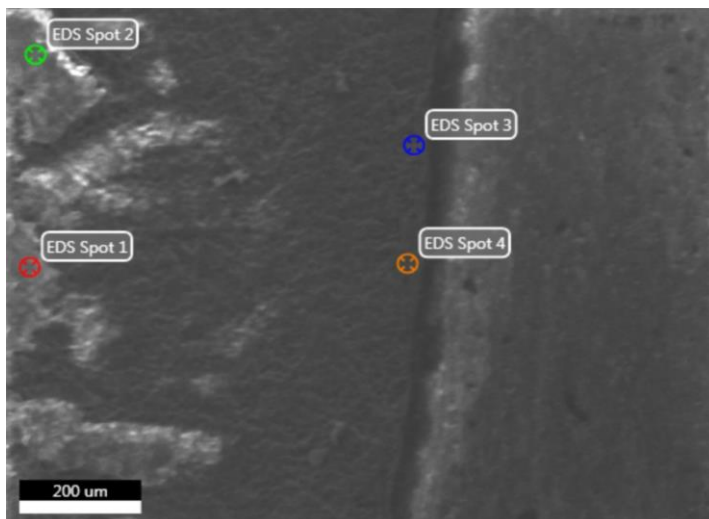

Notes:

EDS Spot 1

kV: 20      Mag: 60      Takeoff: 76      Live Time(s): 49.4      Amp Time(μs): 1.92      Resolution:(eV)134.9

EDS Spot 1

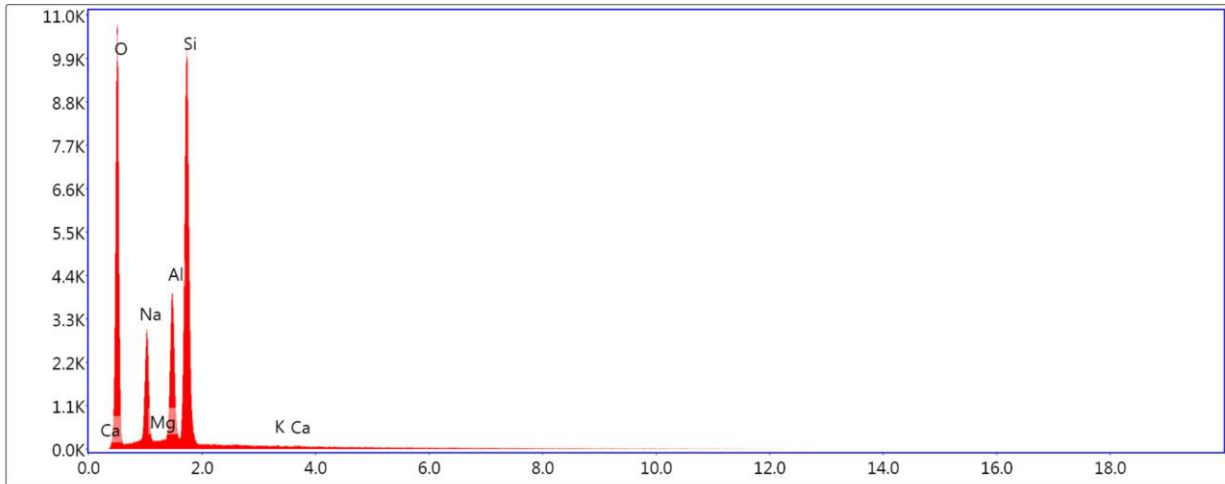

Lsec: 49.4 0 Cnts 0.000 keV Det: Octane Plus Det

**eZAF Smart Quant Results**

| Element | Weight % | Atomic % | Net Int. | Error % | Kratio | Z      | R      | A      | F      |
|---------|----------|----------|----------|---------|--------|--------|--------|--------|--------|
| O K     | 51.96    | 64.02    | 1535.80  | 7.03    | 0.2307 | 1.0460 | 0.9798 | 0.4245 | 1.0000 |
| NaK     | 12.71    | 10.90    | 476.36   | 7.72    | 0.0493 | 0.9504 | 1.0053 | 0.4060 | 1.0053 |
| MgK     | 0.24     | 0.19     | 13.02    | 23.14   | 0.0011 | 0.9667 | 1.0127 | 0.4638 | 1.0100 |
| AlK     | 9.91     | 7.24     | 700.44   | 5.54    | 0.0570 | 0.9310 | 1.0196 | 0.6105 | 1.0120 |
| SiK     | 25.05    | 17.58    | 1863.90  | 4.82    | 0.1554 | 0.9514 | 1.0261 | 0.6500 | 1.0026 |
| K K     | 0.05     | 0.03     | 2.99     | 59.89   | 0.0004 | 0.8820 | 1.0533 | 0.8976 | 1.0178 |
| CaK     | 0.07     | 0.04     | 3.97     | 58.05   | 0.0006 | 0.8981 | 1.0578 | 0.9337 | 1.0235 |

EDS Spot 2

kV: 20      Mag: 60      Takeoff: 76      Live Time(s): 49.5      Amp Time(μs): 1.92      Resolution:(eV)134.9

EDS Spot 2

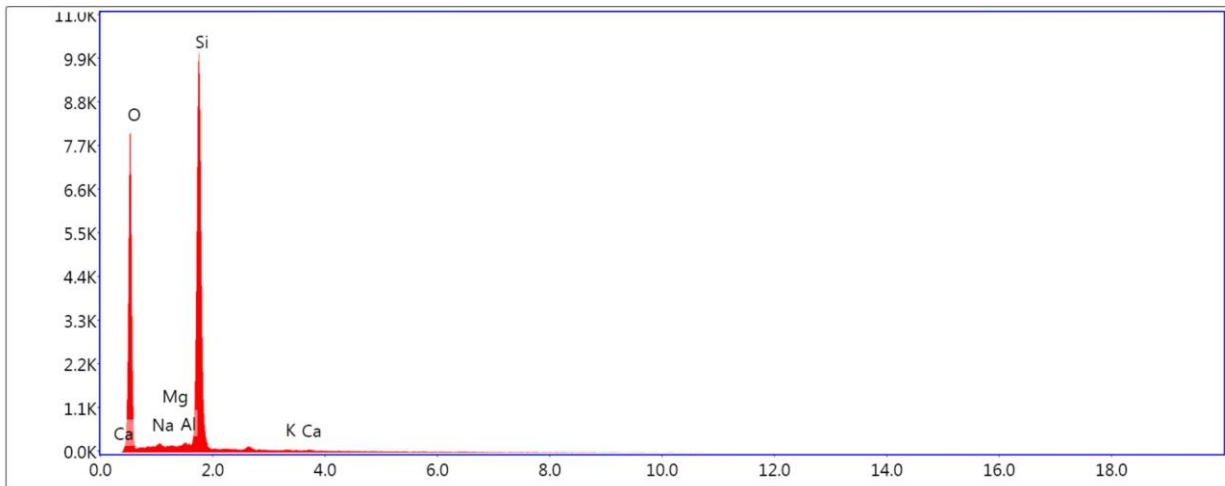

Lsec: 49.5 0 Cnts 0.000 keV Det: Octane Plus Det

**eZAF Smart Quant Results**

| Element | Weight % | Atomic % | Net Int. | Error % | Kratio | Z      | R      | A      | F      |
|---------|----------|----------|----------|---------|--------|--------|--------|--------|--------|
| O K     | 62.10    | 73.98    | 1153.76  | 7.10    | 0.2718 | 1.0342 | 0.9816 | 0.4233 | 1.0000 |
| NaK     | 2.19     | 1.81     | 45.50    | 11.32   | 0.0074 | 0.9396 | 1.0069 | 0.3569 | 1.0066 |
| MgK     | 0.75     | 0.59     | 28.42    | 12.83   | 0.0037 | 0.9557 | 1.0142 | 0.5054 | 1.0124 |
| AlK     | 0.97     | 0.69     | 46.90    | 8.88    | 0.0060 | 0.9204 | 1.0211 | 0.6529 | 1.0222 |
| SiK     | 33.33    | 22.62    | 1850.20  | 3.63    | 0.2418 | 0.9406 | 1.0275 | 0.7693 | 1.0028 |
| K K     | 0.35     | 0.17     | 13.49    | 21.24   | 0.0028 | 0.8719 | 1.0545 | 0.9044 | 1.0184 |
| CaK     | 0.31     | 0.15     | 10.45    | 21.44   | 0.0027 | 0.8878 | 1.0589 | 0.9375 | 1.0232 |

EDS Spot 3

kV: 20      Mag: 60      Takeoff: 76      Live Time(s): 49.6      Amp Time(μs): 1.92      Resolution:(eV)134.9

EDS Spot 3

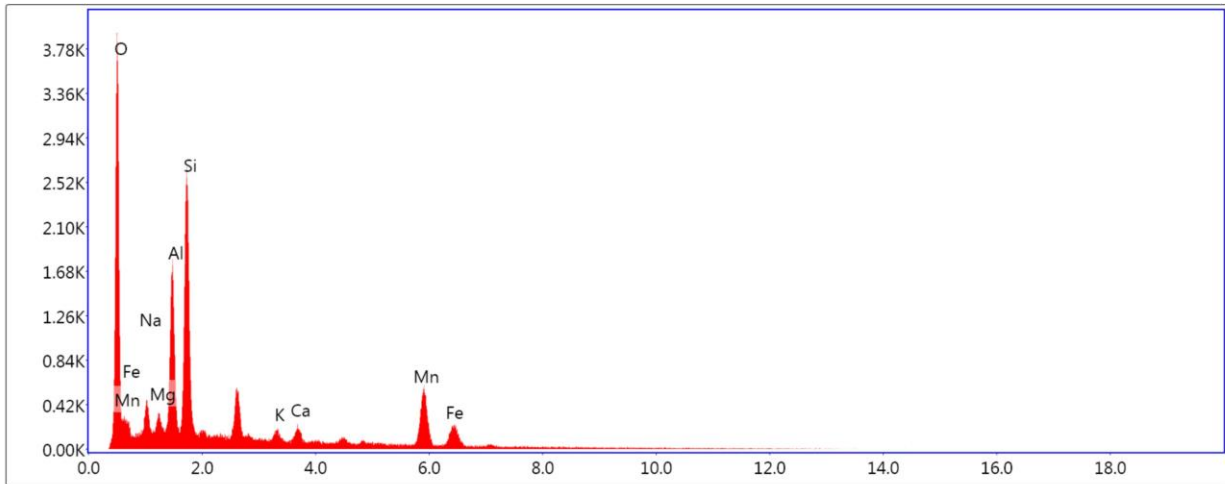

Lsec: 49.6 0 Cnts 0.000 keV Det: Octane Plus Det

**eZAF Smart Quant Results**

| Element | Weight % | Atomic % | Net Int. | Error % | Kratio | Z      | R      | A      | F      |
|---------|----------|----------|----------|---------|--------|--------|--------|--------|--------|
| O K     | 47.05    | 64.20    | 540.51   | 7.55    | 0.2052 | 1.0753 | 0.9622 | 0.4056 | 1.0000 |
| NaK     | 4.80     | 4.55     | 54.78    | 12.37   | 0.0143 | 0.9784 | 0.9892 | 0.3041 | 1.0041 |
| MgK     | 1.68     | 1.50     | 34.41    | 13.34   | 0.0071 | 0.9956 | 0.9971 | 0.4236 | 1.0073 |
| AlK     | 11.03    | 8.92     | 289.23   | 6.58    | 0.0595 | 0.9591 | 1.0045 | 0.5580 | 1.0084 |
| SiK     | 16.72    | 12.99    | 471.05   | 5.81    | 0.0992 | 0.9804 | 1.0114 | 0.6023 | 1.0049 |
| K K     | 1.13     | 0.63     | 28.50    | 11.49   | 0.0097 | 0.9101 | 1.0409 | 0.9063 | 1.0389 |
| CaK     | 1.52     | 0.83     | 33.84    | 12.90   | 0.0138 | 0.9269 | 1.0458 | 0.9352 | 1.0491 |
| MnK     | 12.60    | 5.01     | 154.86   | 3.44    | 0.1080 | 0.8145 | 1.0651 | 1.0005 | 1.0520 |
| FeK     | 3.48     | 1.36     | 37.82    | 9.66    | 0.0305 | 0.8273 | 1.0675 | 1.0022 | 1.0550 |

EDS Spot 4

kV: 20      Mag: 60      Takeoff: 76      Live Time(s): 49.6      Amp Time(μs): 1.92      Resolution:(eV)134.9

EDS Spot 4

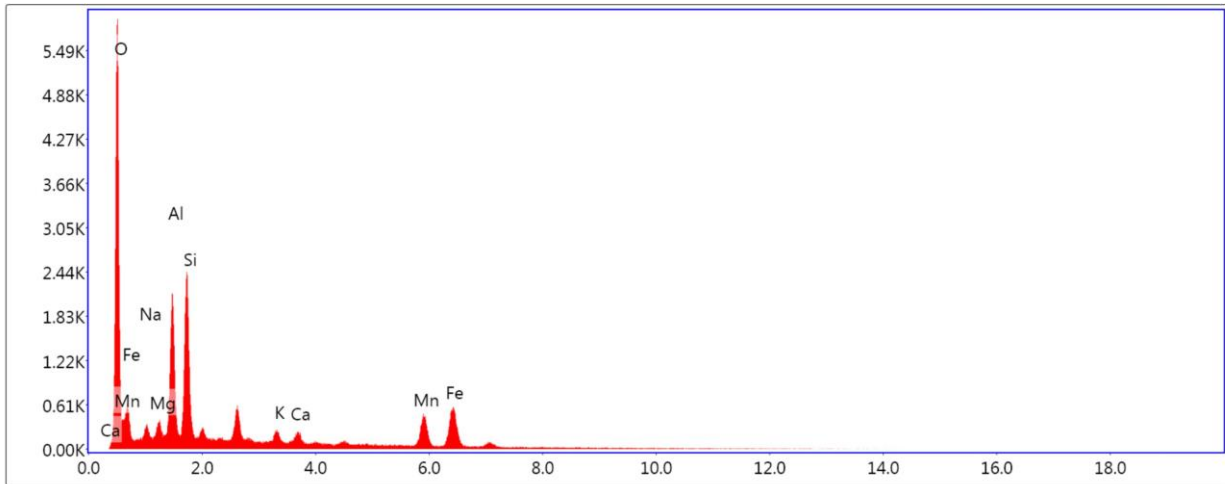

Lsec: 49.6 0 Cnts 0.000 keV Det: Octane Plus Det

**eZAF Smart Quant Results**

| Element | Weight % | Atomic % | Net Int. | Error % | Kratio | Z      | R      | A      | F      |
|---------|----------|----------|----------|---------|--------|--------|--------|--------|--------|
| O K     | 54.07    | 71.94    | 821.11   | 6.91    | 0.2645 | 1.0705 | 0.9628 | 0.4570 | 1.0000 |
| NaK     | 1.23     | 1.14     | 14.70    | 24.53   | 0.0033 | 0.9740 | 0.9897 | 0.2712 | 1.0036 |
| MgK     | 0.89     | 0.77     | 20.52    | 17.93   | 0.0036 | 0.9911 | 0.9976 | 0.4081 | 1.0066 |
| AlK     | 10.91    | 8.61     | 330.88   | 6.70    | 0.0578 | 0.9548 | 1.0049 | 0.5505 | 1.0072 |
| SiK     | 12.31    | 9.33     | 404.54   | 6.03    | 0.0723 | 0.9761 | 1.0119 | 0.5984 | 1.0053 |
| K K     | 0.90     | 0.49     | 27.16    | 11.11   | 0.0078 | 0.9061 | 1.0413 | 0.9190 | 1.0428 |
| CaK     | 1.08     | 0.57     | 28.76    | 11.17   | 0.0100 | 0.9228 | 1.0462 | 0.9461 | 1.0563 |
| MnK     | 7.94     | 3.07     | 116.73   | 4.30    | 0.0691 | 0.8109 | 1.0654 | 1.0042 | 1.0692 |
| FeK     | 10.67    | 4.07     | 135.88   | 4.26    | 0.0929 | 0.8237 | 1.0678 | 1.0059 | 1.0506 |
