# Supplementary material for: Clay minerals identification in rock varnish by XRD: A one-step reduction approach
Source: PubMed Central journal article supplement — MethodsX. 2021 Sep 6;8:101511. doi: 10.1016/j.mex.2021.101511 (PMC8563653; doi:10.1016/j.mex.2021.101511), 2021-09-06
Supplement: mmc2.pdf [file mmc2.pdf]

phy

Author: sk  
Creation: 5/18/2020  
Sample Name: s1

**Area 822**

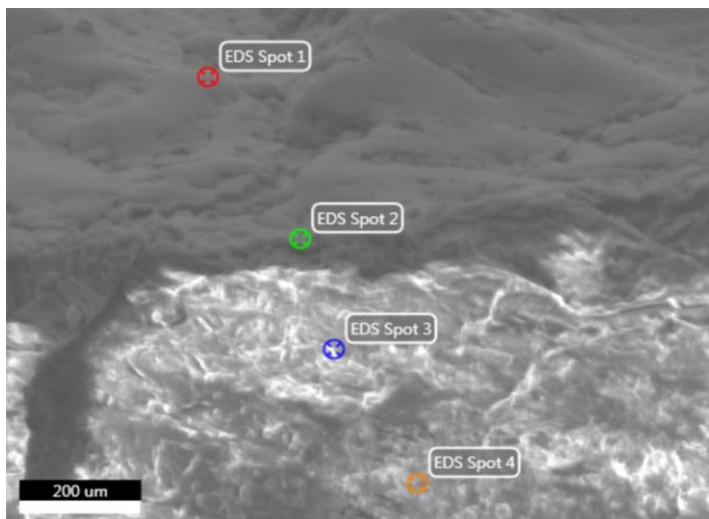

Notes:

EDS Spot 1

kV: 20      Mag: 60      Takeoff: 76      Live Time(s): 50      Amp Time(μs): 1.92      Resolution:(eV)134.9

EDS Spot 1

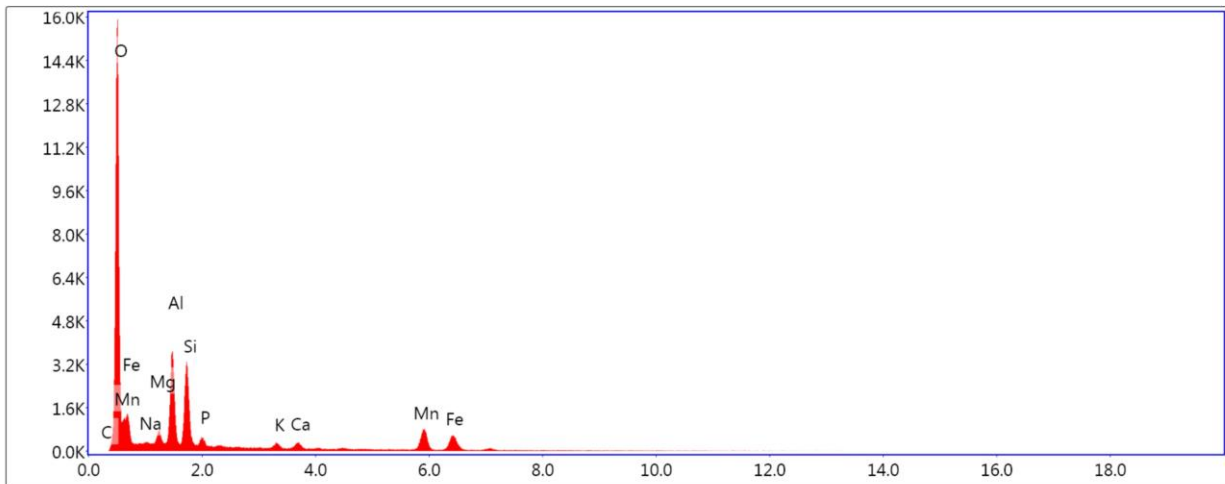

Lsec: 50.0 0 Cnts 0.000 keV Det: Octane Plus Det

**eZAF Smart Quant Results**

| Element | Weight % | Atomic % | Net Int. | Error % | Kratio | Z      | R      | A      | F      |
|---------|----------|----------|----------|---------|--------|--------|--------|--------|--------|
| C K     | 0.00     | 0.01     | 0.02     | 99.99   | 0.0000 | 1.0967 | 0.9526 | 0.1962 | 1.0000 |
| O K     | 63.76    | 78.14    | 2250.63  | 6.11    | 0.3418 | 1.0506 | 0.9741 | 0.5103 | 1.0000 |
| NaK     | 2.01     | 1.71     | 52.61    | 12.50   | 0.0055 | 0.9552 | 1.0001 | 0.2863 | 1.0037 |
| MgK     | 2.13     | 1.72     | 106.67   | 9.12    | 0.0088 | 0.9717 | 1.0077 | 0.4240 | 1.0062 |
| AlK     | 9.84     | 7.15     | 628.60   | 6.19    | 0.0517 | 0.9359 | 1.0147 | 0.5581 | 1.0064 |
| SiK     | 8.16     | 5.70     | 570.68   | 5.70    | 0.0481 | 0.9566 | 1.0214 | 0.6126 | 1.0055 |
| P K     | 1.23     | 0.78     | 74.59    | 7.31    | 0.0075 | 0.9189 | 1.0276 | 0.6648 | 1.0080 |
| K K     | 0.72     | 0.36     | 45.74    | 9.11    | 0.0062 | 0.8874 | 1.0494 | 0.9342 | 1.0382 |
| CaK     | 0.97     | 0.48     | 53.99    | 11.39   | 0.0088 | 0.9036 | 1.0540 | 0.9589 | 1.0488 |
| MnK     | 6.73     | 2.40     | 206.68   | 3.50    | 0.0577 | 0.7936 | 1.0717 | 1.0082 | 1.0704 |
| FeK     | 4.45     | 1.56     | 119.71   | 4.66    | 0.0386 | 0.8060 | 1.0738 | 1.0093 | 1.0655 |

EDS Spot 2

kV: 20      Mag: 60      Takeoff: 76      Live Time(s): 50      Amp Time(μs): 1.92      Resolution:(eV)134.9

EDS Spot 2

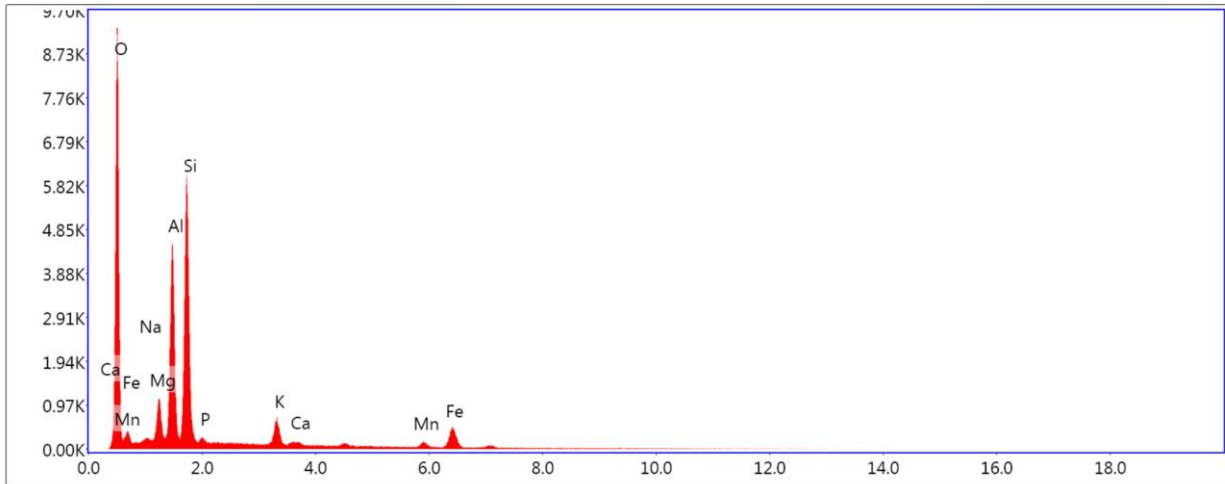

Lsec: 50.0 0 Cnts 0.000 keV Det: Octane Plus Det

**eZAF Smart Quant Results**

| Element | Weight % | Atomic % | Net Int. | Error % | Kratio | Z      | R      | A      | F      |
|---------|----------|----------|----------|---------|--------|--------|--------|--------|--------|
| C K     | 0.01     | 0.01     | 0.02     | 99.99   | 0.0000 | 1.0987 | 0.9515 | 0.1541 | 1.0000 |
| O K     | 55.71    | 70.30    | 1293.32  | 7.34    | 0.2330 | 1.0526 | 0.9732 | 0.3973 | 1.0000 |
| NaK     | 0.29     | 0.26     | 7.43     | 47.11   | 0.0009 | 0.9570 | 0.9993 | 0.3296 | 1.0054 |
| MgK     | 3.26     | 2.71     | 159.04   | 7.95    | 0.0156 | 0.9736 | 1.0068 | 0.4878 | 1.0091 |
| AlK     | 13.17    | 9.85     | 777.24   | 5.52    | 0.0759 | 0.9377 | 1.0139 | 0.6089 | 1.0090 |
| SiK     | 17.61    | 12.66    | 1058.13  | 5.29    | 0.1058 | 0.9584 | 1.0206 | 0.6238 | 1.0043 |
| P K     | 0.54     | 0.35     | 25.08    | 20.17   | 0.0030 | 0.9207 | 1.0269 | 0.6061 | 1.0066 |
| K K     | 2.52     | 1.30     | 129.44   | 5.41    | 0.0209 | 0.8890 | 1.0487 | 0.9094 | 1.0248 |
| CaK     | 0.47     | 0.24     | 21.03    | 17.54   | 0.0041 | 0.9053 | 1.0533 | 0.9314 | 1.0326 |
| MnK     | 1.19     | 0.44     | 31.19    | 9.69    | 0.0103 | 0.7949 | 1.0712 | 1.0013 | 1.0917 |
| FeK     | 5.24     | 1.89     | 119.67   | 4.44    | 0.0457 | 0.8073 | 1.0733 | 1.0050 | 1.0758 |

EDS Spot 3

kV: 20      Mag: 60      Takeoff: 76      Live Time(s): 50      Amp Time(μs): 1.92      Resolution:(eV)134.9

EDS Spot 3

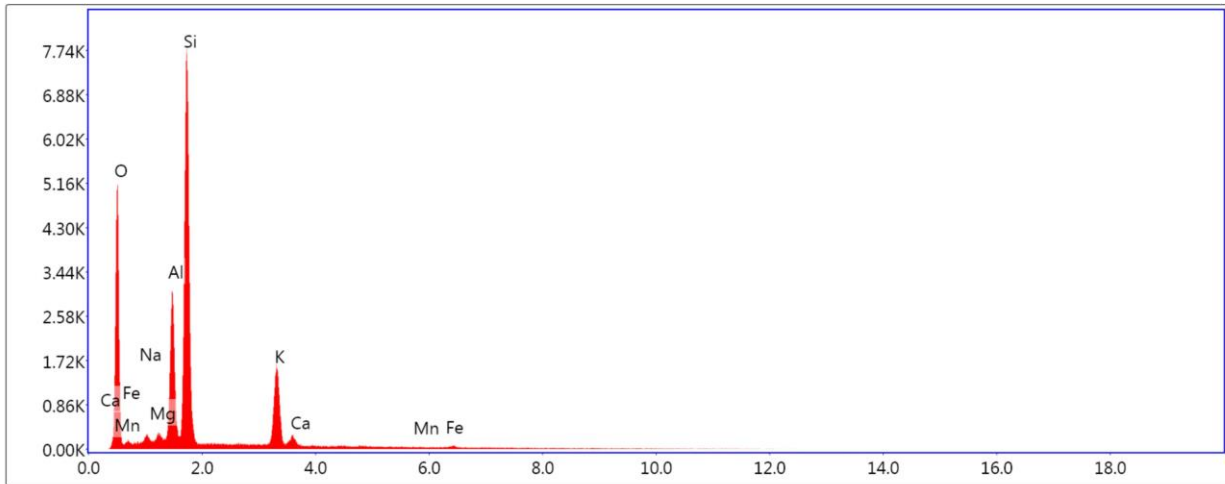

Lsec: 50.0 0 Cnts 0.000 keV Det: Octane Plus Det

**eZAF Smart Quant Results**

| Element | Weight % | Atomic % | Net Int. | Error % | Kratio | Z      | R      | A      | F      |
|---------|----------|----------|----------|---------|--------|--------|--------|--------|--------|
| C K     | 0.01     | 0.01     | 0.02     | 99.99   | 0.0000 | 1.0979 | 0.9516 | 0.1464 | 1.0000 |
| O K     | 52.40    | 66.99    | 706.32   | 8.60    | 0.1605 | 1.0518 | 0.9732 | 0.2912 | 1.0000 |
| NaK     | 0.83     | 0.74     | 18.55    | 17.63   | 0.0029 | 0.9562 | 0.9993 | 0.3639 | 1.0064 |
| MgK     | 0.58     | 0.49     | 24.21    | 14.59   | 0.0030 | 0.9727 | 1.0069 | 0.5236 | 1.0119 |
| AlK     | 10.00    | 7.58     | 518.04   | 5.18    | 0.0638 | 0.9368 | 1.0139 | 0.6713 | 1.0147 |
| SiK     | 26.19    | 19.08    | 1388.72  | 4.47    | 0.1751 | 0.9575 | 1.0206 | 0.6946 | 1.0048 |
| K K     | 8.91     | 4.66     | 357.64   | 3.20    | 0.0727 | 0.8881 | 1.0487 | 0.9053 | 1.0150 |
| CaK     | 0.36     | 0.18     | 12.15    | 27.28   | 0.0030 | 0.9043 | 1.0534 | 0.8998 | 1.0191 |
| MnK     | 0.18     | 0.07     | 3.58     | 58.36   | 0.0015 | 0.7940 | 1.0712 | 0.9920 | 1.0779 |
| FeK     | 0.55     | 0.20     | 10.05    | 25.17   | 0.0048 | 0.8064 | 1.0733 | 0.9979 | 1.0925 |

EDS Spot 4

kV: 20      Mag: 60      Takeoff: 76      Live Time(s): 50      Amp Time(μs): 1.92      Resolution:(eV)134.9

EDS Spot 4

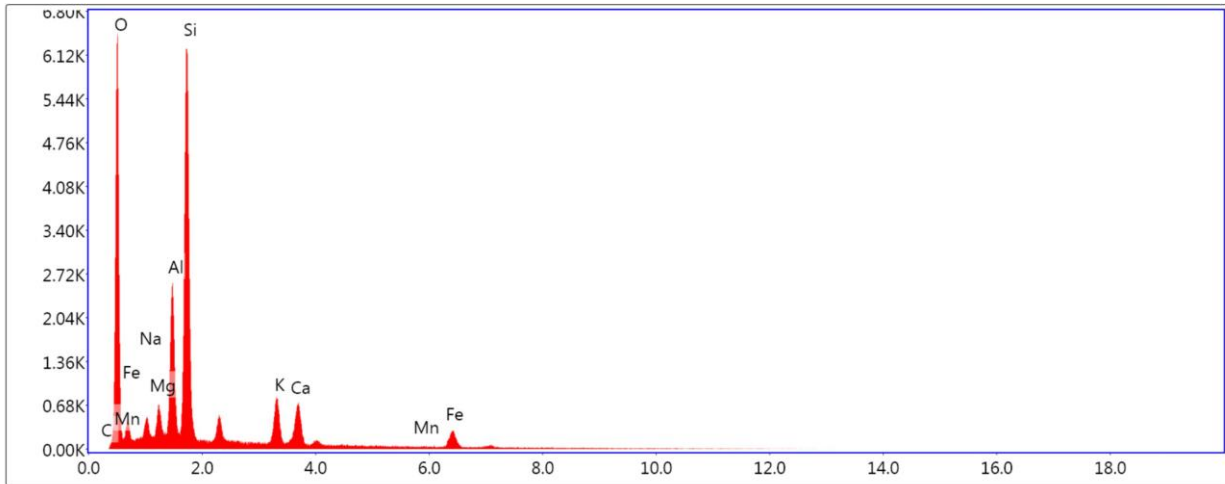

Lsec: 50.0 0 Cnts 0.000 keV Det: Octane Plus Det

**eZAF Smart Quant Results**

| Element | Weight % | Atomic % | Net Int. | Error % | Kratio | Z      | R      | A      | F      |
|---------|----------|----------|----------|---------|--------|--------|--------|--------|--------|
| C K     | 0.01     | 0.01     | 0.02     | 99.99   | 0.0000 | 1.0978 | 0.9509 | 0.1602 | 1.0000 |
| O K     | 54.41    | 69.10    | 887.20   | 8.23    | 0.1846 | 1.0518 | 0.9726 | 0.3226 | 1.0000 |
| NaK     | 2.68     | 2.37     | 60.66    | 11.16   | 0.0087 | 0.9563 | 0.9987 | 0.3374 | 1.0051 |
| MgK     | 2.21     | 1.84     | 91.20    | 8.72    | 0.0103 | 0.9728 | 1.0063 | 0.4779 | 1.0090 |
| AlK     | 8.47     | 6.38     | 433.68   | 5.84    | 0.0489 | 0.9370 | 1.0134 | 0.6093 | 1.0114 |
| SiK     | 20.59    | 14.90    | 1136.82  | 4.86    | 0.1313 | 0.9577 | 1.0201 | 0.6623 | 1.0048 |
| K K     | 3.67     | 1.91     | 164.80   | 4.37    | 0.0307 | 0.8883 | 1.0483 | 0.9142 | 1.0289 |
| CaK     | 4.12     | 2.09     | 158.31   | 4.07    | 0.0355 | 0.9046 | 1.0530 | 0.9298 | 1.0242 |
| MnK     | 0.16     | 0.06     | 3.50     | 59.29   | 0.0013 | 0.7943 | 1.0708 | 0.9951 | 1.0844 |
| FeK     | 3.69     | 1.34     | 72.69    | 5.68    | 0.0321 | 0.8067 | 1.0730 | 1.0003 | 1.0792 |
