# Supplementary material for: Clay minerals identification in rock varnish by XRD: A one-step reduction approach
Source: PubMed Central journal article supplement — MethodsX. 2021 Sep 6;8:101511. doi: 10.1016/j.mex.2021.101511 (PMC8563653; doi:10.1016/j.mex.2021.101511), 2021-09-06
Supplement: mmc3.pdf [file mmc3.pdf]

**Measurement Conditions:** (Bookmark 1)

Dataset Name Rvdth-airdried low angle  
File name I:\xrd methodsx slide\Rvdth-airdried low angle.xrdml  
Comment Configuration=Multi Purpose Sample Stage, Owner=User-1,  
Creation date=3/27/2015 3:44:05 PM  
Goniometer=PW3050/60 (Theta/Theta); Minimum step size  
2Theta:0.001; Minimum step size Omega:0.001  
Sample stage=Multi purpose sample stage; Minimum step size  
Phi:2.5  
Diffractometer system=XPERT-3  
Measurement program=C:\PANalytical\Data  
Collector\Programs\Clay Analysis\_MPSS\_Low Angle scan.xrdmp, Identifier={B6415894-04C1-41CC-B99A-F5B48BD2606C}  
Measurement Date / Time 31-05-2021 13:31:38  
Operator User  
Raw Data Origin XRD measurement (\*.XRDML)  
Scan Axis Gonio  
Start Position [°2Th.] 3.0026  
End Position [°2Th.] 19.9806  
Step Size [°2Th.] 0.0130  
Scan Step Time [s] 48.1950  
Scan Type Continuous  
PSD Mode Scanning  
PSD Length [°2Th.] 3.35  
Offset [°2Th.] 0.0000  
Divergence Slit Type Fixed  
Divergence Slit Size [°] 0.1089  
Specimen Length [mm] 10.00  
Measurement Temperature [°C] 25.00  
Anode Material Cu  
K-Alpha1 [Å] 1.54060  
K-Alpha2 [Å] 1.54443  
K-Beta [Å] 1.39225  
K-A2 / K-A1 Ratio 0.50000  
Generator Settings 40 mA, 45 kV  
Diffractometer Type 0000000011166139  
Diffractometer Number 0  
Goniometer Radius [mm] 240.00  
Dist. Focus-Diverg. Slit [mm] 100.00  
Incident Beam Monochromator No  
Spinning No

---

**Main Graphics, Analyze View:** (Bookmark 2)

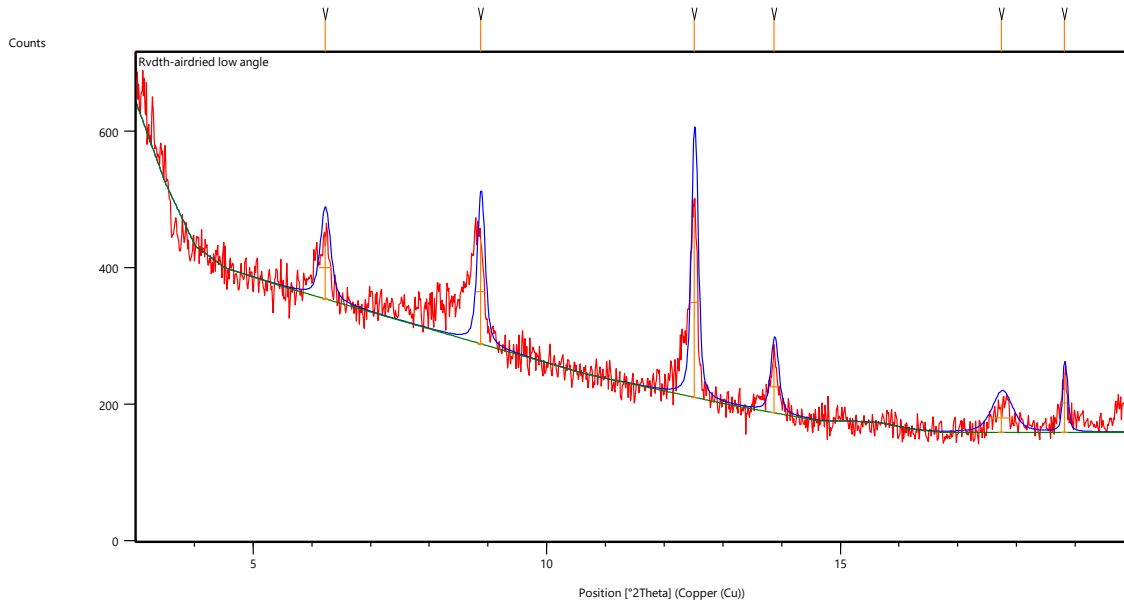

**Peak List:** (Bookmark 3)

| Pos. [°2Th.] | Height [cts] | FWHM Left [°2Th.] | d-spacing [Å] | Rel. Int. [%] |
|--------------|--------------|-------------------|---------------|---------------|
| 6.2278       | 90.94        | 0.2047            | 14.19219      | 32.67         |
| 8.8778       | 152.87       | 0.1535            | 9.96097       | 54.93         |
| 12.5136      | 278.31       | 0.1279            | 7.07381       | 100.00        |
| 13.8739      | 77.46        | 0.1535            | 6.38315       | 27.83         |
| 17.7479      | 41.13        | 0.4093            | 4.99761       | 14.78         |
| 18.8173      | 86.23        | 0.0768            | 4.71592       | 30.98         |

**Pattern List:** (Bookmark 4)

**Document History:** (Bookmark 5)

Insert Measurement:

- File name = "Rvdth-airdried low angle.xrdml"
- Modification time = "03-06-2021 22:53:44"
- Modification editor = "GM"

Default properties:

- Measurement step axis = "None"
- Internal wavelengths used from anode material: Copper (Cu)
- Original K-Alpha1 wavelength = "1.54060"
- Used K-Alpha1 wavelength = "1.54060"
- Original K-Alpha2 wavelength = "1.54443"
- Used K-Alpha2 wavelength = "1.54443"
