# Supplementary material for: Clay minerals identification in rock varnish by XRD: A one-step reduction approach
Source: PubMed Central journal article supplement — MethodsX. 2021 Sep 6;8:101511. doi: 10.1016/j.mex.2021.101511 (PMC8563653; doi:10.1016/j.mex.2021.101511), 2021-09-06
Supplement: mmc4.pdf [file mmc4.pdf]

**Measurement Conditions:** (Bookmark 1)

Dataset Name Rvdth-550H low angle  
File name I:\xrd methodsx slide\Rvdth-550H low angle.xrdml  
Comment Configuration=Multi Purpose Sample Stage, Owner=User-1,  
Creation date=3/27/2015 3:44:05 PM  
Goniometer=PW3050/60 (Theta/Theta); Minimum step size  
2Theta:0.001; Minimum step size Omega:0.001  
Sample stage=Multi purpose sample stage; Minimum step size  
Phi:2.5  
Diffractometer system=XPERT-3  
Measurement program=C:\PANalytical\Data  
Collector\Programs\Clay Analysis\_MPSS\_Low Angle scan.xrdmp, Identifier={C0D22E41-  
CCC3-4C43-A02D-89842CEF78D9}  
Measurement Date / Time 31-05-2021 16:01:40  
Operator User  
Raw Data Origin XRD measurement (\*.XRDML)  
Scan Axis Gonio  
Start Position [°2Th.] 3.0026  
End Position [°2Th.] 19.9806  
Step Size [°2Th.] 0.0130  
Scan Step Time [s] 48.1950  
Scan Type Continuous  
PSD Mode Scanning  
PSD Length [°2Th.] 3.35  
Offset [°2Th.] 0.0000  
Divergence Slit Type Fixed  
Divergence Slit Size [°] 0.1089  
Specimen Length [mm] 10.00  
Measurement Temperature [°C] 25.00  
Anode Material Cu  
K-Alpha1 [Å] 1.54060  
K-Alpha2 [Å] 1.54443  
K-Beta [Å] 1.39225  
K-A2 / K-A1 Ratio 0.50000  
Generator Settings 40 mA, 45 kV  
Diffractometer Type 0000000011166139  
Diffractometer Number 0  
Goniometer Radius [mm] 240.00  
Dist. Focus-Diverg. Slit [mm] 100.00  
Incident Beam Monochromator No  
Spinning No

**Main Graphics, Analyze View:** (Bookmark 2)

---

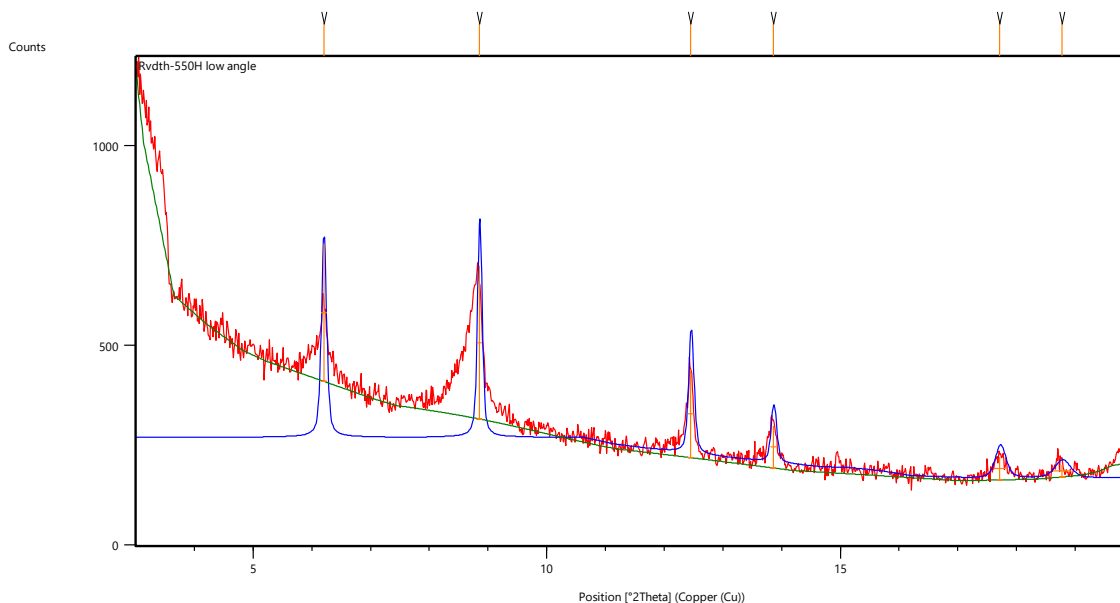

**Peak List:** (Bookmark 3)

| Pos. [°2Th.] | Height [cts] | FWHM Left [°2Th.] | d-spacing [Å] | Rel. Int. [%] |
|--------------|--------------|-------------------|---------------|---------------|
| 6.2033       | 345.49       | 0.1023            | 14.24813      | 90.20         |
| 8.8546       | 383.03       | 0.0895            | 9.98700       | 100.00        |
| 12.4535      | 222.00       | 0.1023            | 7.10779       | 57.96         |
| 13.8593      | 105.00       | 0.1023            | 6.38982       | 27.41         |
| 17.7168      | 57.48        | 0.2047            | 5.00631       | 15.01         |
| 18.7748      | 31.03        | 0.3070            | 4.72651       | 8.10          |

Insert Measurement:

- File name = "Rvdth-550H low angle.xrdml"
- Modification time = "03-06-2021 22:55:26"
- Modification editor = "GM"

Default properties:

- Measurement step axis = "None"
- Internal wavelengths used from anode material: Copper (Cu)
- Original K-Alpha1 wavelength = "1.54060"
- Used K-Alpha1 wavelength = "1.54060"
- Original K-Alpha2 wavelength = "1.54443"
- Used K-Alpha2 wavelength = "1.54443"
- Original K-Beta wavelength = "1.39225"
- Used K-Beta wavelength = "1.39225"
- Irradiated length = "10.00000"
- Spinner used = "No"
- Receiving slit size = "0.10000"
- Step axis value = "0.00000"
- Offset = "0.00000"
