# Supplementary material for: Clay minerals identification in rock varnish by XRD: A one-step reduction approach
Source: PubMed Central journal article supplement — MethodsX. 2021 Sep 6;8:101511. doi: 10.1016/j.mex.2021.101511 (PMC8563653; doi:10.1016/j.mex.2021.101511), 2021-09-06
Supplement: mmc5.pdf [file mmc5.pdf]

**Measurement Conditions:** (Bookmark 1)

Dataset Name Rvdth-gly low angle 1  
File name I:\xrd methodsx slide\Rvdth-gly low angle 1.xrdml  
Comment Configuration=Multi Purpose Sample Stage, Owner=User-1,  
Creation date=3/27/2015 3:44:05 PM  
Goniometer=PW3050/60 (Theta/Theta); Minimum step size  
2Theta:0.001; Minimum step size Omega:0.001  
Sample stage=Multi purpose sample stage; Minimum step size  
Phi:2.5  
Diffractometer system=XPERT-3  
Measurement program=C:\PANalytical\Data  
Collector\Programs\Clay Analysis\_MPSS\_Low Angle scan.xrdmp, Identifier={A7C708CA-  
5A80-4640-A857-D9660517B47F}  
Measurement Date / Time 31-05-2021 18:42:34  
Operator User  
Raw Data Origin XRD measurement (\*.XRDML)  
Scan Axis Gonio  
Start Position [ $^{\circ}$ 2Th.] 3.0066  
End Position [ $^{\circ}$ 2Th.] 19.9846  
Step Size [ $^{\circ}$ 2Th.] 0.0130  
Scan Step Time [s] 48.1950  
Scan Type Continuous  
PSD Mode Scanning  
PSD Length [ $^{\circ}$ 2Th.] 3.35  
Offset [ $^{\circ}$ 2Th.] 0.0000  
Divergence Slit Type Fixed  
Divergence Slit Size [ $^{\circ}$ ] 0.1089  
Specimen Length [mm] 10.00  
Measurement Temperature [ $^{\circ}$ C] 25.00  
Anode Material Cu  
K-Alpha1 [ $\text{\AA}$ ] 1.54060  
K-Alpha2 [ $\text{\AA}$ ] 1.54443  
K-Beta [ $\text{\AA}$ ] 1.39225  
K-A2 / K-A1 Ratio 0.50000  
Generator Settings 40 mA, 45 kV  
Diffractometer Type 0000000011166139  
Diffractometer Number 0  
Goniometer Radius [mm] 240.00  
Dist. Focus-Diverg. Slit [mm] 100.00  
Incident Beam Monochromator No  
Spinning No

**Main Graphics, Analyze View:** (Bookmark 2)

---

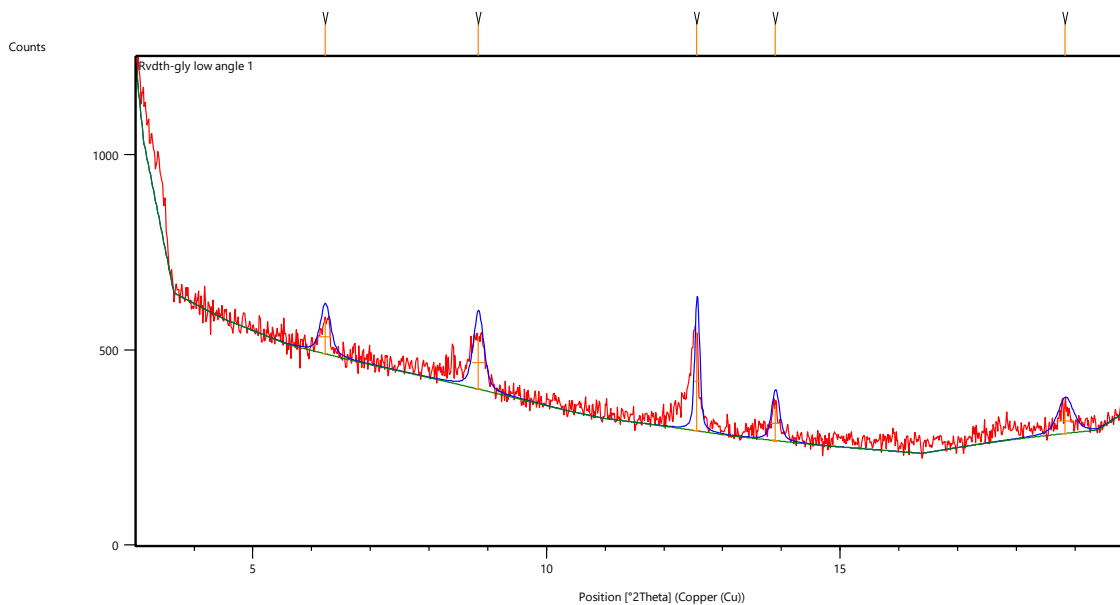

**Peak List:** (Bookmark 3)

| Pos. [°2Th.] | Height [cts] | FWHM Left [°2Th.] | d-spacing [Å] | Rel. Int. [%] |
|--------------|--------------|-------------------|---------------|---------------|
| 6.2326       | 87.34        | 0.2047            | 14.18141      | 34.56         |
| 8.8370       | 136.08       | 0.2047            | 10.00679      | 53.84         |
| 12.5587      | 252.75       | 0.0895            | 7.04853       | 100.00        |
| 13.8923      | 90.94        | 0.1535            | 6.37474       | 35.98         |
| 18.8260      | 63.14        | 0.3070            | 4.71378       | 24.98         |

Insert Measurement:

- File name = "Rvdth-gly low angle 1.xrdml"
- Modification time = "03-06-2021 22:57:44"
- Modification editor = "GM"

Default properties:

- Measurement step axis = "None"
- Internal wavelengths used from anode material: Copper (Cu)
- Original K-Alpha1 wavelength = "1.54060"
- Used K-Alpha1 wavelength = "1.54060"
- Original K-Alpha2 wavelength = "1.54443"
- Used K-Alpha2 wavelength = "1.54443"
- Original K-Beta wavelength = "1.39225"
- Used K-Beta wavelength = "1.39225"
- Irradiated length = "10.00000"
- Spinner used = "No"
- Receiving slit size = "0.10000"
- Step axis value = "0.00000"
- Offset = "0.00000"
