# Supplementary material for: Clay minerals identification in rock varnish by XRD: A one-step reduction approach
Source: PubMed Central journal article supplement — MethodsX. 2021 Sep 6;8:101511. doi: 10.1016/j.mex.2021.101511 (PMC8563653; doi:10.1016/j.mex.2021.101511), 2021-09-06
Supplement: mmc6.pdf [file mmc6.pdf]

**Measurement Conditions:** (Bookmark 1)

Dataset Name 4v  
File name F:\Phd\XRD\varnish\4r.xrdml  
Comment Configuration=Multi Purpose Sample Stage, Owner=User-1,  
Creation date=3/27/2015 3:44:05 PM  
Goniometer=PW3050/60 (Theta/Theta); Minimum step size  
2Theta:0.001; Minimum step size Omega:0.001  
Sample stage=Multi purpose sample stage; Minimum step size  
Phi:2.5  
Diffractometer system=XPERT-3  
Measurement program=C:\PANalytical\Data  
Collector\Programs\Bulk Powder\_BBHD\_MPPS\_1D.xrdmp, Identifier={0DD3DEF2-8437-  
461E-AC19-19C3A3EF6485}  
MPSS stage  
Measurement Date / Time 07-11-2019 14:41:41  
Operator User  
Raw Data Origin XRD measurement (\*.XRDML)  
Scan Axis Gonio  
Start Position [ $^{\circ}2\text{Th.}$ ] 5.0116  
End Position [ $^{\circ}2\text{Th.}$ ] 69.9856  
Step Size [ $^{\circ}2\text{Th.}$ ] 0.0130  
Scan Step Time [s] 32.8950  
Scan Type Continuous  
PSD Mode Scanning  
PSD Length [ $^{\circ}2\text{Th.}$ ] 3.35  
Offset [ $^{\circ}2\text{Th.}$ ] 0.0000  
Divergence Slit Type Fixed  
Divergence Slit Size [ $^{\circ}$ ] 0.2177  
Specimen Length [mm] 10.00  
Measurement Temperature [ $^{\circ}\text{C}$ ] 25.00  
Anode Material Cu  
K-Alpha1 [ $\text{\AA}$ ] 1.54060  
K-Alpha2 [ $\text{\AA}$ ] 1.54443  
K-Beta [ $\text{\AA}$ ] 1.39225  
K-A2 / K-A1 Ratio 0.50000  
Generator Settings 30 mA, 40 kV  
Diffractometer Type 0000000011166139  
Diffractometer Number 0  
Goniometer Radius [mm] 240.00  
Dist. Focus-Diverg. Slit [mm] 100.00  
Incident Beam Monochromator No  
Spinning No

**Main Graphics, Analyze View:** (Bookmark 2)

---

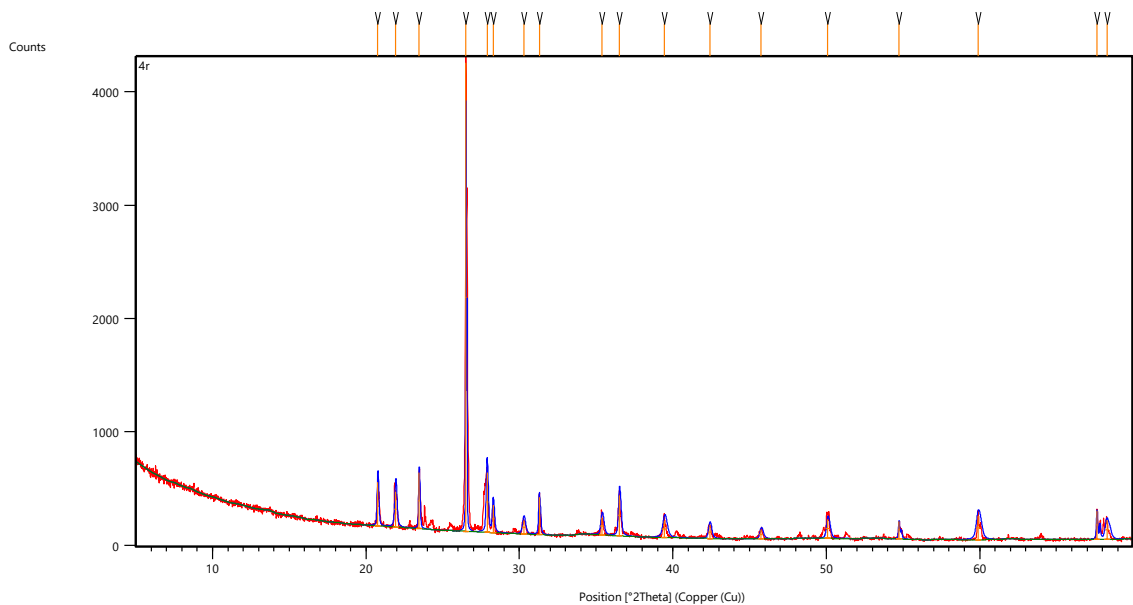

**Peak List:** (Bookmark 3)

| Pos. [°2Th.] | Height [cts] | FWHM Left [°2Th.] | d-spacing [Å] | Rel. Int. [%] |
|--------------|--------------|-------------------|---------------|---------------|
| 20.7696      | 383.01       | 0.1023            | 4.27684       | 9.26          |
| 21.9330      | 311.76       | 0.1535            | 4.05255       | 7.54          |
| 23.4721      | 494.06       | 0.0768            | 3.79019       | 11.95         |
| 26.5096      | 4134.60      | 0.0384            | 3.36240       | 100.00        |
| 27.8921      | 528.70       | 0.1279            | 3.19880       | 12.79         |
| 28.2914      | 244.84       | 0.1279            | 3.15456       | 5.92          |
| 30.2864      | 119.31       | 0.2047            | 2.95116       | 2.89          |
| 31.2943      | 330.99       | 0.1023            | 2.85837       | 8.01          |
| 35.3859      | 150.75       | 0.2047            | 2.53668       | 3.65          |
| 36.5157      | 359.24       | 0.1535            | 2.46075       | 8.69          |
| 39.4637      | 147.16       | 0.3070            | 2.28346       | 3.56          |
| 42.4001      | 117.52       | 0.2047            | 2.13187       | 2.84          |
| 45.7515      | 81.89        | 0.2047            | 1.98320       | 1.98          |
| 50.1018      | 167.03       | 0.2047            | 1.82072       | 4.04          |
| 54.7500      | 157.10       | 0.1023            | 1.67664       | 3.80          |
| 59.8994      | 211.69       | 0.3070            | 1.54422       | 5.12          |
| 67.6538      | 258.49       | 0.0936            | 1.38372       | 6.25          |
| 68.2875      | 169.33       | 0.2558            | 1.37356       | 4.10          |
