# Supplementary material for: Clay minerals identification in rock varnish by XRD: A one-step reduction approach
Source: PubMed Central journal article supplement — MethodsX. 2021 Sep 6;8:101511. doi: 10.1016/j.mex.2021.101511 (PMC8563653; doi:10.1016/j.mex.2021.101511), 2021-09-06
Supplement: mmc7.pdf [file mmc7.pdf]

**Measurement Conditions:** (Bookmark 1)

|                                                                                                      |                                                            |
|------------------------------------------------------------------------------------------------------|------------------------------------------------------------|
| Dataset Name                                                                                         | RVlayer reduced                                            |
| File name                                                                                            | F:\Phd\method\rv-dthR.xrdml                                |
| Comment                                                                                              | Configuration=Multi Purpose Sample Stage, Owner=User-1,    |
| Creation date=3/27/2015 3:44:05 PM                                                                   | Goniometer=PW3050/60 (Theta/Theta); Minimum step size      |
| 2Theta:0.001; Minimum step size                                                                      | Omega:0.001                                                |
| Phi:2.5                                                                                              | Sample stage=Multi purpose sample stage; Minimum step size |
|                                                                                                      | Diffractometer system=XPERT-3                              |
|                                                                                                      | Measurement program=C:\PANalytical\Data                    |
| Collector\Programs\Bulk Powder_BBHD_MPPS_1D.xrdmp, Identifier={FA755B84-DF04-41AA-8AD7-C4E850FAC733} | MPSS stage                                                 |
| Measurement Date / Time                                                                              | 12-03-2021 13:21:15                                        |
| Operator                                                                                             | User                                                       |
| Raw Data Origin                                                                                      | XRD measurement (*.XRDML)                                  |
| Scan Axis                                                                                            | Gonio                                                      |
| Start Position [°2Th.]                                                                               | 3.0066                                                     |
| End Position [°2Th.]                                                                                 | 69.9956                                                    |
| Step Size [°2Th.]                                                                                    | 0.0130                                                     |
| Scan Step Time [s]                                                                                   | 29.0700                                                    |
| Scan Type                                                                                            | Continuous                                                 |
| PSD Mode                                                                                             | Scanning                                                   |
| PSD Length [°2Th.]                                                                                   | 3.35                                                       |
| Offset [°2Th.]                                                                                       | 0.0000                                                     |
| Divergence Slit Type                                                                                 | Fixed                                                      |
| Divergence Slit Size [°]                                                                             | 0.2177                                                     |
| Specimen Length [mm]                                                                                 | 10.00                                                      |
| Measurement Temperature [°C]                                                                         | 25.00                                                      |
| Anode Material                                                                                       | Cu                                                         |
| K-Alpha1 [Å]                                                                                         | 1.54060                                                    |
| K-Alpha2 [Å]                                                                                         | 1.54443                                                    |
| K-Beta [Å]                                                                                           | 1.39225                                                    |
| K-A2 / K-A1 Ratio                                                                                    | 0.50000                                                    |
| Generator Settings                                                                                   | 30 mA, 40 kV                                               |
| Diffraction Type                                                                                     | 0000000011166139                                           |
| Diffraction Number                                                                                   | 0                                                          |
| Goniometer Radius [mm]                                                                               | 240.00                                                     |
| Dist. Focus-Diverg. Slit [mm]                                                                        | 100.00                                                     |
| Incident Beam Monochromator                                                                          | No                                                         |
| Spinning                                                                                             | No                                                         |

**Main Graphics, Analyze View:** (Bookmark 2)

---

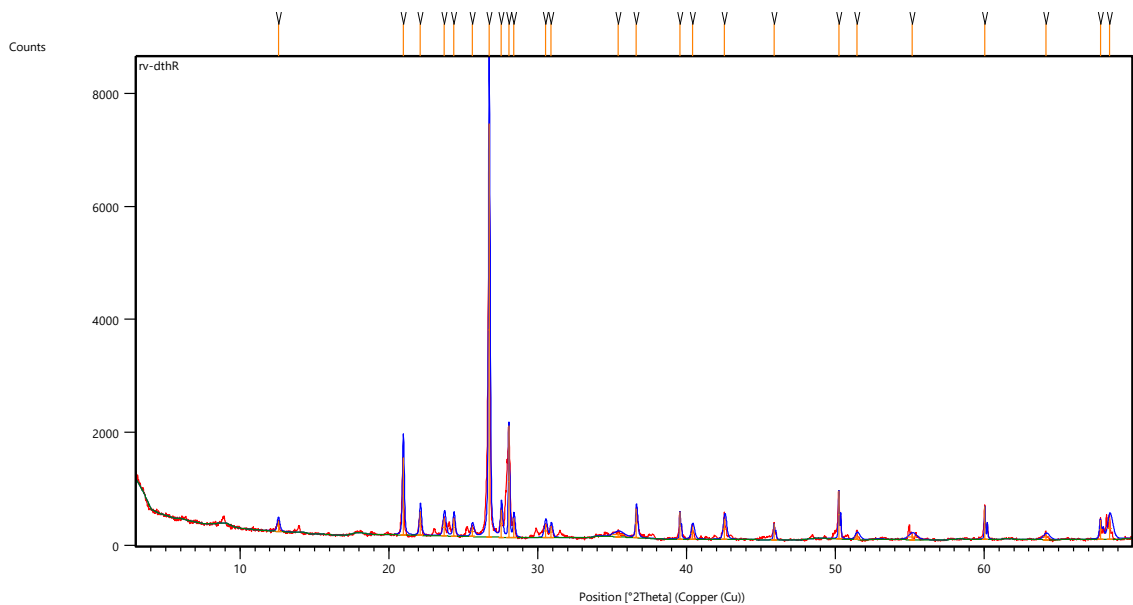

**Peak List:** (Bookmark 3)

| Pos. [°2Th.] | Height [cts] | FWHM Left [°2Th.] | d-spacing [Å] | Rel. Int. [%] |
|--------------|--------------|-------------------|---------------|---------------|
| 12.5722      | 177.00       | 0.2047            | 7.04098       | 2.42          |
| 20.9613      | 1374.31      | 0.1151            | 4.23816       | 18.76         |
| 22.1107      | 422.94       | 0.1407            | 4.02038       | 5.77          |
| 23.7258      | 317.68       | 0.2047            | 3.75022       | 4.34          |
| 24.3652      | 320.67       | 0.1535            | 3.65325       | 4.38          |
| 25.6107      | 180.09       | 0.2047            | 3.47834       | 2.46          |
| 26.7288      | 7325.29      | 0.1023            | 3.33532       | 100.00        |
| 27.5575      | 484.74       | 0.1535            | 3.23687       | 6.62          |
| 28.0552      | 1984.30      | 0.0640            | 3.18057       | 27.09         |
| 28.4008      | 346.44       | 0.1279            | 3.14265       | 4.73          |
| 30.5263      | 239.47       | 0.2047            | 2.92850       | 3.27          |
| 30.9083      | 204.59       | 0.1535            | 2.89318       | 2.79          |
| 35.4047      | 71.06        | 0.8187            | 2.53538       | 0.97          |
| 36.6294      | 519.06       | 0.1279            | 2.45337       | 7.09          |
| 39.5600      | 482.87       | 0.0768            | 2.27812       | 6.59          |
| 40.3982      | 225.65       | 0.2047            | 2.23276       | 3.08          |
| 42.5576      | 367.05       | 0.2047            | 2.12434       | 5.01          |
| 45.8771      | 292.47       | 0.1023            | 1.97806       | 3.99          |
| 50.2317      | 857.91       | 0.0768            | 1.81632       | 11.71         |
| 51.4406      | 102.62       | 0.3070            | 1.77644       | 1.40          |
| 55.1443      | 87.29        | 0.6140            | 1.66558       | 1.19          |
| 60.0496      | 591.08       | 0.0768            | 1.54072       | 8.07          |
| 64.1316      | 90.26        | 0.4093            | 1.45215       | 1.23          |
| 67.8101      | 340.19       | 0.1535            | 1.38206       | 4.64          |
| 68.4210      | 387.45       | 0.3070            | 1.37120       | 5.29          |
