# Supplementary material for: Clay minerals identification in rock varnish by XRD: A one-step reduction approach
Source: PubMed Central journal article supplement — MethodsX. 2021 Sep 6;8:101511. doi: 10.1016/j.mex.2021.101511 (PMC8563653; doi:10.1016/j.mex.2021.101511), 2021-09-06
Supplement: mmc8.pdf [file mmc8.pdf]

**Measurement Conditions:** (Bookmark 1)

Dataset Name rv-dthRsmall  
File name F:\Phd\method\rv-dthRsmall.xrdml  
Comment Configuration=Multi Purpose Sample Stage, Owner=User-1,  
Creation date=3/27/2015 3:44:05 PM  
Goniometer=PW3050/60 (Theta/Theta); Minimum step size  
2Theta:0.001; Minimum step size Omega:0.001  
Sample stage=Multi purpose sample stage; Minimum step size  
Phi:2.5  
Diffractometer system=XPERT-3  
Measurement program=C:\PANalytical\Data  
Collector\Programs\Bulk Powder\_BBHD\_MPPS\_1D.xrdmp, Identifier={ A8BC1A35-464D-  
4927-871A-2D4EF80A9C91 }  
MPSS stage  
Measurement Date / Time 12-03-2021 13:43:53  
Operator User  
Raw Data Origin XRD measurement (\*.XRDML)  
Scan Axis Gonio  
Start Position [ $^{\circ}$ 2Th.] 3.0026  
End Position [ $^{\circ}$ 2Th.] 19.9806  
Step Size [ $^{\circ}$ 2Th.] 0.0130  
Scan Step Time [s] 29.0700  
Scan Type Continuous  
PSD Mode Scanning  
PSD Length [ $^{\circ}$ 2Th.] 3.35  
Offset [ $^{\circ}$ 2Th.] 0.0000  
Divergence Slit Type Fixed  
Divergence Slit Size [ $^{\circ}$ ] 0.2177  
Specimen Length [mm] 10.00  
Measurement Temperature [ $^{\circ}$ C] 25.00  
Anode Material Cu  
K-Alpha1 [ $\text{\AA}$ ] 1.54060  
K-Alpha2 [ $\text{\AA}$ ] 1.54443  
K-Beta [ $\text{\AA}$ ] 1.39225  
K-A2 / K-A1 Ratio 0.50000  
Generator Settings 30 mA, 40 kV  
Diffractometer Type 0000000011166139  
Diffractometer Number 0  
Goniometer Radius [mm] 240.00  
Dist. Focus-Diverg. Slit [mm] 100.00  
Incident Beam Monochromator No  
Spinning No

**Main Graphics, Analyze View:** (Bookmark 2)

---

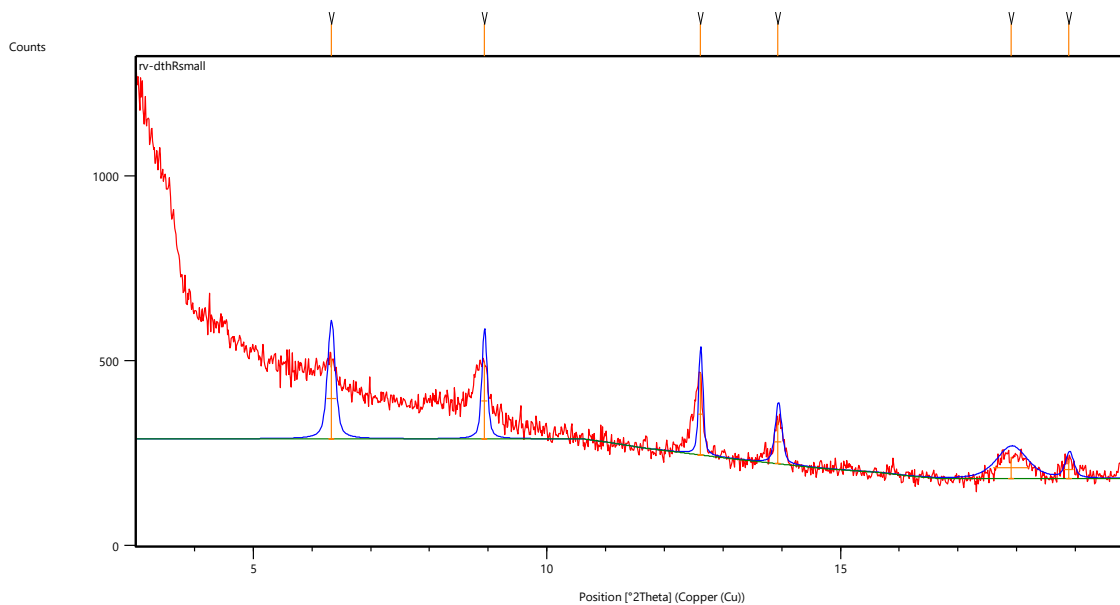

**Peak List:** (Bookmark 3)

| Pos. [°2Th.] | Height [cts] | FWHM Left [°2Th.] | d-spacing [Å] | Rel. Int. [%] |
|--------------|--------------|-------------------|---------------|---------------|
| 6.3264       | 216.29       | 0.1535            | 13.97119      | 97.15         |
| 8.9325       | 207.03       | 0.1023            | 9.90007       | 93.00         |
| 12.6122      | 222.63       | 0.0768            | 7.01875       | 100.00        |
| 13.9350      | 117.20       | 0.1279            | 6.35529       | 52.64         |
| 17.9074      | 59.64        | 0.6140            | 4.95346       | 26.79         |
| 18.8885      | 50.16        | 0.1535            | 4.69832       | 22.53         |

**Pattern List:** (Bookmark 4)

**Document History:** (Bookmark 5)

Insert Measurement:

- File name = "rv-dthRsmall.xrdbl"
- Modification time = "09-04-2021 15:51:57"
- Modification editor = "GM"

Default properties:

- Measurement step axis = "None"
- Internal wavelengths used from anode material: Copper (Cu)
- Original K-Alpha1 wavelength = "1.54060"
- Used K-Alpha1 wavelength = "1.54060"
- Original K-Alpha2 wavelength = "1.54443"
