# Supplementary material for: Clay minerals identification in rock varnish by XRD: A one-step reduction approach
Source: PubMed Central journal article supplement — MethodsX. 2021 Sep 6;8:101511. doi: 10.1016/j.mex.2021.101511 (PMC8563653; doi:10.1016/j.mex.2021.101511), 2021-09-06

## Clay slide process information

(a) With solids dispersed only in water, centrifugation with conditions based on Stokes' law was applied to yield  $<2\mu\text{m}$  clay suspensions.

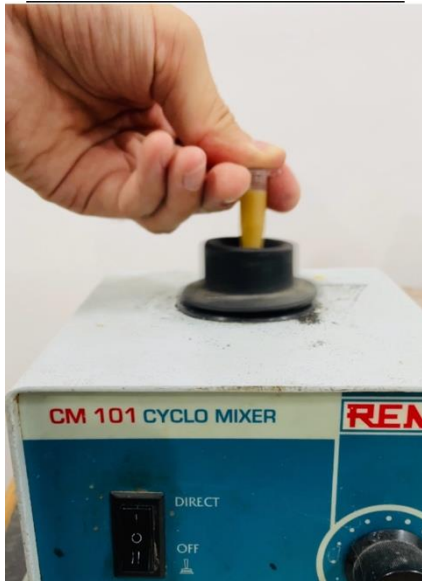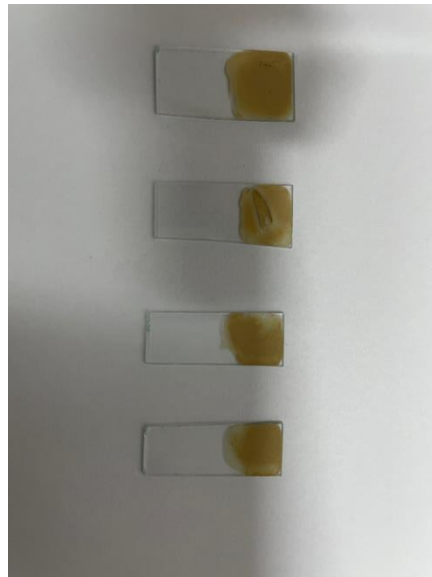

(b) Heat treatment at  $550^{\circ}\text{C}$  for 1hr – oriented clay slides were placed in a muffle furnace and undergone heat treatment at  $550^{\circ}\text{C}$ .

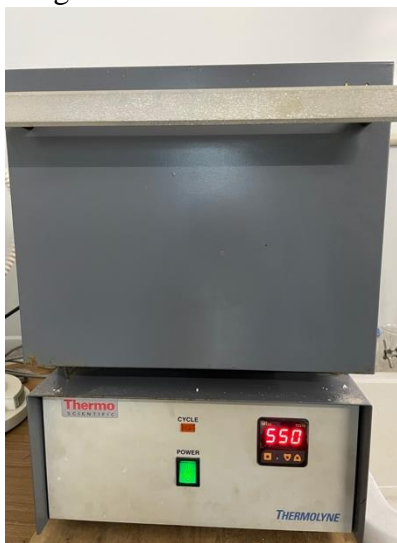

(c) Ethylene glycol solvation (EG) - oriented clay slides were placed in a small desiccator containing a Petri dish full of ethylene glycol, and the desiccator was placed in an oven at  $65^{\circ}\text{C}$  for 24 hours.

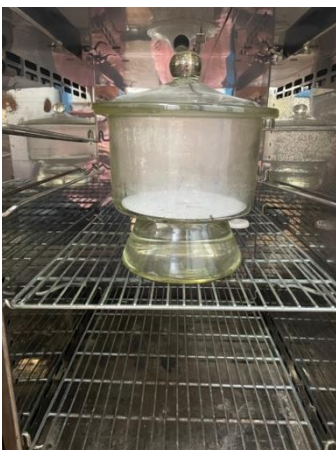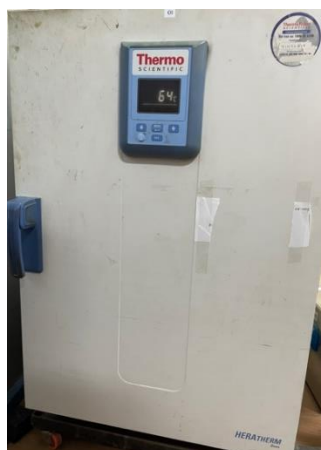

Supplement: mmc9.pdf [file mmc9.pdf]
