# Supplementary material for: Clay minerals identification in rock varnish by XRD: A one-step reduction approach
Source: PubMed Central journal article supplement — MethodsX. 2021 Sep 6;8:101511. doi: 10.1016/j.mex.2021.101511 (PMC8563653; doi:10.1016/j.mex.2021.101511), 2021-09-06
Supplement: mmc10.pdf [file mmc10.pdf]

---

## Name and formula

|                         |                                            |
|-------------------------|--------------------------------------------|
| Reference code:         | 00-022-0675                                |
| Mineral name:           | Microcline, intermediate                   |
| Compound name:          | Potassium Aluminum Silicate                |
| PDF index name:         | Potassium Aluminum Silicate                |
| Empirical formula:      | $\text{AlK}_8\text{Si}_3$                  |
| Chemical formula:       | $\text{KAlSi}_3\text{O}_8$                 |
| Mineral classification: | Feldspar (Family), orthoclase (Supergroup) |

## Crystallographic parameters

|                     |          |
|---------------------|----------|
| Crystal system:     | Anorthic |
| Space group:        | C-1      |
| Space group number: | 2        |

|            |          |
|------------|----------|
| a (Å):     | 8.5784   |
| b (Å):     | 12.9600  |
| c (Å):     | 7.2112   |
| Alpha (°): | 89.7000  |
| Beta (°):  | 115.9700 |
| Gamma (°): | 90.8700  |

|                                                    |        |
|----------------------------------------------------|--------|
| Calculated density (g/cm <sup>3</sup> ):           | 2.56   |
| Volume of cell (10 <sup>6</sup> pm <sup>3</sup> ): | 360.34 |
| Z:                                                 | 4.00   |

RIR:: -

## Status, subfiles and quality

|           |                                                                                     |
|-----------|-------------------------------------------------------------------------------------|
| Status:   | Marked as deleted by ICDD                                                           |
| Subfiles: | Common Phase, Forensic, Inorganic, Mineral, Mineral - Mineral, Mineral<br>- Natural |
| Quality:  | Indexed (I)                                                                         |

## Comments

---

ANX: ABC3X8  
Creation Date: 9/1/1972  
Cross-References: ICDD:04-007-8600  
ANX: ABC3X8  
Deleted Or Rejected By: Deleted by 00-019-0932, calculated confirms experimental, MTG 1992  
Additional Diffraction Lines: Plus 37 additional reflections to 1.271  
Warning: Not enough reflections above the intensity cut off to meet higher  
quality mark criteria  
Unit Cell Data Source: Powder Diffraction.

## References

Primary reference: Borg, Smith., *Am. Mineral.*, **54**, 163, (1969)  
Unit cell: Bailey, Taylor., *Acta Crystallogr.*, **8**, 621, (1955)

---

**Peak list**

| No. | h  | k  | l | d [Å]   | 2 $\theta$ [°] | I [%] |
|-----|----|----|---|---------|----------------|-------|
| 1   | 1  | -1 | 0 | 6.66900 | 13.265         | 4.0   |
| 2   | 1  | 1  | 0 | 6.58500 | 13.435         | 2.0   |
| 3   | 0  | 2  | 0 | 6.48100 | 13.652         | 6.0   |
| 4   | -1 | 1  | 1 | 5.89300 | 15.022         | 5.0   |
| 5   | -1 | -1 | 1 | 5.84200 | 15.154         | 5.0   |
| 6   | 0  | -2 | 1 | 4.58700 | 19.335         | 3.0   |
| 7   | -2 | 0  | 1 | 4.22500 | 21.010         | 58.0  |
| 8   | 1  | 1  | 1 | 3.94900 | 22.497         | 11.0  |
| 9   | 2  | 0  | 0 | 3.85600 | 23.047         | 7.0   |
| 10  | 1  | -3 | 0 | 3.79200 | 23.441         | 36.0  |
| 11  | 1  | 3  | 0 | 3.74600 | 23.733         | 37.0  |
| 12  | -1 | 3  | 1 | 3.62900 | 24.510         | 12.0  |
| 13  | -1 | -3 | 1 | 3.59300 | 24.759         | 8.0   |
| 14  | -2 | 2  | 1 | 3.56300 | 24.971         | 9.0   |
| 15  | -2 | -2 | 1 | 3.51500 | 25.318         | 7.0   |
| 16  | -1 | 1  | 2 | 3.47400 | 25.622         | 47.0  |
| 17  | 2  | -2 | 0 | 3.33500 | 26.709         | 53.0  |
| 18  | 2  | 2  | 0 | 3.29200 | 27.064         | 100.0 |
| 19  | 0  | 0  | 2 | 3.24100 | 27.499         | 96.0  |
| 20  | 1  | -3 | 1 | 3.00500 | 29.706         | 26.0  |
| 21  | 1  | 3  | 1 | 2.97900 | 29.971         | 29.0  |
| 22  | -2 | 2  | 2 | 2.94600 | 30.315         | 5.0   |
| 23  | 0  | 2  | 2 | 2.89800 | 30.829         | 27.0  |
| 24  | -1 | 3  | 2 | 2.77400 | 32.244         | 11.0  |
| 25  | -1 | -3 | 2 | 2.76100 | 32.400         | 12.0  |
| 26  | -3 | 1  | 2 | 2.61200 | 34.304         | 9.0   |
| 27  | 2  | -2 | 1 | 2.59300 | 34.563         | 19.0  |
| 28  | 1  | 1  | 2 | 2.55600 | 35.080         | 21.0  |
| 29  | 3  | -1 | 0 | 2.52800 | 35.481         | 5.0   |
| 30  | 3  | 1  | 0 | 2.51400 | 35.685         | 5.0   |
| 31  | 2  | 4  | 0 | 2.46300 | 36.450         | 1.0   |
| 32  | -1 | 5  | 1 | 2.42000 | 37.121         | 5.0   |
| 33  | -3 | 3  | 1 | 2.40100 | 37.426         | 7.0   |
| 34  | -3 | -3 | 1 | 2.36600 | 38.000         | 4.0   |
| 35  | -1 | -1 | 3 | 2.32900 | 38.628         | 6.0   |
| 36  | -3 | 3  | 2 | 2.27800 | 39.528         | 2.0   |
| 37  | -3 | -3 | 2 | 2.25100 | 40.022         | 2.0   |
| 38  | 1  | 3  | 2 | 2.22500 | 40.510         | 2.0   |

---

|    |    |    |   |         |        |      |
|----|----|----|---|---------|--------|------|
| 39 | 1  | -5 | 1 | 2.20700 | 40.855 | 2.0  |
| 40 | 1  | 5  | 1 | 2.19200 | 41.148 | 3.0  |
| 41 | 0  | 6  | 0 | 2.16000 | 41.786 | 16.0 |
| 42 | 2  | -4 | 1 | 2.13700 | 42.257 | 5.0  |
| 43 | 2  | 4  | 1 | 2.11500 | 42.718 | 9.0  |
| 44 | 3  | 1  | 1 | 2.06500 | 43.805 | 3.0  |
| 45 | 0  | 2  | 3 | 2.04900 | 44.165 | 4.0  |
| 46 | -4 | 2  | 2 | 2.01700 | 44.903 | 4.0  |
| 47 | -4 | -2 | 2 | 2.00000 | 45.306 | 5.0  |
| 48 | 2  | -2 | 2 | 1.98000 | 45.790 | 5.0  |
| 49 | 2  | 2  | 2 | 1.97000 | 46.035 | 5.0  |
| 50 | -3 | 3  | 3 | 1.96400 | 46.184 | 4.0  |
| 51 | -3 | -3 | 3 | 1.94700 | 46.611 | 2.0  |
| 52 | 4  | 0  | 0 | 1.92800 | 47.098 | 7.0  |
| 53 | -4 | 0  | 3 | 1.91400 | 47.463 | 5.0  |
| 54 | 1  | -1 | 3 | 1.85900 | 48.958 | 4.0  |

---

## Structure

| No. | Name | Element | X       | Y       | Z       | Biso   | sof    | Wyck. |
|-----|------|---------|---------|---------|---------|--------|--------|-------|
| 1   | AL1  | Al      | 0.00920 | 0.18360 | 0.22790 | 0.5000 | 0.2500 | 4*    |
| 2   | SI1  | Si      | 0.00950 | 0.81360 | 0.22210 | 0.5000 | 0.4400 | 4*    |
| 3   | AL2  | Al      | 0.70680 | 0.11590 | 0.34610 | 0.5000 | 0.0700 | 4*    |
| 4   | AL3  | Al      | 0.70890 | 0.88200 | 0.34270 | 0.5000 | 0.0800 | 4*    |
| 5   | K1   | K       | 0.28420 | 0.00330 | 0.13860 | 0.5000 | 1.0000 | 4*    |
| 6   | SI2  | Si      | 0.00920 | 0.18360 | 0.22790 | 0.5000 | 0.7500 | 4*    |
| 7   | AL4  | Al      | 0.00950 | 0.81360 | 0.22210 | 0.5000 | 0.5600 | 4*    |
| 8   | SI3  | Si      | 0.70680 | 0.11590 | 0.34610 | 0.5000 | 0.9300 | 4*    |
| 9   | SI4  | Si      | 0.70890 | 0.88200 | 0.34270 | 0.5000 | 0.9200 | 4*    |
| 10  | O1   | O       | 0.00030 | 0.14520 | 0.00660 | 0.5000 | 1.0000 | 4*    |
| 11  | O2   | O       | 0.63890 | 0.99860 | 0.28610 | 0.5000 | 1.0000 | 4*    |
| 12  | O3   | O       | 0.82850 | 0.14460 | 0.23520 | 0.5000 | 1.0000 | 4*    |
| 13  | O4   | O       | 0.82280 | 0.85520 | 0.22260 | 0.5000 | 1.0000 | 4*    |
| 14  | O5   | O       | 0.03740 | 0.30900 | 0.26300 | 0.5000 | 1.0000 | 4*    |
| 15  | O6   | O       | 0.03390 | 0.68390 | 0.25480 | 0.5000 | 1.0000 | 4*    |
| 16  | O7   | O       | 0.17670 | 0.12640 | 0.41060 | 0.5000 | 1.0000 | 4*    |
| 17  | O8   | O       | 0.18390 | 0.87710 | 0.40630 | 0.5000 | 1.0000 | 4*    |

---

**Stick Pattern**

Intensity [%]

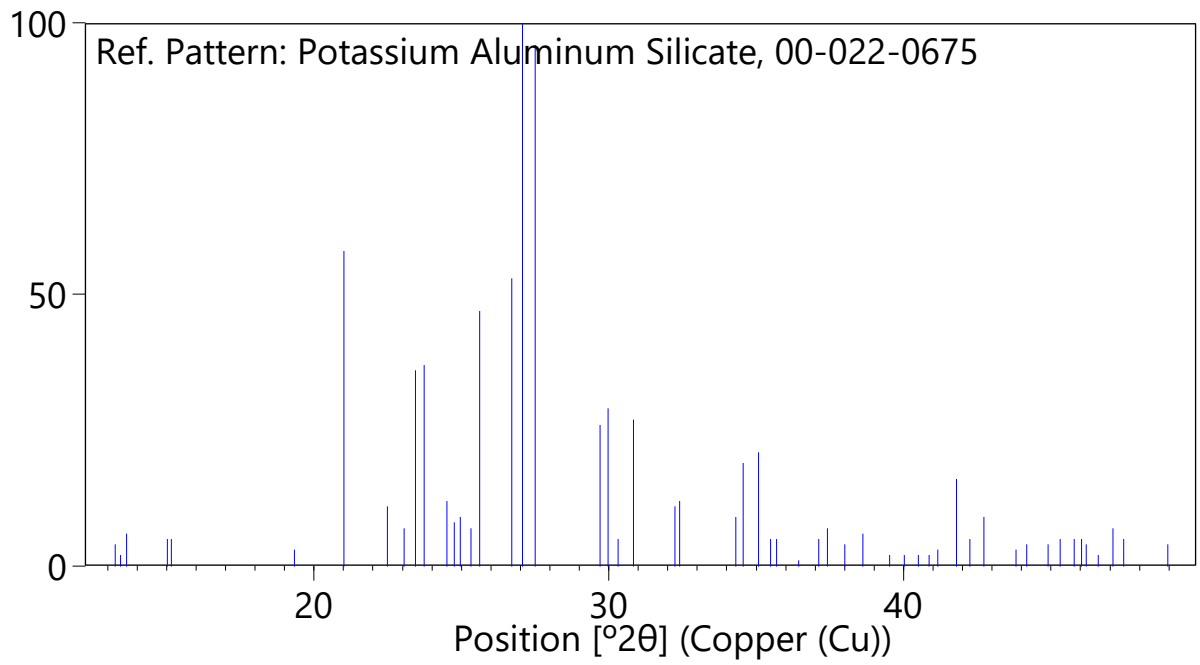

---

## Name and formula

|                         |                                    |
|-------------------------|------------------------------------|
| Reference code:         | 01-087-2096                        |
| Mineral name:           | Quartz, syn                        |
| Compound name:          | Silicon Oxide                      |
| Common name:            | $\alpha$ -Si O <sub>2</sub>        |
| PDF index name:         | Silicon Oxide                      |
| Empirical formula:      | O <sub>2</sub> Si                  |
| Chemical formula:       | SiO <sub>2</sub>                   |
| Mineral classification: | Quartz (Supergroup), Other members |

## Crystallographic parameters

|                                                    |           |
|----------------------------------------------------|-----------|
| Crystal system:                                    | Hexagonal |
| Space group:                                       | P3221     |
| Space group number:                                | 154       |
| a (Å):                                             | 4.9127    |
| b (Å):                                             | 4.9127    |
| c (Å):                                             | 5.4045    |
| Alpha (°):                                         | 90.0000   |
| Beta (°):                                          | 90.0000   |
| Gamma (°):                                         | 120.0000  |
| Volume of cell (10 <sup>6</sup> pm <sup>3</sup> ): | 112.96    |
| Z:                                                 | 3.00      |
| RIR:                                               | 2.88      |

## Status, subfiles and quality

|           |                                                                                                                                                                                          |
|-----------|------------------------------------------------------------------------------------------------------------------------------------------------------------------------------------------|
| Status:   | Alternate Pattern                                                                                                                                                                        |
| Subfiles: | Alloy, metal or intermetallic, Cement and Hydration Product, Common Phase, Excipient, Forensic, ICSD Pattern, Inorganic, Mineral, Mineral - Mineral, Mineral - Synthetic, Pharmaceutical |
| Quality:  | Star (S)                                                                                                                                                                                 |

---

## Comments

ANX: AX2  
ICSD collection code: 83849  
Creation Date: 9/1/2000  
Modification Date: 9/1/2020  
Cross-References: ICDD:04-008-7651, ICSD:83849  
ANX: AX2  
Analysis: O2 Si1  
Formula from original source: Si O2  
ICSD Collection Code: 83849  
Calculated Pattern Original Remarks: Structure determination using synchrotron radiation (powder).  
Structure refinement by Rietveld method. Stable up to 846 K, above P6222, above 1143 K tridymite is stable  
Wyckoff Sequence: c b (P3221)  
Unit Cell Data Source: Powder Diffraction.

## References

Primary reference: Norby, P., *J. Appl. Crystallogr.*, **30**, 21, (1997)  
Structure: Norby, P., *J. Appl. Crystallogr.*, **30**, 21, (1997)



---

**Peak list**

| No. | h | k | l | d [Å]   | 2 $\theta$ [°] | I [%] |
|-----|---|---|---|---------|----------------|-------|
| 1   | 1 | 0 | 0 | 4.25452 | 20.862         | 20.6  |
| 2   | 0 | 1 | 1 | 3.34296 | 26.644         | 100.0 |
| 3   | 1 | 1 | 0 | 2.45635 | 36.552         | 6.3   |
| 4   | 1 | 0 | 2 | 2.28104 | 39.473         | 6.3   |
| 5   | 1 | 1 | 1 | 2.23622 | 40.298         | 2.8   |
| 6   | 2 | 0 | 0 | 2.12726 | 42.459         | 4.5   |
| 7   | 2 | 0 | 1 | 1.97944 | 45.803         | 2.6   |
| 8   | 1 | 1 | 2 | 1.81763 | 50.149         | 10.3  |
| 9   | 0 | 0 | 3 | 1.80150 | 50.629         | 0.3   |
| 10  | 0 | 2 | 2 | 1.67148 | 54.884         | 2.8   |
| 11  | 0 | 1 | 3 | 1.65891 | 55.335         | 1.2   |
| 12  | 2 | 1 | 0 | 1.60806 | 57.243         | 0.2   |
| 13  | 1 | 2 | 1 | 1.54128 | 59.971         | 6.3   |
| 14  | 1 | 1 | 3 | 1.45269 | 64.046         | 1.1   |
| 15  | 3 | 0 | 0 | 1.41817 | 65.799         | 0.3   |
| 16  | 1 | 2 | 2 | 1.38189 | 67.756         | 3.5   |
| 17  | 2 | 0 | 3 | 1.37476 | 68.155         | 4.4   |
| 18  | 0 | 3 | 1 | 1.37173 | 68.327         | 2.7   |
| 19  | 1 | 0 | 4 | 1.28775 | 73.479         | 1.2   |
| 20  | 3 | 0 | 2 | 1.25575 | 75.674         | 1.5   |
| 21  | 2 | 2 | 0 | 1.22818 | 77.686         | 0.8   |
| 22  | 2 | 1 | 3 | 1.19965 | 79.898         | 1.5   |
| 23  | 2 | 2 | 1 | 1.19764 | 80.059         | 0.5   |
| 24  | 1 | 1 | 4 | 1.18385 | 81.185         | 1.3   |
| 25  | 3 | 1 | 0 | 1.17999 | 81.506         | 1.4   |
| 26  | 1 | 3 | 1 | 1.15283 | 83.854         | 0.9   |
| 27  | 2 | 0 | 4 | 1.14052 | 84.969         | 0.1   |
| 28  | 3 | 0 | 3 | 1.11432 | 87.462         | 0.1   |
| 29  | 1 | 3 | 2 | 1.08139 | 90.848         | 1.2   |
| 30  | 4 | 0 | 0 | 1.06363 | 92.808         | 0.2   |
| 31  | 0 | 1 | 5 | 1.04762 | 94.663         | 0.6   |
| 32  | 4 | 0 | 1 | 1.04361 | 95.141         | 0.4   |
| 33  | 2 | 1 | 4 | 1.03445 | 96.257         | 0.6   |
| 34  | 2 | 2 | 3 | 1.01478 | 98.766         | 0.5   |
| 35  | 0 | 4 | 2 | 0.98935 | 102.264        | 0.4   |
| 36  | 1 | 1 | 5 | 0.98935 | 102.264        | 0.4   |
| 37  | 1 | 3 | 3 | 0.98709 | 102.589        | 0.2   |
| 38  | 0 | 3 | 4 | 0.97824 | 103.893        | 0.1   |

---

|    |   |   |   |         |         |     |
|----|---|---|---|---------|---------|-----|
| 39 | 3 | 2 | 0 | 0.97606 | 104.221 | 0.3 |
| 40 | 2 | 3 | 1 | 0.96052 | 106.636 | 0.5 |
| 41 | 3 | 2 | 2 | 0.91801 | 114.090 | 0.2 |
| 42 | 4 | 0 | 3 | 0.91591 | 114.497 | 0.4 |
| 43 | 4 | 1 | 1 | 0.91501 | 114.671 | 0.5 |
| 44 | 2 | 2 | 4 | 0.90882 | 115.900 | 0.2 |
| 45 | 0 | 0 | 6 | 0.90075 | 117.558 | 0.1 |
| 46 | 1 | 2 | 5 | 0.89707 | 118.337 | 0.3 |
| 47 | 3 | 1 | 4 | 0.88876 | 120.156 | 0.3 |
| 48 | 1 | 0 | 6 | 0.88122 | 121.885 | 0.1 |
| 49 | 1 | 4 | 2 | 0.87804 | 122.636 | 0.2 |
| 50 | 3 | 0 | 5 | 0.85967 | 127.285 | 0.1 |
| 51 | 1 | 1 | 6 | 0.84568 | 131.249 | 0.1 |
| 52 | 0 | 2 | 6 | 0.82946 | 136.460 | 0.3 |
| 53 | 1 | 4 | 3 | 0.82527 | 137.940 | 0.4 |
| 54 | 3 | 3 | 0 | 0.81878 | 140.368 | 0.1 |
| 55 | 5 | 0 | 2 | 0.81162 | 143.278 | 0.4 |
| 56 | 2 | 2 | 5 | 0.81162 | 143.278 | 0.4 |
| 57 | 3 | 3 | 1 | 0.80955 | 144.172 | 0.1 |
| 58 | 4 | 2 | 0 | 0.80403 | 146.690 | 0.2 |

---

## Structure

| No. | Name | Element | X       | Y       | Z       | Biso   | sof    | Wyck. |
|-----|------|---------|---------|---------|---------|--------|--------|-------|
| 1   | SI1  | Si      | 0.46800 | 0.00000 | 0.33333 | 0.5000 | 1.0000 | 3a    |
| 2   | O1   | O       | 0.41300 | 0.26600 | 0.21300 | 0.5000 | 1.0000 | 6c    |

---

**Stick Pattern**

Intensity [%]

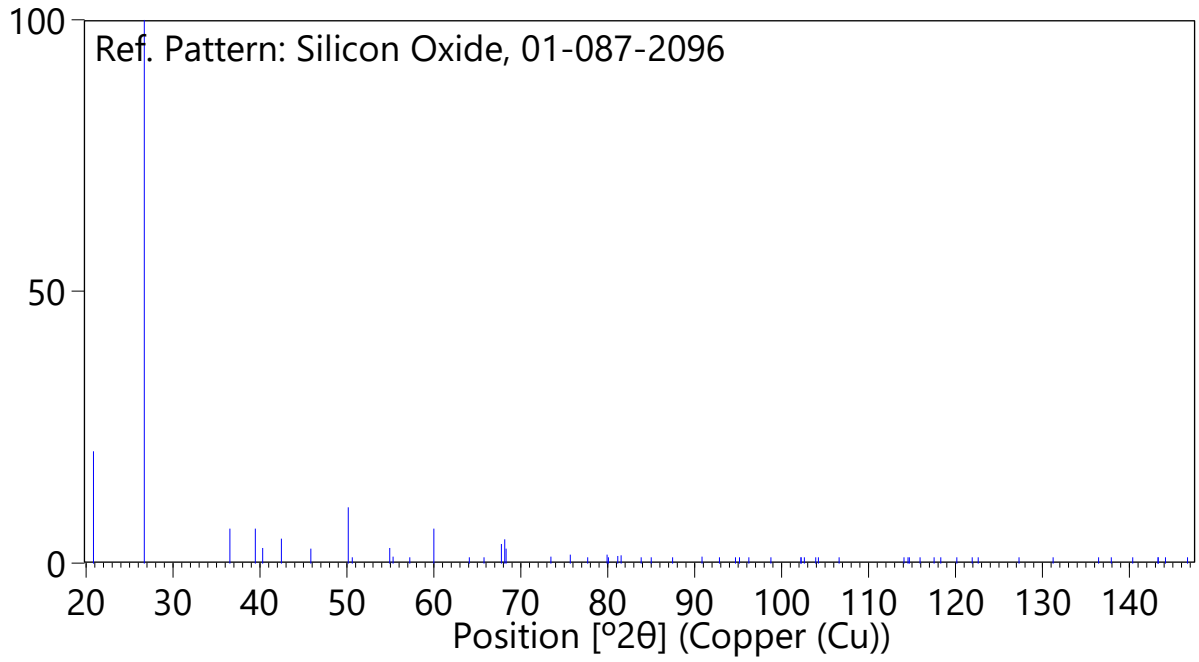

---

## Name and formula

|                   |                                               |
|-------------------|-----------------------------------------------|
| Reference code:   | 98-008-7657                                   |
| Mineral name:     | Albite (heat-treated)                         |
| Compound name:    | Albite (heat-treated)                         |
| Common name:      | Albite (heat-treated)                         |
| Chemical formula: | $\text{Al}_1\text{Na}_1\text{O}_8\text{Si}_3$ |

## Crystallographic parameters

|                                                    |          |
|----------------------------------------------------|----------|
| Crystal system:                                    | Anorthic |
| Space group:                                       | P -1     |
| Space group number:                                | 2        |
| a (Å):                                             | 7.1320   |
| b (Å):                                             | 7.4880   |
| c (Å):                                             | 7.6720   |
| Alpha (°):                                         | 115.0640 |
| Beta (°):                                          | 107.1160 |
| Gamma (°):                                         | 100.6130 |
| Calculated density (g/cm <sup>3</sup> ):           | 2.63     |
| Volume of cell (10 <sup>6</sup> pm <sup>3</sup> ): | 331.36   |
| Z:                                                 | 4.00     |
| RIR:                                               | 0.65     |

## Subfiles and quality

|           |                              |
|-----------|------------------------------|
| Subfiles: | User Inorganic, User Mineral |
| Quality:  | User From Structure (=)      |

## Comments

|                            |                                            |
|----------------------------|--------------------------------------------|
| Creation Date:             | 12/16/2000                                 |
| Cross-References:          | ICSD:87657, PANICSD:98-008-7657            |
| Original ICSD space group: | C-1. X-ray diffraction from single crystal |

---

Structure type: Feldspar.(TC)-Albite. Temperature factors available  
The structure has been assigned a PDF number (calculated powder diffraction data): 01-089-6426  
Compound with mineral name: Albite (heat-treated)  
Structure type: Feldspar.(TC)-Albite  
Recording date: 12/16/00  
Mineral origin: Stintino, Sardinia, Italy  
ANX formula: ABC3X8  
Z: 4  
Calculated density: 2.63  
R value: 0.044  
Pearson code: aP26  
Wyckoff code: i13  
Structure TIDY: Transformed from space group: "C1-" to space group: "P -1".  
Structure TIDY: Applied Transformation matrix:  
Structure TIDY: -0.5, -0.5, 0  
Structure TIDY: 0.5, -0.5, 0  
Structure TIDY: 0, 0, 1  
Structure TIDY: TRANS c,b,-a origin 0 1/2 1/2  
Publication title: Order-disorder process in the tetrahedral sites of albite  
ICSD collection code: 87657  
Structure: Feldspar.(TC)-Albite  
Chemical Name: Sodium Tecto-alumotrisilicate  
Second Chemical Formula: Na (Al Si<sub>3</sub> O<sub>8</sub>)

## References

Structure: Cruciani, G.;Alberti, A.;Meneghinello, E., *American Mineralogist*, **84**, 1144 - 1151, (1999)

---

**Peak list**

| No. | h | k  | l  | d [Å]   | 2 $\theta$ [°] | I [%] |
|-----|---|----|----|---------|----------------|-------|
| 1   | 0 | 1  | -1 | 6.38020 | 13.869         | 8.0   |
| 2   | 1 | 0  | 0  | 6.36761 | 13.896         | 9.5   |
| 3   | 0 | 1  | 0  | 6.33656 | 13.965         | 4.9   |
| 4   | 0 | 0  | 1  | 6.31271 | 14.018         | 2.5   |
| 5   | 1 | 0  | -1 | 5.87727 | 15.062         | 6.0   |
| 6   | 1 | -1 | 0  | 5.60027 | 15.812         | 5.4   |
| 7   | 1 | 1  | -1 | 4.65717 | 19.041         | 0.3   |
| 8   | 1 | -1 | 1  | 4.37052 | 20.303         | 0.2   |
| 9   | 1 | -1 | -1 | 4.02895 | 22.045         | 100.0 |
| 10  | 1 | 1  | 0  | 3.85608 | 23.046         | 17.5  |
| 11  | 1 | 0  | 1  | 3.76451 | 23.615         | 40.6  |
| 12  | 0 | 2  | -1 | 3.67984 | 24.166         | 44.9  |
| 13  | 0 | 1  | -2 | 3.66583 | 24.260         | 26.4  |
| 14  | 1 | 1  | -2 | 3.64791 | 24.381         | 15.5  |
| 15  | 0 | 1  | 1  | 3.64100 | 24.428         | 0.0   |
| 16  | 2 | 0  | -1 | 3.48934 | 25.507         | 13.9  |
| 17  | 1 | 0  | -2 | 3.46220 | 25.710         | 5.1   |
| 18  | 1 | -2 | 1  | 3.45133 | 25.793         | 0.1   |
| 19  | 2 | -1 | 0  | 3.36736 | 26.448         | 17.0  |
| 20  | 1 | -2 | 0  | 3.35357 | 26.558         | 0.5   |
| 21  | 2 | -1 | -1 | 3.20909 | 27.777         | 74.7  |
| 22  | 0 | 2  | -2 | 3.19010 | 27.946         | 64.0  |
| 23  | 2 | 0  | 0  | 3.18380 | 28.003         | 99.9  |
| 24  | 0 | 2  | 0  | 3.16828 | 28.143         | 38.9  |
| 25  | 0 | 0  | 2  | 3.15636 | 28.251         | 35.8  |
| 26  | 1 | 2  | -1 | 2.97387 | 30.024         | 24.4  |
| 27  | 2 | 0  | -2 | 2.93864 | 30.393         | 14.7  |
| 28  | 1 | 2  | -2 | 2.92753 | 30.511         | 20.8  |
| 29  | 2 | 1  | -1 | 2.92388 | 30.550         | 12.6  |
| 30  | 1 | -1 | 2  | 2.85124 | 31.348         | 17.3  |
| 31  | 2 | 1  | -2 | 2.82610 | 31.634         | 5.1   |
| 32  | 2 | -2 | 0  | 2.80013 | 31.935         | 0.7   |
| 33  | 1 | -2 | 2  | 2.78237 | 32.145         | 0.8   |
| 34  | 2 | -1 | 1  | 2.77923 | 32.182         | 0.5   |
| 35  | 1 | 1  | 1  | 2.68621 | 33.328         | 0.1   |
| 36  | 1 | -1 | -2 | 2.65829 | 33.689         | 0.5   |
| 37  | 2 | -2 | 1  | 2.64092 | 33.917         | 9.9   |
| 38  | 1 | -2 | -1 | 2.63458 | 34.001         | 0.0   |

|    |   |    |    |         |        |      |
|----|---|----|----|---------|--------|------|
| 39 | 1 | 1  | -3 | 2.54513 | 35.234 | 22.0 |
| 40 | 2 | -1 | -2 | 2.53019 | 35.449 | 3.9  |
| 41 | 2 | 1  | 0  | 2.50844 | 35.767 | 2.0  |
| 42 | 1 | 2  | 0  | 2.50272 | 35.852 | 2.1  |
| 43 | 2 | -2 | -1 | 2.48540 | 36.110 | 1.6  |
| 44 | 1 | -3 | 1  | 2.45914 | 36.509 | 16.0 |
| 45 | 1 | 0  | 2  | 2.44959 | 36.656 | 1.9  |
| 46 | 1 | 2  | -3 | 2.42197 | 37.090 | 5.8  |
| 47 | 0 | 3  | -2 | 2.41175 | 37.253 | 1.4  |
| 48 | 0 | 2  | -3 | 2.40517 | 37.358 | 0.0  |
| 49 | 0 | 3  | -1 | 2.40464 | 37.367 | 2.9  |
| 50 | 0 | 1  | -3 | 2.39422 | 37.535 | 5.4  |
| 51 | 0 | 2  | 1  | 2.38649 | 37.662 | 3.6  |
| 52 | 0 | 1  | 2  | 2.38266 | 37.725 | 2.9  |
| 53 | 3 | -1 | -1 | 2.34450 | 38.362 | 0.2  |
| 54 | 2 | 1  | -3 | 2.33362 | 38.548 | 0.0  |
| 55 | 2 | 2  | -2 | 2.32859 | 38.635 | 0.5  |
| 56 | 3 | 0  | -1 | 2.32721 | 38.659 | 0.2  |
| 57 | 1 | -3 | 2  | 2.32402 | 38.714 | 2.1  |
| 58 | 1 | 0  | -3 | 2.30579 | 39.032 | 9.6  |
| 59 | 3 | -1 | 0  | 2.27143 | 39.647 | 1.9  |
| 60 | 1 | -3 | 0  | 2.26015 | 39.853 | 3.4  |
| 61 | 3 | 0  | -2 | 2.25017 | 40.038 | 0.3  |
| 62 | 2 | 0  | -3 | 2.23800 | 40.265 | 0.2  |
| 63 | 2 | 2  | -1 | 2.22705 | 40.471 | 1.4  |
| 64 | 2 | -3 | 1  | 2.19737 | 41.042 | 1.7  |
| 65 | 1 | 3  | -2 | 2.19252 | 41.137 | 4.5  |
| 66 | 2 | -2 | 2  | 2.18526 | 41.280 | 2.2  |
| 67 | 3 | -2 | 0  | 2.15422 | 41.903 | 1.4  |
| 68 | 2 | -3 | 0  | 2.14819 | 42.026 | 0.2  |
| 69 | 2 | 2  | -3 | 2.14466 | 42.099 | 0.5  |
| 70 | 3 | -1 | -2 | 2.13093 | 42.383 | 0.3  |
| 71 | 2 | -1 | 2  | 2.12753 | 42.454 | 0.0  |
| 72 | 0 | 3  | -3 | 2.12673 | 42.471 | 11.7 |
| 73 | 3 | 0  | 0  | 2.12254 | 42.559 | 0.7  |
| 74 | 0 | 3  | 0  | 2.11219 | 42.777 | 0.4  |
| 75 | 1 | -2 | 3  | 2.11014 | 42.821 | 4.9  |
| 76 | 0 | 0  | 3  | 2.10424 | 42.947 | 1.7  |
| 77 | 3 | -2 | -1 | 2.08957 | 43.264 | 2.5  |
| 78 | 1 | 3  | -1 | 2.08583 | 43.345 | 8.1  |



---

|     |   |    |    |         |        |      |
|-----|---|----|----|---------|--------|------|
| 79  | 1 | 3  | -3 | 2.05679 | 43.989 | 0.1  |
| 80  | 3 | 1  | -1 | 2.05341 | 44.065 | 0.2  |
| 81  | 1 | -1 | 3  | 2.02506 | 44.715 | 1.7  |
| 82  | 2 | -2 | -2 | 2.01447 | 44.963 | 1.9  |
| 83  | 2 | -3 | 2  | 2.00926 | 45.086 | 0.3  |
| 84  | 1 | -2 | -2 | 2.00235 | 45.250 | 2.0  |
| 85  | 2 | 1  | 1  | 1.99575 | 45.408 | 0.9  |
| 86  | 3 | -2 | 1  | 1.99151 | 45.510 | 1.4  |
| 87  | 1 | -3 | 3  | 1.97981 | 45.794 | 4.5  |
| 88  | 3 | -1 | 1  | 1.97680 | 45.868 | 1.2  |
| 89  | 1 | 2  | 1  | 1.97480 | 45.917 | 1.0  |
| 90  | 1 | 1  | 2  | 1.96075 | 46.265 | 0.6  |
| 91  | 3 | 0  | -3 | 1.95909 | 46.307 | 0.8  |
| 92  | 3 | 1  | -3 | 1.95289 | 46.462 | 0.1  |
| 93  | 2 | -1 | -3 | 1.94077 | 46.770 | 1.8  |
| 94  | 2 | 2  | 0  | 1.92804 | 47.097 | 3.6  |
| 95  | 1 | -1 | -3 | 1.91879 | 47.338 | 0.1  |
| 96  | 1 | 2  | -4 | 1.90880 | 47.601 | 0.0  |
| 97  | 1 | -3 | -1 | 1.90227 | 47.774 | 0.1  |
| 98  | 2 | -3 | -1 | 1.90182 | 47.786 | 10.0 |
| 99  | 2 | 0  | 2  | 1.88226 | 48.315 | 7.6  |
| 100 | 1 | 1  | -4 | 1.87715 | 48.454 | 1.8  |
| 101 | 3 | -3 | 0  | 1.86676 | 48.742 | 0.1  |
| 102 | 1 | -4 | 2  | 1.85396 | 49.100 | 0.1  |
| 103 | 2 | 1  | -4 | 1.84983 | 49.217 | 0.1  |
| 104 | 3 | -2 | -2 | 1.84820 | 49.263 | 11.4 |
| 105 | 2 | 3  | -2 | 1.84600 | 49.326 | 0.1  |
| 106 | 0 | 4  | -2 | 1.83992 | 49.500 | 6.9  |
| 107 | 1 | -4 | 1  | 1.83623 | 49.606 | 0.5  |
| 108 | 0 | 2  | -4 | 1.83292 | 49.702 | 4.2  |
| 109 | 3 | -3 | 1  | 1.83131 | 49.748 | 0.2  |
| 110 | 3 | 1  | 0  | 1.82597 | 49.904 | 1.8  |
| 111 | 2 | 2  | -4 | 1.82396 | 49.963 | 1.8  |
| 112 | 2 | 3  | -3 | 1.82269 | 50.000 | 5.9  |
| 113 | 3 | 2  | -2 | 1.82122 | 50.043 | 4.7  |
| 114 | 0 | 2  | 2  | 1.82050 | 50.064 | 10.4 |
| 115 | 1 | 3  | 0  | 1.82010 | 50.076 | 0.8  |
| 116 | 3 | -1 | -3 | 1.79982 | 50.680 | 1.1  |
| 117 | 3 | 0  | 1  | 1.79755 | 50.748 | 8.1  |
| 118 | 1 | 0  | 3  | 1.78763 | 51.050 | 0.4  |

---

|     |   |    |    |         |        |      |
|-----|---|----|----|---------|--------|------|
| 119 | 3 | 2  | -3 | 1.78550 | 51.115 | 0.0  |
| 120 | 1 | 3  | -4 | 1.78192 | 51.225 | 0.3  |
| 121 | 4 | -1 | -1 | 1.77870 | 51.325 | 20.2 |
| 122 | 0 | 4  | -3 | 1.77017 | 51.590 | 1.4  |
| 123 | 0 | 3  | -4 | 1.76653 | 51.705 | 0.4  |
| 124 | 2 | -4 | 1  | 1.76599 | 51.721 | 0.1  |
| 125 | 0 | 4  | -1 | 1.76269 | 51.826 | 0.0  |
| 126 | 0 | 1  | -4 | 1.75500 | 52.070 | 0.0  |
| 127 | 0 | 3  | 1  | 1.75265 | 52.145 | 1.1  |
| 128 | 2 | -2 | 3  | 1.75243 | 52.152 | 0.7  |
| 129 | 3 | -3 | -1 | 1.75160 | 52.178 | 0.5  |
| 130 | 0 | 1  | 3  | 1.74861 | 52.274 | 2.5  |
| 131 | 4 | 0  | -2 | 1.74467 | 52.401 | 2.9  |
| 132 | 4 | -1 | -2 | 1.73145 | 52.832 | 0.0  |
| 133 | 2 | 0  | -4 | 1.73110 | 52.844 | 6.5  |
| 134 | 1 | -4 | 3  | 1.72650 | 52.995 | 0.4  |
| 135 | 2 | -4 | 2  | 1.72567 | 53.023 | 2.9  |
| 136 | 2 | 3  | -1 | 1.72495 | 53.047 | 3.3  |
| 137 | 4 | 0  | -1 | 1.72394 | 53.080 | 0.3  |
| 138 | 2 | -3 | 3  | 1.71882 | 53.251 | 2.5  |
| 139 | 3 | -2 | 2  | 1.71759 | 53.292 | 1.1  |
| 140 | 3 | 2  | -1 | 1.71625 | 53.337 | 2.0  |
| 141 | 1 | 0  | -4 | 1.70763 | 53.628 | 2.1  |
| 142 | 4 | -2 | -1 | 1.70130 | 53.843 | 0.0  |
| 143 | 4 | -1 | 0  | 1.69326 | 54.120 | 0.7  |
| 144 | 1 | 4  | -2 | 1.69230 | 54.153 | 0.2  |
| 145 | 3 | 1  | -4 | 1.69029 | 54.223 | 1.4  |
| 146 | 1 | 4  | -3 | 1.68524 | 54.398 | 0.5  |
| 147 | 1 | -4 | 0  | 1.68451 | 54.424 | 1.8  |
| 148 | 4 | -2 | 0  | 1.68368 | 54.453 | 2.8  |
| 149 | 2 | -4 | 0  | 1.67678 | 54.696 | 2.2  |
| 150 | 2 | 3  | -4 | 1.66957 | 54.952 | 1.8  |
| 151 | 3 | -3 | 2  | 1.66764 | 55.021 | 0.3  |
| 152 | 2 | -1 | 3  | 1.66073 | 55.269 | 4.2  |
| 153 | 3 | -1 | 2  | 1.64806 | 55.731 | 0.5  |
| 154 | 1 | -2 | 4  | 1.64359 | 55.896 | 0.0  |
| 155 | 4 | 0  | -3 | 1.64228 | 55.944 | 0.5  |
| 156 | 4 | 1  | -2 | 1.63670 | 56.152 | 0.8  |
| 157 | 3 | 0  | -4 | 1.63564 | 56.191 | 0.1  |
| 158 | 1 | -3 | 4  | 1.63236 | 56.314 | 0.6  |

---

|     |   |    |    |         |        |     |
|-----|---|----|----|---------|--------|-----|
| 159 | 3 | 2  | -4 | 1.63073 | 56.376 | 0.3 |
| 160 | 2 | -2 | -3 | 1.61978 | 56.791 | 0.1 |
| 161 | 2 | -3 | -2 | 1.60863 | 57.221 | 0.1 |
| 162 | 2 | 2  | 1  | 1.60834 | 57.232 | 0.1 |
| 163 | 4 | -2 | -2 | 1.60455 | 57.380 | 0.0 |
| 164 | 4 | 1  | -3 | 1.60105 | 57.517 | 0.0 |
| 165 | 0 | 4  | -4 | 1.59505 | 57.754 | 2.2 |
| 166 | 2 | 1  | 2  | 1.59436 | 57.782 | 0.0 |
| 167 | 3 | -4 | 1  | 1.59307 | 57.833 | 3.0 |
| 168 | 4 | 0  | 0  | 1.59190 | 57.879 | 1.0 |
| 169 | 1 | 4  | -1 | 1.58823 | 58.026 | 1.7 |
| 170 | 0 | 4  | 0  | 1.58414 | 58.190 | 0.5 |
| 171 | 2 | -4 | 3  | 1.57886 | 58.403 | 0.0 |
| 172 | 4 | -1 | -3 | 1.57869 | 58.410 | 2.7 |
| 173 | 0 | 0  | 4  | 1.57818 | 58.431 | 0.1 |
| 174 | 1 | 2  | 2  | 1.57451 | 58.580 | 0.6 |
| 175 | 1 | -2 | -3 | 1.57146 | 58.705 | 0.7 |
| 176 | 1 | 4  | -4 | 1.57091 | 58.727 | 1.9 |
| 177 | 4 | -3 | 0  | 1.56834 | 58.833 | 0.1 |
| 178 | 4 | 1  | -1 | 1.56809 | 58.843 | 3.2 |
| 179 | 1 | -3 | -2 | 1.56725 | 58.878 | 1.4 |
| 180 | 3 | -4 | 0  | 1.56508 | 58.968 | 0.3 |
| 181 | 4 | -2 | 1  | 1.56133 | 59.124 | 0.6 |
| 182 | 3 | 1  | 1  | 1.55629 | 59.334 | 1.1 |
| 183 | 1 | -1 | 4  | 1.55252 | 59.492 | 2.9 |
| 184 | 3 | 3  | -3 | 1.55239 | 59.498 | 0.0 |
| 185 | 3 | -3 | -2 | 1.55212 | 59.509 | 1.6 |
| 186 | 1 | 3  | 1  | 1.53562 | 60.215 | 0.2 |
| 187 | 4 | -3 | -1 | 1.53444 | 60.266 | 1.8 |
| 188 | 2 | -1 | -4 | 1.53398 | 60.285 | 0.5 |
| 189 | 3 | 2  | 0  | 1.52909 | 60.498 | 1.5 |
| 190 | 3 | 3  | -2 | 1.52818 | 60.538 | 0.1 |
| 191 | 1 | 2  | -5 | 1.52742 | 60.572 | 0.1 |
| 192 | 2 | 3  | 0  | 1.52693 | 60.593 | 0.3 |
| 193 | 3 | -4 | 2  | 1.52499 | 60.678 | 0.5 |
| 194 | 1 | -4 | 4  | 1.52461 | 60.695 | 0.0 |
| 195 | 4 | -1 | 1  | 1.52204 | 60.809 | 0.8 |
| 196 | 1 | 1  | 3  | 1.52177 | 60.820 | 0.0 |
| 197 | 2 | 2  | -5 | 1.51803 | 60.986 | 0.6 |
| 198 | 2 | 4  | -3 | 1.51722 | 61.022 | 1.1 |

---

|     |   |    |    |         |        |     |
|-----|---|----|----|---------|--------|-----|
| 199 | 4 | -3 | 1  | 1.51000 | 61.345 | 2.0 |
| 200 | 2 | -4 | -1 | 1.50605 | 61.524 | 0.3 |
| 201 | 1 | 3  | -5 | 1.50130 | 61.739 | 3.6 |
| 202 | 1 | -5 | 2  | 1.49649 | 61.960 | 0.0 |
| 203 | 3 | 0  | 2  | 1.49540 | 62.010 | 0.1 |

---

## Structure

| No. | Name | Element | X       | Y       | Z       | Biso   | sof    | Wyck. |
|-----|------|---------|---------|---------|---------|--------|--------|-------|
| 1   | O1   | O       | 0.28030 | 0.09750 | 0.08850 | 1.0100 | 1.0000 | 2i    |
| 2   | AL1  | Al      | 0.21050 | 0.34080 | 0.67700 | 0.7800 | 0.7800 | 2i    |
| 3   | SI1  | Si      | 0.23480 | 0.68540 | 0.32240 | 0.7400 | 0.9200 | 2i    |
| 4   | AL2  | Al      | 0.23480 | 0.68540 | 0.32240 | 0.7400 | 0.0800 | 2i    |
| 5   | SI2  | Si      | 0.31720 | 0.08210 | 0.30210 | 0.7700 | 0.9400 | 2i    |
| 6   | AL3  | Al      | 0.31720 | 0.08210 | 0.30210 | 0.7700 | 0.0600 | 2i    |
| 7   | SI3  | Si      | 0.35850 | 0.30300 | 0.06440 | 0.7500 | 0.9200 | 2i    |
| 8   | SI4  | Si      | 0.21050 | 0.34080 | 0.67700 | 0.7800 | 0.2200 | 2i    |
| 9   | O2   | O       | 0.02720 | 0.62740 | 0.36120 | 1.3800 | 1.0000 | 2i    |
| 10  | NA1  | Na      | 0.85590 | 0.22330 | 0.23590 | 4.1100 | 1.0000 | 2i    |
| 11  | O3   | O       | 0.19330 | 0.20440 | 0.42620 | 1.4500 | 1.0000 | 2i    |
| 12  | O4   | O       | 0.25460 | 0.47050 | 0.17070 | 1.5600 | 1.0000 | 2i    |
| 13  | O5   | O       | 0.27200 | 0.21480 | 0.81320 | 1.2800 | 1.0000 | 2i    |
| 14  | O6   | O       | 0.22790 | 0.83170 | 0.21570 | 1.2400 | 1.0000 | 2i    |
| 15  | O7   | O       | 0.61180 | 0.40670 | 0.18630 | 1.2600 | 1.0000 | 2i    |
| 16  | O8   | O       | 0.56760 | 0.18400 | 0.44760 | 1.4200 | 1.0000 | 2i    |
| 17  | AL4  | Al      | 0.35850 | 0.30300 | 0.06440 | 0.7500 | 0.0800 | 2i    |

---

**Stick Pattern**

Intensity [%]

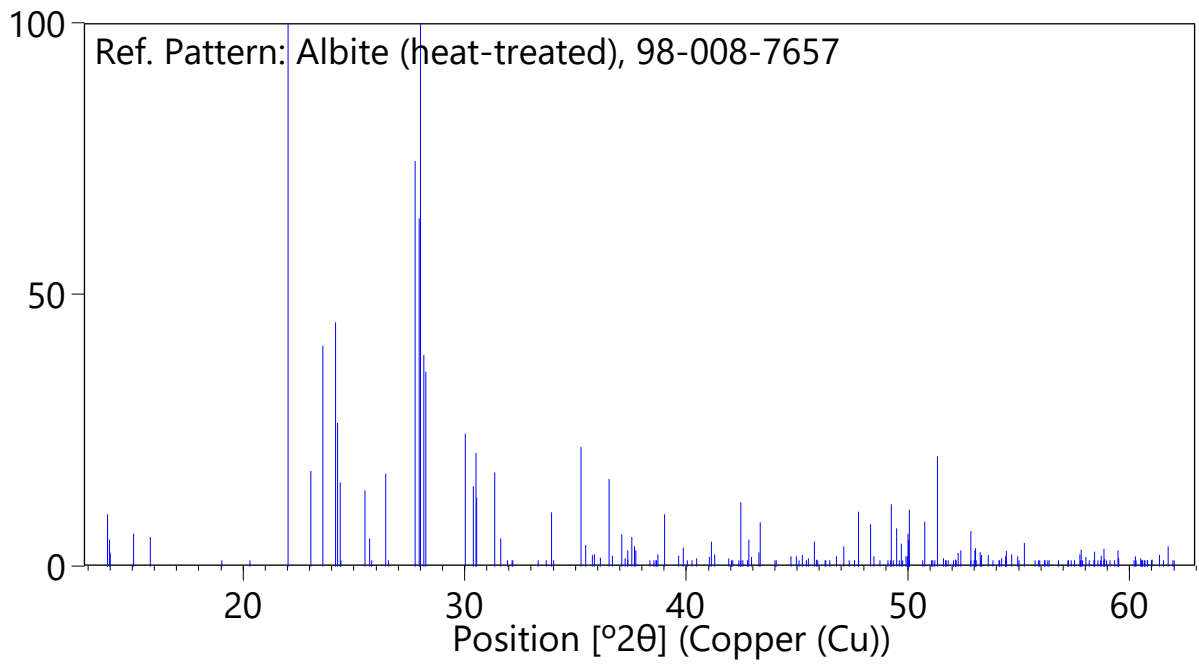

---

## Name and formula

Reference code: 98-020-1648

Mineral name: Anorthite, sodian  
Compound name: Anorthite, sodian  
Common name: Anorthite, sodian

Chemical formula:  $\text{Al}_{1.66}\text{Ca}_{0.66}\text{Na}_{0.34}\text{O}_8\text{Si}_{2.34}$

## Crystallographic parameters

Crystal system: Anorthic  
Space group: P -1  
Space group number: 2

a (Å): 8.1750  
b (Å): 8.7850  
c (Å): 9.4430  
Alpha (°): 89.7650  
Beta (°): 83.8200  
Gamma (°): 84.1130

Calculated density (g/cm<sup>3</sup>): 2.70  
Measured density (g/cm<sup>3</sup>): 2.70  
Volume of cell (10<sup>6</sup> pm<sup>3</sup>): 670.66  
Z: 8.00

RIR: 0.58

## Subfiles and quality

Subfiles: User Inorganic, User Mineral  
Quality: User From Structure (=)

## Comments

Creation Date: 7/17/1985  
Modification Date: 2/1/2015

---

Cross-References: ICSD:201648, ICDD:00-018-1202, PANICSD:98-020-1648  
Original ICSD space group: I-1  
Mean T-O: 1.640, 1.726, 1.703, 1.625, 1.695, 1.625, 1.626, 1.702, for average structure cf. 100237. X-ray diffraction from single crystal  
Structure type: Feldspar.(TC,I1-,i28)-Bytownite. Temperature factors available  
The structure has been assigned a PDF number (experimental powder diffraction data): 18-1202  
The structure has been assigned a PDF number (calculated powder diffraction data): 01-086-1650  
Compound with mineral name: Anorthite, sodian  
Structure type: Feldspar.(TC,I1-,i28)-Bytownite  
Recording date: 07/17/85  
Modification date: 02/01/15  
Additional name: Labradorite An66  
Mineral origin: Plush, Lake Co., Oregon  
ANX formula: AB2C2X8  
Z: 8  
Authors density: 2.7  
Calculated density: 2.7  
R value: 0.0293  
Pearson code: aP52  
Wyckoff code: i28  
PDF code: 00-018-1202  
Structure TIDY: Transformed from space group: "I1-" to space group: "P -1".  
Structure TIDY: Applied Transformation matrix:  
Structure TIDY: -1, 0, 0  
Structure TIDY: 0.5, -0.5, 0.5  
Structure TIDY: 0.5, 0.5, 0.5  
Structure TIDY: TRANS -a,c,b origin 1/2 1/2 1/2  
Publication title: Analysis of P1-, I1-, and C1- plagioclase structures  
ICSD collection code: 201648  
Structure: Feldspar.(TC,I1-,i28)-Bytownite  
Chemical Name: Calcium Sodium Tecto-alumosilicate \*  
Second Chemical Formula: Ca0.66 Na0.34 (Al1.66 Si2.34 O8)

## References

Structure: Kroll, H.;Wenk, H.R., *Bulletin de Mineralogie (101,1978-)*, **107**, 467 - 487, (1984)



---

**Peak list**

| No. | h | k  | l  | d [Å]   | 2 $\theta$ [°] | I [%] |
|-----|---|----|----|---------|----------------|-------|
| 1   | 0 | 0  | 1  | 9.38789 | 9.413          | 0.5   |
| 2   | 0 | 1  | 0  | 8.73845 | 10.114         | 0.0   |
| 3   | 1 | 0  | 0  | 8.08450 | 10.935         | 0.0   |
| 4   | 1 | 0  | 1  | 6.48124 | 13.652         | 8.1   |
| 5   | 0 | 1  | -1 | 6.41880 | 13.785         | 0.1   |
| 6   | 0 | 1  | 1  | 6.37403 | 13.882         | 0.2   |
| 7   | 1 | 1  | 0  | 6.26375 | 14.128         | 0.2   |
| 8   | 1 | 0  | -1 | 5.82347 | 15.202         | 2.0   |
| 9   | 1 | -1 | 0  | 5.65198 | 15.666         | 0.5   |
| 10  | 1 | 1  | 1  | 5.41018 | 16.371         | 0.0   |
| 11  | 1 | 1  | -1 | 5.03129 | 17.613         | 0.9   |
| 12  | 1 | -1 | 1  | 5.02274 | 17.644         | 0.3   |
| 13  | 0 | 0  | 2  | 4.69395 | 18.890         | 10.1  |
| 14  | 1 | -1 | -1 | 4.67973 | 18.948         | 0.0   |
| 15  | 0 | 2  | 0  | 4.36923 | 20.309         | 0.0   |
| 16  | 1 | 0  | 2  | 4.26383 | 20.816         | 0.4   |
| 17  | 0 | 1  | -2 | 4.14728 | 21.408         | 0.6   |
| 18  | 0 | 1  | 2  | 4.12308 | 21.535         | 0.1   |
| 19  | 2 | 0  | 0  | 4.04225 | 21.971         | 75.0  |
| 20  | 1 | 2  | 0  | 4.02041 | 22.092         | 0.3   |
| 21  | 0 | 2  | -1 | 3.97190 | 22.365         | 0.1   |
| 22  | 0 | 2  | 1  | 3.95063 | 22.487         | 0.8   |
| 23  | 1 | 1  | 2  | 3.90629 | 22.746         | 16.0  |
| 24  | 1 | 0  | -2 | 3.88169 | 22.892         | 0.5   |
| 25  | 2 | 0  | 1  | 3.86722 | 22.979         | 0.0   |
| 26  | 2 | 1  | 0  | 3.82136 | 23.258         | 0.1   |
| 27  | 1 | -1 | 2  | 3.76178 | 23.632         | 36.2  |
| 28  | 1 | 2  | 1  | 3.76049 | 23.640         | 25.0  |
| 29  | 1 | -2 | 0  | 3.68857 | 24.108         | 0.5   |
| 30  | 2 | 1  | 1  | 3.66825 | 24.244         | 0.3   |
| 31  | 1 | 2  | -1 | 3.63427 | 24.474         | 36.1  |
| 32  | 1 | 1  | -2 | 3.62230 | 24.556         | 12.0  |
| 33  | 2 | 0  | -1 | 3.57534 | 24.884         | 0.3   |
| 34  | 2 | -1 | 0  | 3.53305 | 25.186         | 0.0   |
| 35  | 1 | -2 | 1  | 3.49935 | 25.433         | 1.5   |
| 36  | 1 | -1 | -2 | 3.47705 | 25.599         | 14.0  |
| 37  | 2 | 1  | -1 | 3.42320 | 26.009         | 5.6   |
| 38  | 2 | -1 | 1  | 3.41780 | 26.050         | 0.8   |

---

|    |   |    |    |         |        |       |
|----|---|----|----|---------|--------|-------|
| 39 | 1 | -2 | -1 | 3.37045 | 26.423 | 27.2  |
| 40 | 2 | 0  | 2  | 3.24062 | 27.502 | 54.2  |
| 41 | 0 | 2  | -2 | 3.20940 | 27.775 | 59.9  |
| 42 | 2 | -1 | -1 | 3.20566 | 27.808 | 100.0 |
| 43 | 0 | 2  | 2  | 3.18702 | 27.974 | 95.4  |
| 44 | 2 | 2  | 0  | 3.13187 | 28.477 | 42.4  |
| 45 | 0 | 0  | 3  | 3.12930 | 28.500 | 0.1   |
| 46 | 1 | 2  | 2  | 3.12720 | 28.520 | 0.0   |
| 47 | 2 | 1  | 2  | 3.11823 | 28.604 | 0.1   |
| 48 | 2 | 2  | 1  | 3.04349 | 29.322 | 0.0   |
| 49 | 1 | 0  | 3  | 3.03035 | 29.452 | 21.9  |
| 50 | 1 | 2  | -2 | 2.98474 | 29.912 | 0.0   |
| 51 | 1 | -2 | 2  | 2.98116 | 29.949 | 0.1   |
| 52 | 2 | -1 | 2  | 2.96443 | 30.122 | 0.1   |
| 53 | 0 | 1  | -3 | 2.95267 | 30.245 | 28.7  |
| 54 | 0 | 1  | 3  | 2.93955 | 30.383 | 19.0  |
| 55 | 0 | 3  | 0  | 2.91282 | 30.669 | 0.0   |
| 56 | 2 | 0  | -2 | 2.91174 | 30.680 | 9.9   |
| 57 | 2 | 2  | -1 | 2.90329 | 30.772 | 0.2   |
| 58 | 1 | 1  | 3  | 2.89160 | 30.899 | 0.0   |
| 59 | 1 | -1 | 3  | 2.83538 | 31.528 | 0.0   |
| 60 | 1 | 3  | 0  | 2.83481 | 31.534 | 24.1  |
| 61 | 2 | 1  | -2 | 2.82971 | 31.593 | 0.0   |
| 62 | 2 | -2 | 0  | 2.82599 | 31.635 | 0.4   |
| 63 | 1 | 0  | -3 | 2.81784 | 31.729 | 8.9   |
| 64 | 0 | 3  | -1 | 2.78753 | 32.084 | 0.2   |
| 65 | 0 | 3  | 1  | 2.77647 | 32.215 | 0.1   |
| 66 | 2 | -2 | 1  | 2.76777 | 32.319 | 0.1   |
| 67 | 1 | 3  | 1  | 2.73735 | 32.688 | 0.0   |
| 68 | 1 | 1  | -3 | 2.71547 | 32.959 | 0.0   |
| 69 | 2 | 2  | 2  | 2.70509 | 33.089 | 0.2   |
| 70 | 2 | -1 | -2 | 2.69971 | 33.157 | 0.3   |
| 71 | 3 | 0  | 0  | 2.69483 | 33.218 | 0.0   |
| 72 | 1 | 3  | -1 | 2.69082 | 33.269 | 0.0   |
| 73 | 3 | 0  | 1  | 2.66761 | 33.567 | 0.8   |
| 74 | 1 | -3 | 0  | 2.65479 | 33.734 | 14.8  |
| 75 | 3 | 1  | 0  | 2.65305 | 33.757 | 0.4   |
| 76 | 1 | -1 | -3 | 2.64945 | 33.804 | 0.2   |
| 77 | 2 | -2 | -1 | 2.64827 | 33.820 | 0.0   |
| 78 | 3 | 1  | 1  | 2.62552 | 34.122 | 0.0   |

---

|     |   |    |    |         |        |      |
|-----|---|----|----|---------|--------|------|
| 79  | 2 | 0  | 3  | 2.61466 | 34.268 | 0.0  |
| 80  | 1 | -3 | 1  | 2.58303 | 34.701 | 0.1  |
| 81  | 0 | 2  | -3 | 2.55259 | 35.128 | 0.1  |
| 82  | 2 | 1  | 3  | 2.54768 | 35.198 | 3.8  |
| 83  | 0 | 2  | 3  | 2.53568 | 35.370 | 0.1  |
| 84  | 1 | 2  | 3  | 2.52788 | 35.483 | 5.7  |
| 85  | 1 | -3 | -1 | 2.52710 | 35.494 | 0.0  |
| 86  | 3 | 0  | -1 | 2.51921 | 35.609 | 4.5  |
| 87  | 2 | 2  | -2 | 2.51565 | 35.661 | 31.8 |
| 88  | 2 | -2 | 2  | 2.51137 | 35.724 | 20.5 |
| 89  | 3 | -1 | 0  | 2.50375 | 35.836 | 1.7  |
| 90  | 2 | 3  | 0  | 2.48749 | 36.079 | 0.0  |
| 91  | 3 | 1  | -1 | 2.48629 | 36.097 | 0.0  |
| 92  | 3 | -1 | 1  | 2.48319 | 36.143 | 0.0  |
| 93  | 0 | 3  | -2 | 2.48282 | 36.149 | 0.0  |
| 94  | 0 | 3  | 2  | 2.46726 | 36.385 | 0.1  |
| 95  | 2 | -1 | 3  | 2.46427 | 36.430 | 2.1  |
| 96  | 1 | 3  | 2  | 2.46057 | 36.487 | 0.5  |
| 97  | 1 | -2 | 3  | 2.45389 | 36.590 | 0.5  |
| 98  | 2 | 3  | 1  | 2.44126 | 36.786 | 3.6  |
| 99  | 3 | 1  | 2  | 2.41998 | 37.121 | 4.2  |
| 100 | 1 | 2  | -3 | 2.41486 | 37.203 | 4.1  |
| 101 | 3 | 2  | 0  | 2.40677 | 37.332 | 0.1  |
| 102 | 1 | 3  | -2 | 2.39403 | 37.539 | 0.6  |
| 103 | 3 | 2  | 1  | 2.38500 | 37.686 | 3.5  |
| 104 | 2 | 3  | -1 | 2.36937 | 37.944 | 3.5  |
| 105 | 3 | -1 | -1 | 2.35990 | 38.102 | 0.0  |
| 106 | 2 | 0  | -3 | 2.35464 | 38.191 | 0.0  |
| 107 | 1 | -3 | 2  | 2.35334 | 38.213 | 3.3  |
| 108 | 0 | 0  | 4  | 2.34697 | 38.320 | 0.0  |
| 109 | 2 | -2 | -2 | 2.33987 | 38.441 | 0.0  |
| 110 | 1 | -2 | -3 | 2.32390 | 38.716 | 0.9  |
| 111 | 1 | 0  | 4  | 2.32193 | 38.750 | 0.0  |
| 112 | 2 | 1  | -3 | 2.31168 | 38.929 | 0.4  |
| 113 | 3 | -1 | 2  | 2.30928 | 38.971 | 6.2  |
| 114 | 2 | 2  | 3  | 2.30601 | 39.028 | 0.1  |
| 115 | 3 | 2  | -1 | 2.28122 | 39.470 | 5.8  |
| 116 | 1 | -3 | -2 | 2.27050 | 39.664 | 3.8  |
| 117 | 0 | 1  | 4  | 2.26267 | 39.807 | 0.1  |
| 118 | 1 | 1  | 4  | 2.25673 | 39.916 | 1.5  |

|     |   |    |    |         |        |      |
|-----|---|----|----|---------|--------|------|
| 119 | 2 | -3 | 0  | 2.25583 | 39.933 | 0.0  |
| 120 | 2 | 3  | 2  | 2.25496 | 39.949 | 0.0  |
| 121 | 2 | -1 | -3 | 2.23725 | 40.279 | 0.0  |
| 122 | 3 | 0  | -2 | 2.23533 | 40.315 | 0.0  |
| 123 | 1 | -1 | 4  | 2.23160 | 40.385 | 4.0  |
| 124 | 2 | -3 | 1  | 2.22683 | 40.476 | 2.6  |
| 125 | 3 | 1  | -2 | 2.21317 | 40.737 | 0.7  |
| 126 | 3 | -2 | 0  | 2.19511 | 41.087 | 0.1  |
| 127 | 1 | 0  | -4 | 2.19155 | 41.156 | 0.1  |
| 128 | 2 | -2 | 3  | 2.18601 | 41.265 | 0.1  |
| 129 | 0 | 4  | 0  | 2.18461 | 41.293 | 1.8  |
| 130 | 3 | -2 | 1  | 2.18210 | 41.343 | 0.7  |
| 131 | 1 | 4  | 0  | 2.16574 | 41.670 | 0.0  |
| 132 | 2 | -3 | -1 | 2.16143 | 41.757 | 2.6  |
| 133 | 3 | 0  | 3  | 2.16041 | 41.777 | 1.8  |
| 134 | 2 | 3  | -2 | 2.14503 | 42.091 | 0.1  |
| 135 | 1 | 1  | -4 | 2.14318 | 42.129 | 1.3  |
| 136 | 0 | 3  | -3 | 2.13960 | 42.203 | 9.0  |
| 137 | 3 | 1  | 3  | 2.13620 | 42.273 | 0.0  |
| 138 | 1 | 3  | 3  | 2.13407 | 42.317 | 0.0  |
| 139 | 2 | 0  | 4  | 2.13191 | 42.362 | 13.4 |
| 140 | 2 | 2  | -3 | 2.13158 | 42.369 | 0.1  |
| 141 | 0 | 4  | -1 | 2.13107 | 42.380 | 0.0  |
| 142 | 0 | 3  | 3  | 2.12468 | 42.514 | 0.4  |
| 143 | 3 | -1 | -2 | 2.12098 | 42.591 | 0.0  |
| 144 | 1 | 4  | 1  | 2.12052 | 42.601 | 0.4  |
| 145 | 1 | -1 | -4 | 2.10867 | 42.852 | 0.0  |
| 146 | 1 | 4  | -1 | 2.10025 | 43.032 | 9.6  |
| 147 | 3 | -2 | -1 | 2.09545 | 43.136 | 1.6  |
| 148 | 2 | 1  | 4  | 2.09435 | 43.160 | 0.1  |
| 149 | 3 | 3  | 0  | 2.08792 | 43.300 | 1.2  |
| 150 | 2 | -3 | 2  | 2.08738 | 43.311 | 0.0  |
| 151 | 0 | 2  | -4 | 2.07364 | 43.613 | 0.1  |
| 152 | 3 | 3  | 1  | 2.07289 | 43.629 | 0.0  |
| 153 | 1 | 2  | 4  | 2.06982 | 43.697 | 0.1  |
| 154 | 1 | 3  | -3 | 2.06928 | 43.709 | 0.0  |
| 155 | 1 | -3 | 3  | 2.06750 | 43.749 | 0.0  |
| 156 | 3 | 2  | -2 | 2.06556 | 43.792 | 0.0  |
| 157 | 3 | -2 | 2  | 2.06201 | 43.872 | 0.0  |
| 158 | 0 | 2  | 4  | 2.06154 | 43.882 | 0.1  |

|     |   |    |    |         |        |      |
|-----|---|----|----|---------|--------|------|
| 159 | 3 | -1 | 3  | 2.06039 | 43.908 | 0.0  |
| 160 | 1 | -4 | 0  | 2.05644 | 43.996 | 0.0  |
| 161 | 2 | -1 | 4  | 2.04874 | 44.171 | 0.1  |
| 162 | 1 | -2 | 4  | 2.03148 | 44.566 | 0.1  |
| 163 | 1 | -4 | 1  | 2.02325 | 44.757 | 1.3  |
| 164 | 4 | 0  | 0  | 2.02112 | 44.807 | 2.8  |
| 165 | 2 | -2 | -3 | 2.01863 | 44.865 | 0.2  |
| 166 | 4 | 1  | 0  | 2.01511 | 44.948 | 0.0  |
| 167 | 4 | 1  | 1  | 2.01448 | 44.963 | 3.4  |
| 168 | 2 | 4  | 0  | 2.01021 | 45.063 | 0.4  |
| 169 | 2 | 3  | 3  | 2.00713 | 45.136 | 0.8  |
| 170 | 3 | 3  | -1 | 2.00504 | 45.186 | 0.0  |
| 171 | 3 | 2  | 3  | 1.99914 | 45.327 | 1.8  |
| 172 | 1 | -4 | -1 | 1.99468 | 45.434 | 2.5  |
| 173 | 1 | 2  | -4 | 1.98651 | 45.631 | 0.0  |
| 174 | 0 | 4  | -2 | 1.98595 | 45.645 | 4.4  |
| 175 | 2 | 4  | 1  | 1.98490 | 45.670 | 0.0  |
| 176 | 1 | -3 | -3 | 1.98393 | 45.694 | 0.0  |
| 177 | 2 | -3 | -2 | 1.98307 | 45.715 | 0.0  |
| 178 | 0 | 4  | 2  | 1.97532 | 45.904 | 0.8  |
| 179 | 3 | 3  | 2  | 1.96586 | 46.138 | 1.9  |
| 180 | 2 | 2  | 4  | 1.95315 | 46.456 | 2.7  |
| 181 | 1 | 4  | -2 | 1.95032 | 46.527 | 0.1  |
| 182 | 2 | 4  | -1 | 1.94694 | 46.612 | 0.0  |
| 183 | 3 | 0  | -3 | 1.94116 | 46.760 | 1.4  |
| 184 | 2 | 0  | -4 | 1.94085 | 46.768 | 0.9  |
| 185 | 4 | 0  | 2  | 1.93361 | 46.953 | 0.1  |
| 186 | 1 | -2 | -4 | 1.93248 | 46.982 | 0.2  |
| 187 | 4 | 1  | -1 | 1.92878 | 47.078 | 3.8  |
| 188 | 3 | 1  | -3 | 1.92720 | 47.119 | 0.1  |
| 189 | 4 | -1 | 1  | 1.92685 | 47.128 | 10.5 |
| 190 | 4 | -1 | 0  | 1.92618 | 47.145 | 0.1  |
| 191 | 3 | -2 | -2 | 1.92220 | 47.249 | 0.0  |
| 192 | 2 | 1  | -4 | 1.91718 | 47.380 | 0.0  |
| 193 | 4 | 2  | 0  | 1.91068 | 47.551 | 1.2  |
| 194 | 4 | 2  | 1  | 1.90955 | 47.581 | 0.1  |
| 195 | 1 | -4 | 2  | 1.90762 | 47.632 | 0.0  |
| 196 | 2 | 3  | -3 | 1.89240 | 48.039 | 1.0  |
| 197 | 2 | -3 | 3  | 1.88967 | 48.113 | 0.1  |
| 198 | 3 | -3 | 0  | 1.88399 | 48.267 | 0.0  |

---

|     |   |    |   |         |        |     |
|-----|---|----|---|---------|--------|-----|
| 199 | 2 | -2 | 4 | 1.88089 | 48.352 | 5.0 |
| 200 | 2 | 4  | 2 | 1.88025 | 48.369 | 7.5 |
| 201 | 3 | -2 | 3 | 1.87959 | 48.388 | 1.3 |
| 202 | 0 | 0  | 5 | 1.87758 | 48.443 | 0.0 |
| 203 | 3 | -3 | 1 | 1.87631 | 48.477 | 0.0 |

## Structure

| No. | Name | Element | X       | Y       | Z       | Biso   | sof    | Wyck. |
|-----|------|---------|---------|---------|---------|--------|--------|-------|
| 1   | NA1  | Na      | 0.22220 | 0.07440 | 0.02040 | 0.5000 | 0.2100 | 2i    |
| 2   | SI1  | Si      | 0.52218 | 0.26548 | 0.05196 | 0.5000 | 1.0000 | 2i    |
| 3   | SI2  | Si      | 0.02933 | 0.76933 | 0.54749 | 0.5000 | 0.3000 | 2i    |
| 4   | AL1  | Al      | 0.02933 | 0.76933 | 0.54749 | 0.5000 | 0.7000 | 2i    |
| 5   | SI3  | Si      | 0.10871 | 0.06942 | 0.70378 | 0.5000 | 1.0000 | 2i    |
| 6   | SI4  | Si      | 0.61712 | 0.56652 | 0.19782 | 0.5000 | 0.2000 | 2i    |
| 7   | AL2  | Al      | 0.61712 | 0.56652 | 0.19782 | 0.5000 | 0.8000 | 2i    |
| 8   | CA1  | Ca      | 0.31800 | 0.43190 | 0.39810 | 0.5000 | 0.3200 | 2i    |
| 9   | SI5  | Si      | 0.59749 | 0.23410 | 0.55568 | 0.5000 | 1.0000 | 2i    |
| 10  | SI6  | Si      | 0.50607 | 0.05374 | 0.30074 | 0.5000 | 0.2000 | 2i    |
| 11  | CA2  | Ca      | 0.22220 | 0.07440 | 0.02040 | 0.5000 | 0.4200 | 2i    |
| 12  | NA2  | Na      | 0.18690 | 0.07130 | 0.08310 | 0.5000 | 0.1200 | 2i    |
| 13  | CA3  | Ca      | 0.18690 | 0.07130 | 0.08310 | 0.5000 | 0.2500 | 2i    |
| 14  | NA3  | Na      | 0.27221 | 0.42019 | 0.48627 | 0.5000 | 0.1600 | 2i    |
| 15  | CA4  | Ca      | 0.27221 | 0.42019 | 0.48627 | 0.5000 | 0.3100 | 2i    |
| 16  | NA4  | Na      | 0.31800 | 0.43190 | 0.39810 | 0.5000 | 0.1700 | 2i    |
| 17  | AL3  | Al      | 0.10590 | 0.72535 | 0.05485 | 0.5000 | 1.0000 | 2i    |
| 18  | O1   | O       | 0.18470 | 0.48010 | 0.77230 | 0.5000 | 1.0000 | 2i    |
| 19  | O2   | O       | 0.52270 | 0.41450 | 0.14990 | 0.5000 | 1.0000 | 2i    |
| 20  | O3   | O       | 0.00940 | 0.29730 | 0.08690 | 0.5000 | 1.0000 | 2i    |
| 21  | O4   | O       | 0.49600 | 0.20280 | 0.41820 | 0.5000 | 1.0000 | 2i    |
| 22  | O5   | O       | 0.09140 | 0.20650 | 0.58750 | 0.5000 | 1.0000 | 2i    |
| 23  | O6   | O       | 0.59730 | 0.70870 | 0.07390 | 0.5000 | 1.0000 | 2i    |
| 24  | O7   | O       | 0.13080 | 0.56010 | 0.14850 | 0.5000 | 1.0000 | 2i    |
| 25  | SI7  | Si      | 0.00188 | 0.43878 | 0.20044 | 0.5000 | 1.0000 | 2i    |
| 26  | O8   | O       | 0.29810 | 0.02860 | 0.73680 | 0.5000 | 1.0000 | 2i    |
| 27  | AL4  | Al      | 0.50607 | 0.05374 | 0.30074 | 0.5000 | 0.8000 | 2i    |
| 28  | O9   | O       | 0.28980 | 0.80180 | 0.00840 | 0.5000 | 1.0000 | 2i    |
| 29  | O10  | O       | 0.22620 | 0.69590 | 0.48970 | 0.5000 | 1.0000 | 2i    |
| 30  | O11  | O       | 0.43919 | 0.12990 | 0.14644 | 0.5000 | 1.0000 | 2i    |
| 31  | O12  | O       | 0.05983 | 0.36938 | 0.35134 | 0.5000 | 1.0000 | 2i    |
| 32  | O13  | O       | 0.00940 | 0.11660 | 0.86080 | 0.5000 | 1.0000 | 2i    |
| 33  | O14  | O       | 0.51610 | 0.61940 | 0.36260 | 0.5000 | 1.0000 | 2i    |
| 34  | O15  | O       | 0.97310 | 0.07660 | 0.34940 | 0.5000 | 1.0000 | 2i    |
| 35  | O16  | O       | 0.62430 | 0.07860 | 0.64680 | 0.5000 | 1.0000 | 2i    |

## Anisotropic Displacement Parameters [ $10^4 \text{ pm}^2$ ]

| Atom Name | B11 | B22 | B33 | B12 | B13 | B23 |
|-----------|-----|-----|-----|-----|-----|-----|
|-----------|-----|-----|-----|-----|-----|-----|

|     |           |           |           |           |            |            |
|-----|-----------|-----------|-----------|-----------|------------|------------|
| NA1 | 0.7040(3) | 1.602(6)  | 1.001(6)  | 0.373(3)  | 0.165(3)   | -0.399(4)  |
| SI1 | 0.8095(2) | 0.745(2)  | 0.962(2)  | 0.000(2)  | 0.303(2)   | -0.046(1)  |
| SI2 | 0.5770(2) | 0.600(2)  | 0.696(2)  | 0.026(2)  | 0.187(2)   | 0.059(1)   |
| AL1 | 0.5770(2) | 0.600(2)  | 0.696(2)  | 0.026(2)  | 0.187(2)   | 0.059(1)   |
| SI3 | 0.9106(2) | 1.022(2)  | 0.605(2)  | 0.301(2)  | 0.333(2)   | 0.085(1)   |
| SI4 | 0.7320(3) | 0.877(2)  | 0.429(2)  | 0.226(4)  | 0.224(7)   | -0.007(2)  |
| AL2 | 0.7320(3) | 0.877(2)  | 0.429(2)  | 0.226(4)  | 0.224(7)   | -0.007(2)  |
| CA1 | 1.0678(5) | 4.858(1)  | 2.1385(8) | 0.0000(5) | 0.7743(5)  | -2.0685(9) |
| SI5 | 0.8697(2) | 1.022(2)  | 0.689(2)  | 0.000(2)  | 0.344(2)   | -0.013(2)  |
| SI6 | 0.5920(2) | 0.633(2)  | 0.683(2)  | 0.026(2)  | 0.239(2)   | 0.065(2)   |
| CA2 | 0.7040(3) | 1.602(6)  | 1.001(6)  | 0.373(3)  | 0.165(3)   | -0.399(4)  |
| NA2 | 0.969(6)  | 0.73(3)   | 2.34(2)   | 0.00(1)   | 0.673(7)   | -2.62(2)   |
| CA3 | 0.969(6)  | 0.73(3)   | 2.34(2)   | 0.00(1)   | 0.673(7)   | -2.62(2)   |
| NA3 | 0.7815(5) | 1.7996(7) | 1.2480(7) | 0.3202(4) | 0.2020(4)  | -0.452(5)  |
| CA4 | 0.7815(5) | 1.7996(7) | 1.2480(7) | 0.3202(4) | 0.2020(4)  | -0.452(5)  |
| NA4 | 1.0678(5) | 4.858(1)  | 2.1385(8) | 0.0000(5) | 0.7743(5)  | -2.0685(9) |
| AL3 | 0.7556(2) | 0.811(2)  | 0.566(2)  | 0.000(2)  | 0.284(2)   | 0.072(2)   |
| O1  | 1.92(2)   | 1.7930(7) | 3.2761(8) | 0.1168(5) | 1.6908(7)  | -0.262(7)  |
| O2  | 1.572(6)  | 1.628(6)  | 1.476(6)  | 0.1092(5) | -0.1721(5) | -0.353(5)  |
| O3  | 1.442(6)  | 1.444(6)  | 1.131(6)  | 0.0979(5) | 0.0337(5)  | 0.124(5)   |
| O4  | 1.464(6)  | 1.470(5)  | 1.086(5)  | 0.1507(5) | 0.0561(5)  | 0.177(5)   |
| O5  | 1.593(6)  | 1.470(5)  | 1.268(6)  | 0.4671(5) | 0.3142(5)  | -0.046(4)  |
| O6  | 1.163(6)  | 1.542(6)  | 1.242(6)  | 0.3918(5) | 0.2432(5)  | -0.1636(9) |
| O7  | 1.313(6)  | 1.325(5)  | 1.606(6)  | 0.0000(5) | 0.5574(5)  | -0.026(5)  |
| SI7 | 0.7858(2) | 0.745(2)  | 0.930(2)  | 0.094(2)  | 0.303(2)   | 0.157(1)   |
| O8  | 1.507(6)  | 1.9644(7) | 2.9965(8) | 0.264(4)  | 1.347(7)   | -0.262(7)  |
| AL4 | 0.5920(2) | 0.633(2)  | 0.683(2)  | 0.026(2)  | 0.239(2)   | 0.065(2)   |
| O9  | 1.636(6)  | 1.305(5)  | 2.1645(7) | 0.0000(5) | 1.1971(6)  | -0.157(5)  |
| O10 | 1.442(6)  | 1.365(6)  | 2.0345(7) | 0.0000(5) | 0.9651(6)  | -0.144(5)  |
| O11 | 1.055(6)  | 0.995(5)  | 1.242(6)  | 0.0000(4) | 0.3292(5)  | 0.065(7)   |
| O12 | 1.012(6)  | 0.949(5)  | 1.099(6)  | 0.1733(4) | 0.3142(5)  | 0.308(4)   |
| O13 | 2.433(9)  | 1.938(6)  | 0.962(6)  | 0.4520(5) | 1.0624(6)  | 0.432(5)   |
| O14 | 2.174(6)  | 1.846(7)  | 0.956(6)  | 0.1243(5) | 0.8978(5)  | 0.111(5)   |
| O15 | 1.593(6)  | 2.0566(7) | 1.5925(7) | 0.2034(5) | -0.2207(6) | -0.308(5)  |
| O16 | 1.507(6)  | 1.523(6)  | 1.573(6)  | 0.0000(5) | 0.7669(5)  | 0.059(5)   |



---

**Stick Pattern**

Intensity [%]

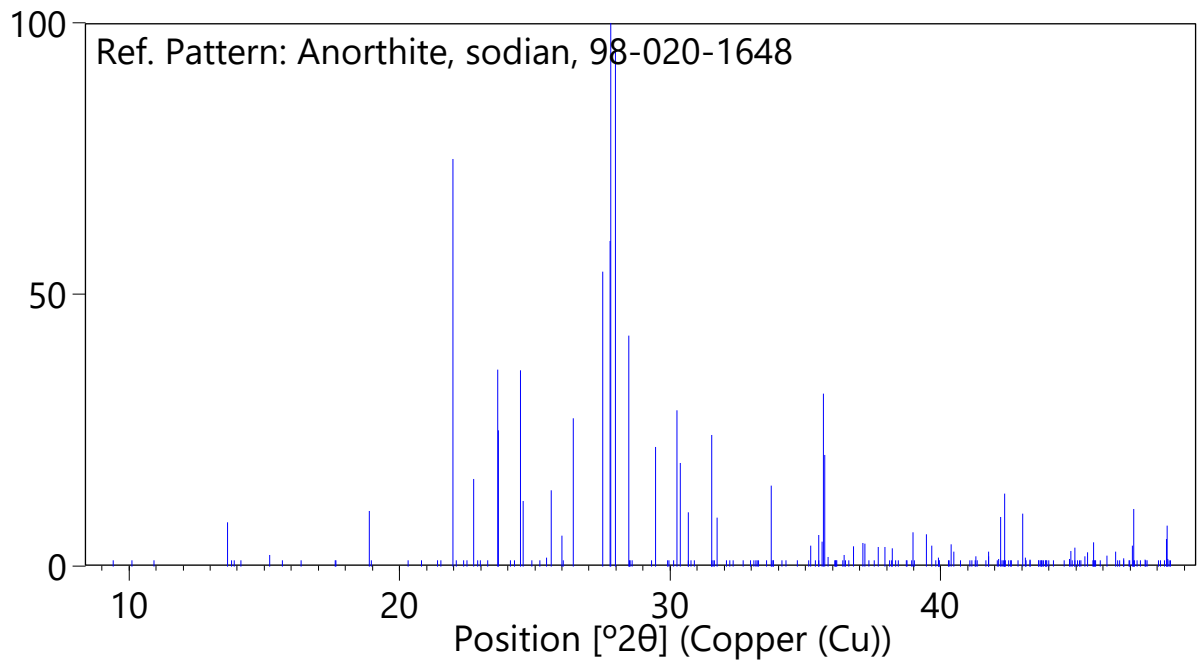

---

## Name and formula

Reference code: 98-015-2289

Mineral name: Birnessite  
Compound name: Birnessite  
Common name: Birnessite

Chemical formula:  $\text{H}_{0.8}\text{K}_{0.296}\text{Mn}_{0.926}\text{O}_{2.4}$

## Crystallographic parameters

Crystal system: Hexagonal  
Space group: R -3 m  
Space group number: 166

a (Å): 2.8450  
b (Å): 2.8450  
c (Å): 21.1200  
Alpha (°): 90.0000  
Beta (°): 90.0000  
Gamma (°): 120.0000

Calculated density (g/cm<sup>3</sup>): 3.42  
Volume of cell (10<sup>6</sup> pm<sup>3</sup>): 148.04  
Z: 3.00

RIR: 10.54

## Subfiles and quality

Subfiles: User Inorganic, User Mineral  
Quality: User From Structure (=)

## Comments

Creation Date: 01-10-2006  
Modification Date: 01-02-2008  
Cross-References: ICSD:152289, PANICSD:98-015-2289

---

Original ICSD space group: R-3MH. Coordinates are given in an orthorhombic cell with cell constants  $a' = a\sqrt{3}, b' = b, c' = c$ ; the transformation to R3-mh coordinates is given by  $x = 2x', y = x' + y'$ , where  $x', y'$  are the coordinates given in Tab.3 in the orthorhombic cell. X-ray diffraction (powder)

Structure type:  $K_xMn_{1-y}O_2(H_2O)_z$ . Temperature factors available

Temperature in Kelvin: 373. Standard deviation missing in cell constants. Rietveld profile refinement applied. Polytype structure 3R-

Compound with mineral name: Birnessite

Structure type:  $K_xMn_{1-y}O_2(H_2O)_z$

Recording date: 10/01/06

Modification date: 02/01/08

Mineral origin: synthetic

ANX formula: AB3X7

Z: 3

Calculated density: 3.42

R value: 0.1224

Pearson code: hR4

Wyckoff code: h2 c a

Publication title: Structure of birnessite obtained from decomposition of permanganate under soft hydrothermal conditions. I. Chemical and structural evolution as a function of temperature

ICSD collection code: 152289

Structure:  $K_xMn_{1-y}O_2(H_2O)_z$

Chemical Name: Potassium Manganese Oxide Hydrate (0.3/0.93/2/0.4)

Second Chemical Formula:  $K_{0.296}Mn_{0.926}O_2(H_2O)_{0.40}$

## References

Structure: Drits, V.A.;Lanson, B.;Gaillot, A.C., *Chemistry of Materials*, **17**, 2959 - 2975, (2005)

---

**Peak list**

| No. | h | k | l  | d [Å]   | 2 $\theta$ [°] | I [%] |
|-----|---|---|----|---------|----------------|-------|
| 1   | 0 | 0 | 3  | 7.04000 | 12.563         | 100.0 |
| 2   | 0 | 0 | 6  | 3.52000 | 25.281         | 15.0  |
| 3   | 1 | 0 | 1  | 2.44725 | 36.693         | 8.6   |
| 4   | 0 | 1 | 2  | 2.39940 | 37.451         | 1.1   |
| 5   | 0 | 0 | 9  | 2.34667 | 38.325         | 0.3   |
| 6   | 1 | 0 | 4  | 2.23272 | 40.364         | 13.8  |
| 7   | 0 | 1 | 5  | 2.12825 | 42.439         | 1.5   |
| 8   | 1 | 0 | 7  | 1.90837 | 47.612         | 13.1  |
| 9   | 0 | 1 | 8  | 1.80126 | 50.636         | 2.2   |
| 10  | 0 | 0 | 12 | 1.76000 | 51.911         | 0.6   |
| 11  | 1 | 0 | 10 | 1.60351 | 57.421         | 4.3   |
| 12  | 0 | 1 | 11 | 1.51446 | 61.145         | 3.6   |
| 13  | 1 | 1 | 0  | 1.42250 | 65.573         | 3.7   |
| 14  | 0 | 0 | 15 | 1.40800 | 66.335         | 0.2   |
| 15  | 1 | 1 | 3  | 1.39432 | 67.071         | 4.7   |
| 16  | 1 | 0 | 13 | 1.35630 | 69.213         | 1.3   |
| 17  | 1 | 1 | 6  | 1.31888 | 71.473         | 2.0   |
| 18  | 0 | 1 | 14 | 1.28656 | 73.557         | 2.0   |
| 19  | 0 | 2 | 1  | 1.22983 | 77.562         | 0.9   |
| 20  | 2 | 0 | 2  | 1.22362 | 78.030         | 0.3   |
| 21  | 1 | 1 | 9  | 1.21645 | 78.578         | 0.5   |
| 22  | 0 | 2 | 4  | 1.19970 | 79.894         | 1.3   |
| 23  | 2 | 0 | 5  | 1.18265 | 81.284         | 0.4   |
| 24  | 0 | 0 | 18 | 1.17333 | 82.068         | 0.5   |
| 25  | 1 | 0 | 16 | 1.16354 | 82.910         | 0.2   |
| 26  | 0 | 2 | 7  | 1.14051 | 84.970         | 1.6   |
| 27  | 2 | 0 | 8  | 1.11636 | 87.262         | 0.5   |
| 28  | 0 | 1 | 17 | 1.10931 | 87.958         | 1.1   |
| 29  | 1 | 1 | 12 | 1.10633 | 88.257         | 0.5   |

---

## Structure

| No. | Name | Element | X       | Y       | Z       | Biso   | sof    | Wyck. |
|-----|------|---------|---------|---------|---------|--------|--------|-------|
| 1   | O1   | O       | 0.55000 | 0.45000 | 0.01670 | 2.0000 | 0.0670 | 18h   |
| 2   | K1   | K       | 0.57333 | 0.42667 | 0.16667 | 2.0000 | 0.0493 | 18h   |
| 3   | O2   | O       | 0.00000 | 0.00000 | 0.28603 | 1.0000 | 1.0000 | 6c    |
| 4   | MN1  | Mn      | 0.00000 | 0.00000 | 0.00000 | 0.5000 | 0.9250 | 3a    |

---

## Stick Pattern

Intensity [%]

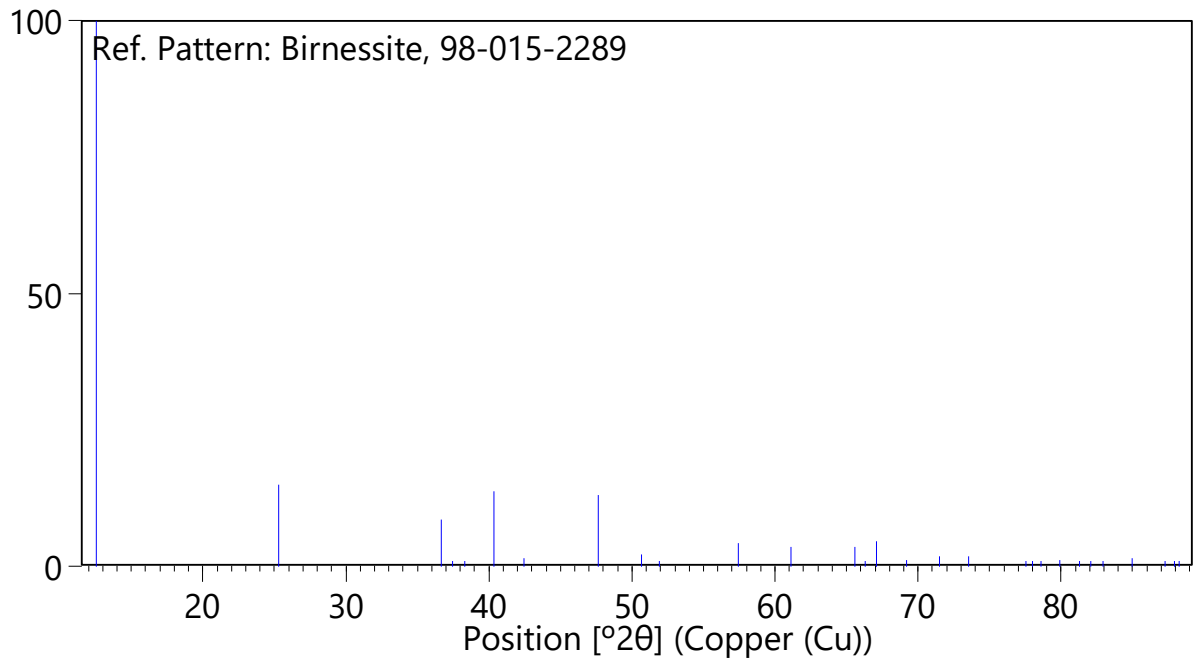

---

## Name and formula

|                   |                                                                 |
|-------------------|-----------------------------------------------------------------|
| Reference code:   | 98-018-7569                                                     |
| Mineral name:     | Muscovite 2M1                                                   |
| Compound name:    | Muscovite 2M1                                                   |
| Common name:      | Muscovite 2M1                                                   |
| Chemical formula: | $\text{H}_8\text{Al}_{12}\text{K}_4\text{O}_{48}\text{Si}_{12}$ |

## Crystallographic parameters

|                                                    |          |
|----------------------------------------------------|----------|
| Crystal system:                                    | Anorthic |
| Space group:                                       | P 1      |
| Space group number:                                | 1        |
| a (Å):                                             | 5.1870   |
| b (Å):                                             | 9.0070   |
| c (Å):                                             | 20.1480  |
| Alpha (°):                                         | 90.0000  |
| Beta (°):                                          | 95.4370  |
| Gamma (°):                                         | 90.0000  |
| Calculated density (g/cm <sup>3</sup> ):           | 2.82     |
| Volume of cell (10 <sup>6</sup> pm <sup>3</sup> ): | 937.07   |
| Z:                                                 | 1.00     |
| RIR:                                               | 0.32     |

## Subfiles and quality

|           |                              |
|-----------|------------------------------|
| Subfiles: | User Inorganic, User Mineral |
| Quality:  | User From Structure (=)      |

## Comments

|                            |                                                                      |
|----------------------------|----------------------------------------------------------------------|
| Creation Date:             | 01-08-2013                                                           |
| Cross-References:          | ICSD:187569, PANICSD:98-018-7569                                     |
| Original ICSD space group: | P1. DFT calculation using optimized PP and PBE-GGA with SIESTA code. |

---

At least one temperature factor missing in the paper.. No R value given in the paper.

Structure type: Mica.(2M1)-P1. Structure calculated theoretically

Structure type prototype: Mica.(2M1)-P1. Standard deviation missing in cell constants

Compound with mineral name: Muscovite 2M1

Structure type: Mica.(2M1)-P1

Recording date: 08/01/13

ANX formula: AB3C3X12

Z: 1

Calculated density: 2.82

Pearson code: aP84

Wyckoff code: a76

Structure TIDY: TRANS -x,-y,-z origin .72972 .39286 .32871

Publication title: Computational study of the elastic behavior of the 2M1 muscovite-paragonite series

ICSD collection code: 187569

Structure: Mica.(2M1)-P1

Chemical Name: Potassium Aluminosilicate Hydroxide (4/12/8)

Second Chemical Formula: K4 (Al12 Si12 O40 (O H)8)

## References

Structure: Hernandez-Laguna, A.;Sainz-Diaz, C.I.;Munoz-Santiburcio, D.;Perez Del Valle, C.;Ortega-Castro, J.;Hernandez-Haro, N., *American Mineralogist*, **98**, 651 - 664, (2013)



---

**Peak list**

| No. | h | k  | l  | d [Å]    | 2 $\theta$ [°] | I [%] |
|-----|---|----|----|----------|----------------|-------|
| 1   | 0 | 0  | 1  | 20.05735 | 4.402          | 0.0   |
| 2   | 0 | 0  | 2  | 10.02868 | 8.810          | 100.0 |
| 3   | 0 | 1  | 0  | 9.00700  | 9.812          | 0.1   |
| 4   | 0 | 1  | 1  | 8.21656  | 10.759         | 1.2   |
| 5   | 0 | 1  | -2 | 6.70110  | 13.202         | 0.0   |
| 6   | 0 | 0  | 3  | 6.68579  | 13.232         | 0.0   |
| 7   | 0 | 1  | 3  | 5.36844  | 16.499         | 0.4   |
| 8   | 1 | 0  | 0  | 5.16366  | 17.158         | 0.5   |
| 9   | 1 | 0  | -1 | 5.11909  | 17.309         | 0.0   |
| 10  | 0 | 0  | 4  | 5.01434  | 17.673         | 33.3  |
| 11  | 1 | 0  | 1  | 4.88999  | 18.127         | 0.0   |
| 12  | 1 | 0  | -2 | 4.77884  | 18.552         | 0.1   |
| 13  | 0 | 2  | 0  | 4.50350  | 19.697         | 9.2   |
| 14  | 1 | 1  | 0  | 4.47971  | 19.803         | 21.6  |
| 15  | 1 | -1 | -1 | 4.45051  | 19.934         | 42.1  |
| 16  | 1 | 0  | 2  | 4.42344  | 20.057         | 0.0   |
| 17  | 0 | 2  | -1 | 4.39410  | 20.193         | 4.7   |
| 18  | 0 | 1  | 4  | 4.38116  | 20.253         | 0.0   |
| 19  | 1 | 1  | 1  | 4.29749  | 20.651         | 17.2  |
| 20  | 1 | 0  | -3 | 4.28798  | 20.698         | 0.0   |
| 21  | 1 | -1 | -2 | 4.22146  | 21.028         | 0.1   |
| 22  | 0 | 2  | -2 | 4.10828  | 21.614         | 10.2  |
| 23  | 0 | 0  | 5  | 4.01147  | 22.142         | 0.0   |
| 24  | 1 | -1 | 2  | 3.97046  | 22.373         | 4.4   |
| 25  | 1 | 0  | 3  | 3.91135  | 22.716         | 0.0   |
| 26  | 1 | -1 | -3 | 3.87163  | 22.952         | 40.0  |
| 27  | 1 | 0  | -4 | 3.78080  | 23.511         | 0.3   |
| 28  | 0 | 2  | -3 | 3.73515  | 23.803         | 39.0  |
| 29  | 0 | 1  | 5  | 3.66447  | 24.269         | 0.1   |
| 30  | 1 | 1  | 3  | 3.58767  | 24.797         | 1.8   |
| 31  | 1 | -1 | -4 | 3.48612  | 25.531         | 57.5  |
| 32  | 1 | 0  | 4  | 3.43817  | 25.893         | 0.5   |
| 33  | 1 | -2 | 0  | 3.39402  | 26.236         | 0.1   |
| 34  | 1 | -2 | -1 | 3.38126  | 26.337         | 0.1   |
| 35  | 0 | 2  | -4 | 3.35055  | 26.583         | 32.5  |
| 36  | 0 | 0  | 6  | 3.34289  | 26.645         | 87.8  |
| 37  | 1 | 0  | -5 | 3.32413  | 26.798         | 0.0   |
| 38  | 1 | -2 | 1  | 3.31268  | 26.892         | 0.0   |

|    |   |    |    |         |        |      |
|----|---|----|----|---------|--------|------|
| 39 | 1 | -2 | -2 | 3.27747 | 27.187 | 0.9  |
| 40 | 1 | 1  | 4  | 3.21211 | 27.751 | 55.9 |
| 41 | 1 | 2  | 2  | 3.15577 | 28.256 | 0.4  |
| 42 | 0 | 1  | 6  | 3.13400 | 28.457 | 0.1  |
| 43 | 1 | 1  | -5 | 3.11853 | 28.601 | 3.4  |
| 44 | 1 | -2 | -3 | 3.10546 | 28.724 | 0.1  |
| 45 | 1 | 0  | 5  | 3.03175 | 29.438 | 0.0  |
| 46 | 0 | 3  | 0  | 3.00233 | 29.733 | 0.0  |
| 47 | 0 | 2  | -5 | 2.99545 | 29.803 | 60.4 |
| 48 | 0 | 3  | -1 | 2.96925 | 30.072 | 0.2  |
| 49 | 1 | 2  | 3  | 2.95306 | 30.241 | 0.2  |
| 50 | 1 | 0  | -6 | 2.93595 | 30.421 | 0.1  |
| 51 | 1 | -2 | -4 | 2.89565 | 30.855 | 0.0  |
| 52 | 0 | 3  | 2  | 2.87621 | 31.069 | 0.0  |
| 53 | 1 | -1 | 5  | 2.87334 | 31.101 | 36.1 |
| 54 | 0 | 0  | 7  | 2.86534 | 31.190 | 0.0  |
| 55 | 1 | -1 | -6 | 2.79139 | 32.038 | 29.2 |
| 56 | 0 | 3  | 3  | 2.73885 | 32.670 | 0.0  |
| 57 | 1 | -2 | 4  | 2.73280 | 32.744 | 0.7  |
| 58 | 0 | 1  | -7 | 2.73050 | 32.772 | 0.0  |
| 59 | 1 | 0  | 6  | 2.69221 | 33.252 | 0.3  |
| 60 | 0 | 2  | -6 | 2.68422 | 33.354 | 0.2  |
| 61 | 1 | -2 | -5 | 2.67448 | 33.479 | 0.0  |
| 62 | 1 | 0  | -7 | 2.61268 | 34.295 | 0.0  |
| 63 | 1 | 3  | 0  | 2.59549 | 34.529 | 3.9  |
| 64 | 2 | 0  | -1 | 2.59199 | 34.577 | 0.0  |
| 65 | 1 | 3  | -1 | 2.58978 | 34.608 | 22.6 |
| 66 | 2 | 0  | 0  | 2.58183 | 34.717 | 31.8 |
| 67 | 1 | 1  | 6  | 2.57945 | 34.751 | 10.3 |
| 68 | 0 | 3  | 4  | 2.57590 | 34.800 | 0.0  |
| 69 | 2 | 0  | -2 | 2.55954 | 35.030 | 77.0 |
| 70 | 1 | -3 | 1  | 2.55857 | 35.043 | 69.3 |
| 71 | 1 | 3  | -2 | 2.54225 | 35.276 | 0.2  |
| 72 | 2 | 0  | 1  | 2.53052 | 35.445 | 0.0  |
| 73 | 1 | 2  | 5  | 2.51496 | 35.671 | 0.0  |
| 74 | 1 | 1  | -7 | 2.50924 | 35.755 | 6.0  |
| 75 | 0 | 0  | 8  | 2.50717 | 35.786 | 9.7  |
| 76 | 2 | 1  | -1 | 2.49090 | 36.027 | 0.0  |
| 77 | 2 | 0  | -3 | 2.48905 | 36.055 | 0.0  |
| 78 | 1 | 3  | 2  | 2.48417 | 36.128 | 0.5  |

|     |   |    |    |         |        |      |
|-----|---|----|----|---------|--------|------|
| 79  | 2 | -1 | 0  | 2.48188 | 36.163 | 0.0  |
| 80  | 2 | 1  | -2 | 2.46206 | 36.464 | 0.0  |
| 81  | 1 | -3 | -3 | 2.45941 | 36.505 | 24.1 |
| 82  | 2 | 0  | 2  | 2.44499 | 36.728 | 20.4 |
| 83  | 2 | -1 | 1  | 2.43620 | 36.865 | 0.1  |
| 84  | 0 | 2  | 7  | 2.41750 | 37.161 | 3.0  |
| 85  | 0 | 1  | 8  | 2.41534 | 37.195 | 0.0  |
| 86  | 1 | 0  | 7  | 2.41042 | 37.274 | 0.0  |
| 87  | 0 | 3  | 5  | 2.40367 | 37.382 | 0.0  |
| 88  | 2 | -1 | -3 | 2.39912 | 37.456 | 0.1  |
| 89  | 2 | 0  | -4 | 2.38942 | 37.614 | 16.3 |
| 90  | 1 | -3 | 3  | 2.38160 | 37.742 | 18.1 |
| 91  | 2 | -1 | 2  | 2.35960 | 38.107 | 0.0  |
| 92  | 1 | 3  | -4 | 2.35118 | 38.249 | 0.3  |
| 93  | 1 | 0  | -8 | 2.34434 | 38.365 | 0.1  |
| 94  | 2 | 0  | 3  | 2.33528 | 38.520 | 0.0  |
| 95  | 1 | -1 | 7  | 2.32848 | 38.637 | 0.2  |
| 96  | 1 | -2 | 6  | 2.31079 | 38.944 | 0.0  |
| 97  | 2 | 1  | -4 | 2.30953 | 38.966 | 0.0  |
| 98  | 2 | 0  | -5 | 2.27118 | 39.652 | 0.0  |
| 99  | 1 | 1  | -8 | 2.26875 | 39.696 | 0.4  |
| 100 | 1 | -3 | 4  | 2.26146 | 39.829 | 0.0  |
| 101 | 2 | 1  | 3  | 2.26053 | 39.846 | 0.0  |
| 102 | 1 | 2  | -7 | 2.25991 | 39.858 | 0.0  |
| 103 | 0 | 4  | 0  | 2.25175 | 40.008 | 1.2  |
| 104 | 2 | 2  | -1 | 2.24648 | 40.106 | 6.1  |
| 105 | 2 | -2 | 0  | 2.23986 | 40.230 | 2.2  |
| 106 | 0 | 4  | -1 | 2.23769 | 40.271 | 2.0  |
| 107 | 0 | 3  | 6  | 2.23370 | 40.346 | 0.1  |
| 108 | 0 | 0  | 9  | 2.22860 | 40.442 | 0.0  |
| 109 | 1 | 3  | -5 | 2.22808 | 40.452 | 4.9  |
| 110 | 2 | -2 | -2 | 2.22526 | 40.505 | 0.1  |
| 111 | 2 | 0  | 4  | 2.21172 | 40.764 | 5.5  |
| 112 | 2 | 2  | 1  | 2.20611 | 40.873 | 6.1  |
| 113 | 2 | 1  | -5 | 2.20224 | 40.948 | 0.0  |
| 114 | 0 | 4  | 2  | 2.19705 | 41.049 | 4.8  |
| 115 | 0 | 2  | -8 | 2.19058 | 41.175 | 0.0  |
| 116 | 2 | 2  | -3 | 2.17846 | 41.415 | 8.0  |
| 117 | 1 | 0  | 8  | 2.17582 | 41.468 | 0.0  |
| 118 | 0 | 1  | 9  | 2.16336 | 41.718 | 0.0  |

|     |   |    |    |         |        |      |
|-----|---|----|----|---------|--------|------|
| 119 | 2 | -2 | 2  | 2.14874 | 42.015 | 2.4  |
| 120 | 2 | -1 | 4  | 2.14791 | 42.032 | 0.1  |
| 121 | 2 | 0  | -6 | 2.14399 | 42.112 | 34.3 |
| 122 | 0 | 4  | -3 | 2.13397 | 42.320 | 3.5  |
| 123 | 1 | -3 | 5  | 2.13329 | 42.334 | 32.9 |
| 124 | 1 | -2 | 7  | 2.12516 | 42.503 | 0.0  |
| 125 | 1 | 0  | -9 | 2.12056 | 42.600 | 0.0  |
| 126 | 1 | -1 | 8  | 2.11499 | 42.718 | 0.0  |
| 127 | 2 | -2 | -4 | 2.11073 | 42.808 | 0.0  |
| 128 | 1 | 3  | -6 | 2.09911 | 43.057 | 0.6  |
| 129 | 2 | -1 | -6 | 2.08571 | 43.348 | 0.0  |
| 130 | 2 | 0  | 5  | 2.08307 | 43.405 | 0.0  |
| 131 | 1 | -2 | -8 | 2.07946 | 43.485 | 0.0  |
| 132 | 2 | -2 | 3  | 2.07313 | 43.624 | 6.0  |
| 133 | 0 | 3  | -7 | 2.07284 | 43.631 | 0.0  |
| 134 | 1 | -1 | -9 | 2.06413 | 43.824 | 0.5  |
| 135 | 1 | -4 | -1 | 2.06116 | 43.891 | 0.1  |
| 136 | 0 | 4  | 4  | 2.05414 | 44.048 | 9.3  |
| 137 | 1 | -4 | 1  | 2.04532 | 44.248 | 0.1  |
| 138 | 1 | -4 | -2 | 2.03695 | 44.440 | 0.0  |
| 139 | 2 | 1  | 5  | 2.02950 | 44.612 | 0.7  |
| 140 | 2 | 2  | -5 | 2.02789 | 44.649 | 3.2  |
| 141 | 2 | 0  | -7 | 2.01536 | 44.942 | 0.0  |
| 142 | 1 | 4  | 2  | 2.00671 | 45.146 | 0.1  |
| 143 | 0 | 0  | 10 | 2.00574 | 45.169 | 51.4 |
| 144 | 1 | 3  | 6  | 2.00438 | 45.201 | 0.1  |
| 145 | 0 | 2  | -9 | 1.99741 | 45.368 | 0.4  |
| 146 | 1 | 4  | -3 | 1.99359 | 45.460 | 0.2  |
| 147 | 2 | 2  | 4  | 1.98523 | 45.662 | 0.6  |
| 148 | 1 | 0  | 9  | 1.97907 | 45.812 | 0.0  |
| 149 | 1 | -3 | -7 | 1.97091 | 46.013 | 18.7 |
| 150 | 2 | 1  | -7 | 1.96673 | 46.116 | 0.0  |
| 151 | 0 | 4  | 5  | 1.96355 | 46.195 | 0.4  |
| 152 | 2 | -3 | -1 | 1.96198 | 46.234 | 0.0  |
| 153 | 1 | -2 | 8  | 1.95915 | 46.305 | 0.0  |
| 154 | 0 | 1  | 10 | 1.95778 | 46.339 | 0.0  |
| 155 | 2 | 3  | 0  | 1.95756 | 46.345 | 0.2  |
| 156 | 2 | 0  | 6  | 1.95567 | 46.392 | 15.2 |
| 157 | 1 | -4 | 3  | 1.95147 | 46.498 | 0.1  |
| 158 | 2 | 3  | -2 | 1.94779 | 46.591 | 0.4  |

|     |   |    |     |         |        |     |
|-----|---|----|-----|---------|--------|-----|
| 159 | 2 | -2 | -6  | 1.93581 | 46.896 | 2.1 |
| 160 | 2 | -3 | 1   | 1.93491 | 46.920 | 0.0 |
| 161 | 1 | 4  | -4  | 1.93463 | 46.927 | 0.0 |
| 162 | 1 | 1  | 9   | 1.93296 | 46.970 | 0.2 |
| 163 | 1 | 0  | -10 | 1.93246 | 46.983 | 0.0 |
| 164 | 0 | 3  | -8  | 1.92441 | 47.191 | 0.0 |
| 165 | 1 | 2  | -9  | 1.91852 | 47.345 | 0.0 |
| 166 | 2 | -3 | -3  | 1.91618 | 47.406 | 0.0 |
| 167 | 2 | -1 | 6   | 1.91114 | 47.539 | 0.0 |
| 168 | 2 | -3 | 2   | 1.89586 | 47.946 | 0.0 |
| 169 | 2 | -2 | 5   | 1.89062 | 48.087 | 0.2 |
| 170 | 2 | 0  | -8  | 1.89040 | 48.093 | 2.8 |
| 171 | 1 | -1 | -10 | 1.88946 | 48.119 | 0.3 |
| 172 | 1 | 4  | 4   | 1.88371 | 48.275 | 0.0 |
| 173 | 1 | 3  | 7   | 1.87961 | 48.387 | 1.6 |
| 174 | 2 | -3 | -4  | 1.86960 | 48.663 | 0.0 |
| 175 | 0 | 4  | 6   | 1.86758 | 48.719 | 1.1 |
| 176 | 1 | 4  | -5  | 1.86429 | 48.810 | 0.0 |
| 177 | 2 | -1 | -8  | 1.85009 | 49.210 | 0.0 |
| 178 | 1 | 3  | -8  | 1.84776 | 49.276 | 1.6 |
| 179 | 2 | -3 | 3   | 1.84332 | 49.403 | 0.0 |
| 180 | 2 | 2  | -7  | 1.83956 | 49.510 | 0.1 |
| 181 | 2 | 0  | 7   | 1.83360 | 49.682 | 0.0 |
| 182 | 0 | 2  | -10 | 1.83223 | 49.722 | 0.8 |
| 183 | 0 | 0  | 11  | 1.82340 | 49.979 | 0.0 |
| 184 | 1 | 0  | 10  | 1.81258 | 50.298 | 0.1 |
| 185 | 1 | 2  | 9   | 1.81184 | 50.320 | 0.0 |
| 186 | 2 | -3 | -5  | 1.81130 | 50.336 | 0.0 |
| 187 | 1 | -4 | 5   | 1.80769 | 50.443 | 0.0 |
| 188 | 0 | 5  | 0   | 1.80140 | 50.632 | 0.0 |
| 189 | 2 | 1  | 7   | 1.79675 | 50.773 | 0.0 |
| 190 | 0 | 5  | 1   | 1.79418 | 50.850 | 0.2 |
| 191 | 2 | -2 | 6   | 1.79384 | 50.861 | 0.4 |
| 192 | 0 | 3  | 9   | 1.78948 | 50.994 | 0.0 |
| 193 | 0 | 1  | 11  | 1.78714 | 51.065 | 0.0 |
| 194 | 1 | 4  | -6  | 1.78675 | 51.077 | 0.0 |
| 195 | 2 | -3 | 4   | 1.78071 | 51.263 | 0.1 |
| 196 | 1 | -1 | 10  | 1.77695 | 51.379 | 0.0 |
| 197 | 1 | -2 | -10 | 1.77587 | 51.413 | 0.0 |
| 198 | 0 | 5  | 2   | 1.77302 | 51.501 | 0.0 |

---

|     |   |    |    |         |        |     |
|-----|---|----|----|---------|--------|-----|
| 199 | 2 | 0  | -9 | 1.77213 | 51.529 | 0.0 |
| 200 | 0 | 4  | -7 | 1.77047 | 51.581 | 0.7 |
| 201 | 1 | -3 | 8  | 1.76181 | 51.853 | 0.4 |
| 202 | 2 | -3 | -6 | 1.74478 | 52.398 | 0.1 |
| 203 | 2 | -2 | -8 | 1.74306 | 52.453 | 2.2 |

## Structure

| No. | Name | Element | X       | Y       | Z       | Biso   | sof    | Wyck. |
|-----|------|---------|---------|---------|---------|--------|--------|-------|
| 1   | AL1  | Al      | 0.02267 | 0.52175 | 0.67027 | 0.5000 | 1.0000 | 1a    |
| 2   | H1   | H       | 0.90934 | 0.94882 | 0.61833 | 0.5000 | 1.0000 | 1a    |
| 3   | SI1  | Si      | 0.73085 | 0.67642 | 0.30683 | 0.5000 | 1.0000 | 1a    |
| 4   | AL2  | Al      | 0.73430 | 0.34610 | 0.30761 | 0.5000 | 1.0000 | 1a    |
| 5   | O1   | O       | 0.73081 | 0.66718 | 0.22512 | 0.5000 | 1.0000 | 1a    |
| 6   | O2   | O       | 0.65405 | 0.35740 | 0.22072 | 0.5000 | 1.0000 | 1a    |
| 7   | O3   | O       | 0.72588 | 0.04185 | 0.22208 | 0.5000 | 1.0000 | 1a    |
| 8   | O4   | O       | 0.68129 | 0.52165 | 0.34346 | 0.5000 | 1.0000 | 1a    |
| 9   | O5   | O       | 0.52048 | 0.80114 | 0.33014 | 0.5000 | 1.0000 | 1a    |
| 10  | K1   | K       | 0.77027 | 0.00356 | 0.42129 | 0.5000 | 1.0000 | 1a    |
| 11  | H2   | H       | 0.63123 | 0.94883 | 0.22425 | 0.5000 | 1.0000 | 1a    |
| 12  | H3   | H       | 0.63125 | 0.26542 | 0.72425 | 0.5000 | 1.0000 | 1a    |
| 13  | SI2  | Si      | 0.80970 | 0.67641 | 0.53576 | 0.5000 | 1.0000 | 1a    |
| 14  | AL3  | Al      | 0.80627 | 0.34610 | 0.53498 | 0.5000 | 1.0000 | 1a    |
| 15  | O6   | O       | 0.80975 | 0.66717 | 0.61747 | 0.5000 | 1.0000 | 1a    |
| 16  | O7   | O       | 0.88651 | 0.35739 | 0.62186 | 0.5000 | 1.0000 | 1a    |
| 17  | O8   | O       | 0.81470 | 0.04184 | 0.62050 | 0.5000 | 1.0000 | 1a    |
| 18  | O9   | O       | 0.85926 | 0.52165 | 0.49913 | 0.5000 | 1.0000 | 1a    |
| 19  | O10  | O       | 0.02008 | 0.80113 | 0.51245 | 0.5000 | 1.0000 | 1a    |
| 20  | K2   | K       | 0.77029 | 0.21072 | 0.92129 | 0.5000 | 1.0000 | 1a    |
| 21  | O11  | O       | 0.01753 | 0.73954 | 0.33978 | 0.5000 | 1.0000 | 1a    |
| 22  | AL4  | Al      | 0.51790 | 0.69251 | 0.67232 | 0.5000 | 1.0000 | 1a    |
| 23  | AL5  | Al      | 0.02266 | 0.69252 | 0.17027 | 0.5000 | 1.0000 | 1a    |
| 24  | SI3  | Si      | 0.80971 | 0.53786 | 0.03575 | 0.5000 | 1.0000 | 1a    |
| 25  | AL6  | Al      | 0.80627 | 0.86818 | 0.03497 | 0.5000 | 1.0000 | 1a    |
| 26  | O12  | O       | 0.80975 | 0.54709 | 0.11746 | 0.5000 | 1.0000 | 1a    |
| 27  | O13  | O       | 0.88651 | 0.85688 | 0.12186 | 0.5000 | 1.0000 | 1a    |
| 28  | O14  | O       | 0.81468 | 0.17242 | 0.12050 | 0.5000 | 1.0000 | 1a    |
| 29  | O15  | O       | 0.85926 | 0.69262 | 0.99912 | 0.5000 | 1.0000 | 1a    |
| 30  | O16  | O       | 0.02008 | 0.41314 | 0.01244 | 0.5000 | 1.0000 | 1a    |
| 31  | AL7  | Al      | 0.51790 | 0.52176 | 0.17231 | 0.5000 | 1.0000 | 1a    |
| 32  | H4   | H       | 0.90933 | 0.26545 | 0.11833 | 0.5000 | 1.0000 | 1a    |
| 33  | K3   | K       | 0.27029 | 0.70594 | 0.92129 | 0.5000 | 1.0000 | 1a    |
| 34  | SI4  | Si      | 0.73085 | 0.53786 | 0.80683 | 0.5000 | 1.0000 | 1a    |
| 35  | AL8  | Al      | 0.73431 | 0.86817 | 0.80761 | 0.5000 | 1.0000 | 1a    |
| 36  | O17  | O       | 0.73081 | 0.54708 | 0.72512 | 0.5000 | 1.0000 | 1a    |
| 37  | O18  | O       | 0.65407 | 0.85687 | 0.72072 | 0.5000 | 1.0000 | 1a    |
| 38  | O19  | O       | 0.72590 | 0.17240 | 0.72208 | 0.5000 | 1.0000 | 1a    |

|    |      |    |         |         |         |        |        |    |
|----|------|----|---------|---------|---------|--------|--------|----|
| 39 | O20  | O  | 0.68130 | 0.69262 | 0.84346 | 0.5000 | 1.0000 | 1a |
| 40 | O21  | O  | 0.52048 | 0.41314 | 0.83014 | 0.5000 | 1.0000 | 1a |
| 41 | O22  | O  | 0.01753 | 0.47473 | 0.83978 | 0.5000 | 1.0000 | 1a |
| 42 | O23  | O  | 0.52303 | 0.47474 | 0.00280 | 0.5000 | 1.0000 | 1a |
| 43 | AL9  | Al | 0.52451 | 0.02365 | 0.67187 | 0.5000 | 1.0000 | 1a |
| 44 | O24  | O  | 0.52303 | 0.73954 | 0.50280 | 0.5000 | 1.0000 | 1a |
| 45 | SI5  | Si | 0.25272 | 0.17720 | 0.30776 | 0.5000 | 1.0000 | 1a |
| 46 | SI6  | Si | 0.22021 | 0.85093 | 0.30567 | 0.5000 | 1.0000 | 1a |
| 47 | O25  | O  | 0.23508 | 0.16007 | 0.22538 | 0.5000 | 1.0000 | 1a |
| 48 | O26  | O  | 0.17032 | 0.85642 | 0.22466 | 0.5000 | 1.0000 | 1a |
| 49 | O27  | O  | 0.22709 | 0.55053 | 0.22291 | 0.5000 | 1.0000 | 1a |
| 50 | O28  | O  | 0.17498 | 0.01357 | 0.33967 | 0.5000 | 1.0000 | 1a |
| 51 | O29  | O  | 0.06083 | 0.30673 | 0.32942 | 0.5000 | 1.0000 | 1a |
| 52 | K4   | K  | 0.27028 | 0.50833 | 0.42129 | 0.5000 | 1.0000 | 1a |
| 53 | H5   | H  | 0.14457 | 0.46089 | 0.23777 | 0.5000 | 1.0000 | 1a |
| 54 | H6   | H  | 0.14457 | 0.75338 | 0.73777 | 0.5000 | 1.0000 | 1a |
| 55 | SI7  | Si | 0.28785 | 0.17719 | 0.53482 | 0.5000 | 1.0000 | 1a |
| 56 | SI8  | Si | 0.32035 | 0.85093 | 0.53692 | 0.5000 | 1.0000 | 1a |
| 57 | O30  | O  | 0.30550 | 0.16007 | 0.61720 | 0.5000 | 1.0000 | 1a |
| 58 | O31  | O  | 0.37026 | 0.85642 | 0.61793 | 0.5000 | 1.0000 | 1a |
| 59 | O32  | O  | 0.31347 | 0.55052 | 0.61968 | 0.5000 | 1.0000 | 1a |
| 60 | O33  | O  | 0.36558 | 0.01356 | 0.50292 | 0.5000 | 1.0000 | 1a |
| 61 | O34  | O  | 0.47974 | 0.30673 | 0.51316 | 0.5000 | 1.0000 | 1a |
| 62 | O35  | O  | 0.00001 | 0.21428 | 0.50000 | 0.5000 | 1.0000 | 1a |
| 63 | O36  | O  | 0.54056 | 0.21428 | 0.34258 | 0.5000 | 1.0000 | 1a |
| 64 | AL10 | Al | 0.01609 | 0.19060 | 0.67071 | 0.5000 | 1.0000 | 1a |
| 65 | AL11 | Al | 0.52449 | 0.19061 | 0.17187 | 0.5000 | 1.0000 | 1a |
| 66 | SI9  | Si | 0.28785 | 0.03708 | 0.03482 | 0.5000 | 1.0000 | 1a |
| 67 | SI10 | Si | 0.32035 | 0.36335 | 0.03691 | 0.5000 | 1.0000 | 1a |
| 68 | O37  | O  | 0.30549 | 0.05420 | 0.11720 | 0.5000 | 1.0000 | 1a |
| 69 | O38  | O  | 0.37025 | 0.35785 | 0.11792 | 0.5000 | 1.0000 | 1a |
| 70 | O39  | O  | 0.31347 | 0.66375 | 0.11967 | 0.5000 | 1.0000 | 1a |
| 71 | O40  | O  | 0.36558 | 0.20071 | 0.00291 | 0.5000 | 1.0000 | 1a |
| 72 | O41  | O  | 0.47973 | 0.90755 | 0.01316 | 0.5000 | 1.0000 | 1a |
| 73 | AL12 | Al | 0.01607 | 0.02366 | 0.17071 | 0.5000 | 1.0000 | 1a |
| 74 | H7   | H  | 0.39599 | 0.75339 | 0.10481 | 0.5000 | 1.0000 | 1a |
| 75 | H8   | H  | 0.39599 | 0.46088 | 0.60481 | 0.5000 | 1.0000 | 1a |
| 76 | SI11 | Si | 0.25273 | 0.03707 | 0.80777 | 0.5000 | 1.0000 | 1a |
| 77 | SI12 | Si | 0.22022 | 0.36334 | 0.80567 | 0.5000 | 1.0000 | 1a |
| 78 | O42  | O  | 0.23509 | 0.05420 | 0.72539 | 0.5000 | 1.0000 | 1a |



---

|    |     |   |         |         |         |        |        |    |
|----|-----|---|---------|---------|---------|--------|--------|----|
| 79 | O43 | O | 0.17032 | 0.35784 | 0.72467 | 0.5000 | 1.0000 | 1a |
| 80 | O44 | O | 0.22709 | 0.66375 | 0.72291 | 0.5000 | 1.0000 | 1a |
| 81 | O45 | O | 0.17498 | 0.20070 | 0.83967 | 0.5000 | 1.0000 | 1a |
| 82 | O46 | O | 0.06085 | 0.90754 | 0.82942 | 0.5000 | 1.0000 | 1a |
| 83 | O47 | O | 0.54058 | 0.99999 | 0.84259 | 0.5000 | 1.0000 | 1a |
| 84 | O48 | O | 0.00000 | 0.00000 | 0.00000 | 0.5000 | 1.0000 | 1a |

---

### Stick Pattern

Intensity [%]

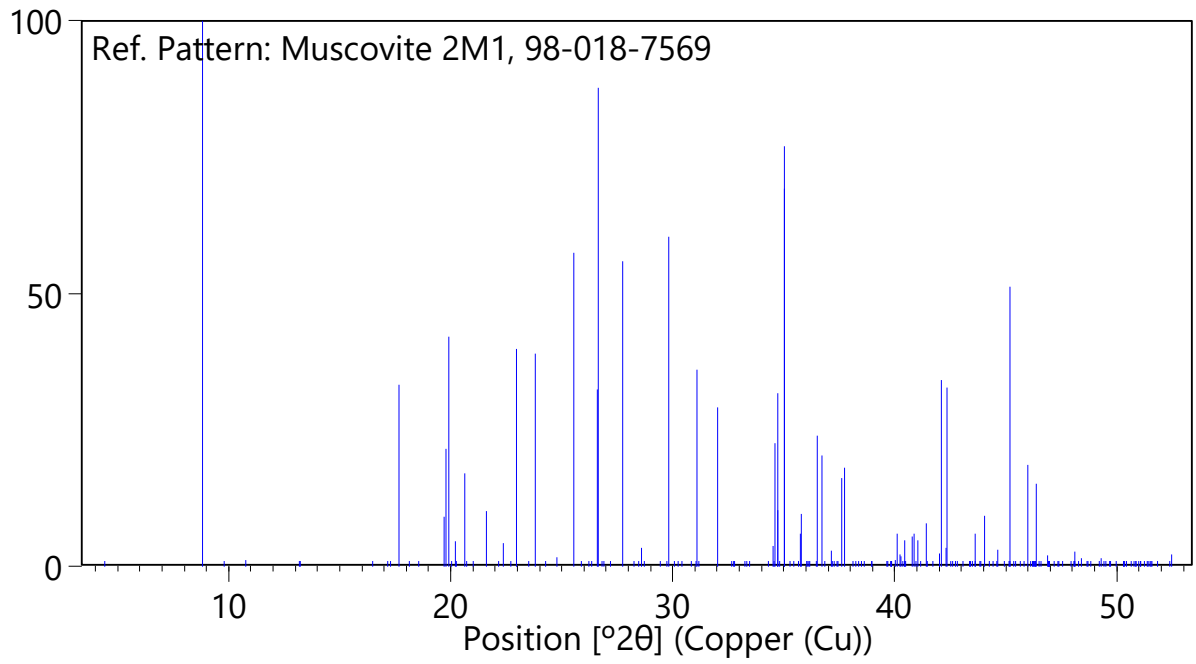

## Anchor Scan Parameters

Dataset Name rv-dthR  
File name D:\Mangesh\Application Support\Post Sales\Birbal Sahni, Lucknow\New folder\rv-dthR.xrdml  
Comment Configuration=Multi Purpose Sample Stage, Owner=User-1, Creation date=3/27/2015 3:44:05 PM  
Goniometer=PW3050/60 (Theta/Theta); Minimum step size 2Theta:0.001; Minimum step size Omega:0.001  
Sample stage=Multi purpose sample stage; Minimum step size Phi:2.5  
Diffractometer system=XPERT-3  
Measurement program=C:\PANalytical\Data Collector\Programs\Bulk Powder\_BBHD\_MPPS\_1D.xrdmp, Identifier={FA755B84-DF04-41AA-8AD7-C4E850FAC733}  
MPSS stage  
Measurement Start Date/Time 12-03-2021 13:21:15  
Operator User  
Raw Data Origin XRD measurement (\*.XRDML)  
Scan Axis Gonio  
Start Position [ $^{\circ}2\theta$ ] 4.0076  
End Position [ $^{\circ}2\theta$ ] 69.9956  
Step Size [ $^{\circ}2\theta$ ] 0.0130  
Scan Step Time [s] 29.0700  
Scan Type Continuous  
PSD Mode Scanning  
PSD Length [ $^{\circ}2\theta$ ] 3.35  
Offset [ $^{\circ}2\theta$ ] 0.0000  
Divergence Slit Type Fixed  
Divergence Slit Size [ $^{\circ}$ ] 0.2177  
Specimen Length [mm] 10.00  
Measurement Temperature [ $^{\circ}\text{C}$ ] 25.00  
Anode Material Cu  
Intended Wavelength Type K- $\alpha$ 1  
K- $\alpha$ 1 [ $\text{\AA}$ ] 1.54060  
K- $\alpha$ 2 [ $\text{\AA}$ ] 1.54443  
K- $\beta$ 1 [ $\text{\AA}$ ] 1.39225  
K- $\beta$ 2 [ $\text{\AA}$ ] 1.38113  
K- $\beta$ 3 [ $\text{\AA}$ ] 1.39261  
K-A2 / K-A1 Ratio 0.50000  
K-Alpha2 Line Shift 0.00000  
K Absorption Edge 1.37868  
Generator Settings 30 mA, 40 kV  
Diffractometer Type 0000000011166139

Diffractometer Number 0  
 Goniometer Radius [mm] 240.00  
 Dist. Focus-Diverg. Slit [mm] 100.00  
 Incident Beam Monochromator No  
 Spinning No

## Graphics

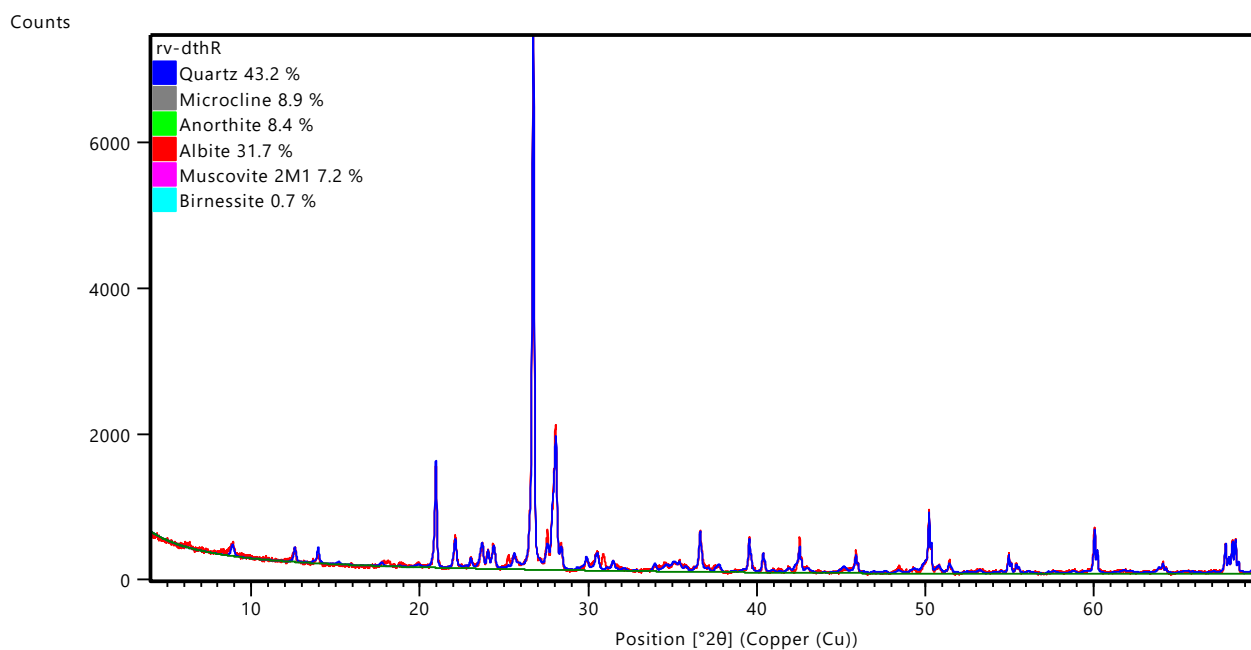

## Peak List

| Pos. [°2θ] | Height [cts] | FWHM Left [°2θ] | d-spacing [Å] | Rel. Int. [%] |
|------------|--------------|-----------------|---------------|---------------|
| 4.476      | 0.00         | 0.2001          | 19.72350      | 0.00          |
| 8.874      | 109.63       | 0.2001          | 9.95656       | 2.59          |
| 9.401      | 0.57         | 0.1342          | 9.40013       | 0.01          |
| 9.867      | 0.06         | 0.2001          | 8.95697       | 0.00          |
| 10.170     | 0.02         | 0.1342          | 8.69122       | 0.00          |
| 10.812     | 0.12         | 0.2001          | 8.17624       | 0.00          |
| 10.812     | 0.12         | 0.2001          | 8.17624       | 0.00          |
| 10.989     | 0.02         | 0.1342          | 8.04459       | 0.00          |
| 12.567     | 135.01       | 0.1696          | 7.03777       | 3.19          |
| 13.224     | 3.15         | 0.2600          | 6.68962       | 0.07          |
| 13.250     | 0.00         | 0.2001          | 6.67678       | 0.00          |
| 13.250     | 0.00         | 0.2001          | 6.67678       | 0.00          |
| 13.285     | 0.00         | 0.2001          | 6.65917       | 0.00          |
| 13.300     | 1.35         | 0.2600          | 6.65151       | 0.03          |
| 13.699     | 2.71         | 0.2600          | 6.45884       | 0.06          |

|        |        |        |         |      |
|--------|--------|--------|---------|------|
| 13.713 | 9.45   | 0.1342 | 6.45238 | 0.22 |
| 13.726 | 3.69   | 0.2600 | 6.44642 | 0.09 |
| 13.733 | 0.09   | 0.1342 | 6.44286 | 0.00 |
| 13.899 | 5.32   | 0.1556 | 6.36656 | 0.13 |
| 13.926 | 0.26   | 0.1342 | 6.35394 | 0.01 |
| 13.942 | 52.64  | 0.1556 | 6.34692 | 1.24 |
| 13.976 | 110.89 | 0.1556 | 6.33167 | 2.62 |
| 14.083 | 0.20   | 0.1342 | 6.28360 | 0.00 |
| 14.135 | 15.04  | 0.1556 | 6.26083 | 0.36 |
| 14.988 | 4.61   | 0.2600 | 5.90610 | 0.11 |
| 15.142 | 2.35   | 0.1342 | 5.84628 | 0.06 |
| 15.180 | 24.51  | 0.1555 | 5.83206 | 0.58 |
| 15.275 | 3.68   | 0.2600 | 5.79567 | 0.09 |
| 15.786 | 0.62   | 0.1342 | 5.60939 | 0.01 |
| 15.854 | 4.09   | 0.1555 | 5.58561 | 0.10 |
| 16.385 | 0.03   | 0.1342 | 5.40567 | 0.00 |
| 16.540 | 0.00   | 0.2001 | 5.35521 | 0.00 |
| 16.540 | 0.00   | 0.2001 | 5.35521 | 0.00 |
| 17.284 | 0.42   | 0.2001 | 5.12642 | 0.01 |
| 17.433 | 0.00   | 0.2001 | 5.08309 | 0.00 |
| 17.449 | 1.05   | 0.1342 | 5.07823 | 0.02 |
| 17.715 | 37.09  | 0.2001 | 5.00254 | 0.88 |
| 17.723 | 0.37   | 0.1342 | 5.00045 | 0.01 |
| 18.247 | 0.00   | 0.2001 | 4.85813 | 0.00 |
| 18.666 | 0.00   | 0.2001 | 4.74985 | 0.00 |
| 18.778 | 12.04  | 0.1342 | 4.72171 | 0.28 |
| 18.999 | 0.03   | 0.1342 | 4.66749 | 0.00 |
| 19.040 | 2.11   | 0.1554 | 4.65751 | 0.05 |
| 19.229 | 0.29   | 0.2600 | 4.61208 | 0.01 |
| 19.575 | 1.47   | 0.2600 | 4.53134 | 0.03 |
| 19.721 | 7.42   | 0.2001 | 4.49816 | 0.18 |
| 19.908 | 11.86  | 0.2001 | 4.45632 | 0.28 |
| 19.908 | 11.86  | 0.2001 | 4.45632 | 0.28 |
| 20.037 | 2.22   | 0.2001 | 4.42779 | 0.05 |
| 20.037 | 2.22   | 0.2001 | 4.42779 | 0.05 |
| 20.166 | 0.00   | 0.2001 | 4.39987 | 0.00 |
| 20.215 | 1.36   | 0.2001 | 4.38923 | 0.03 |
| 20.215 | 1.36   | 0.2001 | 4.38923 | 0.03 |
| 20.285 | 0.00   | 0.2001 | 4.37427 | 0.00 |
| 20.285 | 0.00   | 0.2001 | 4.37427 | 0.00 |
| 20.333 | 0.02   | 0.1342 | 4.36415 | 0.00 |

|        |         |        |         |       |
|--------|---------|--------|---------|-------|
| 20.384 | 1.40    | 0.1554 | 4.35326 | 0.03  |
| 20.752 | 5.75    | 0.2001 | 4.27680 | 0.14  |
| 20.752 | 5.75    | 0.2001 | 4.27680 | 0.14  |
| 20.796 | 0.43    | 0.1342 | 4.26787 | 0.01  |
| 20.798 | 0.00    | 0.2001 | 4.26749 | 0.00  |
| 20.847 | 54.15   | 0.2600 | 4.25772 | 1.28  |
| 20.950 | 1155.31 | 0.1518 | 4.23686 | 27.30 |
| 21.124 | 0.01    | 0.2001 | 4.20241 | 0.00  |
| 21.124 | 0.01    | 0.2001 | 4.20241 | 0.00  |
| 21.241 | 0.74    | 0.1342 | 4.17950 | 0.02  |
| 21.494 | 0.09    | 0.1342 | 4.13091 | 0.00  |
| 21.634 | 1.01    | 0.2001 | 4.10456 | 0.02  |
| 21.634 | 1.01    | 0.2001 | 4.10456 | 0.02  |
| 21.993 | 88.09   | 0.1342 | 4.03821 | 2.08  |
| 21.995 | 0.31    | 0.1342 | 4.03784 | 0.01  |
| 22.111 | 273.84  | 0.1554 | 4.01709 | 6.47  |
| 22.172 | 0.00    | 0.2001 | 4.00600 | 0.00  |
| 22.293 | 0.10    | 0.1342 | 3.98466 | 0.00  |
| 22.298 | 7.30    | 0.2600 | 3.98374 | 0.17  |
| 22.403 | 10.20   | 0.2600 | 3.96526 | 0.24  |
| 22.466 | 0.62    | 0.2001 | 3.95432 | 0.01  |
| 22.466 | 0.62    | 0.2001 | 3.95432 | 0.01  |
| 22.534 | 0.91    | 0.1342 | 3.94249 | 0.02  |
| 22.714 | 0.57    | 0.1342 | 3.91165 | 0.01  |
| 22.726 | 19.05   | 0.1342 | 3.90964 | 0.45  |
| 22.733 | 5.11    | 0.2600 | 3.90840 | 0.12  |
| 22.810 | 0.00    | 0.2001 | 3.89538 | 0.00  |
| 23.021 | 75.24   | 0.1554 | 3.86030 | 1.78  |
| 23.038 | 13.31   | 0.2001 | 3.85743 | 0.31  |
| 23.038 | 13.31   | 0.2001 | 3.85743 | 0.31  |
| 23.045 | 0.02    | 0.1342 | 3.85620 | 0.00  |
| 23.166 | 0.09    | 0.1342 | 3.83637 | 0.00  |
| 23.491 | 31.81   | 0.2600 | 3.78411 | 0.75  |
| 23.596 | 0.00    | 0.2001 | 3.76738 | 0.00  |
| 23.605 | 42.90   | 0.1342 | 3.76600 | 1.01  |
| 23.612 | 29.71   | 0.1342 | 3.76490 | 0.70  |
| 23.621 | 32.80   | 0.2600 | 3.76347 | 0.78  |
| 23.709 | 196.92  | 0.1554 | 3.74968 | 4.65  |
| 23.818 | 2.95    | 0.2001 | 3.73280 | 0.07  |
| 23.818 | 2.95    | 0.2001 | 3.73280 | 0.07  |
| 24.039 | 182.33  | 0.1554 | 3.69894 | 4.31  |

|        |        |        |         |      |
|--------|--------|--------|---------|------|
| 24.226 | 0.33   | 0.1342 | 3.67091 | 0.01 |
| 24.227 | 0.60   | 0.1342 | 3.67076 | 0.01 |
| 24.261 | 43.52  | 0.1342 | 3.66567 | 1.03 |
| 24.277 | 14.71  | 0.1342 | 3.66324 | 0.35 |
| 24.291 | 0.00   | 0.2001 | 3.66114 | 0.00 |
| 24.291 | 0.00   | 0.2001 | 3.66114 | 0.00 |
| 24.380 | 196.10 | 0.1555 | 3.64797 | 4.63 |
| 24.405 | 9.67   | 0.2600 | 3.64430 | 0.23 |
| 24.456 | 0.29   | 0.1555 | 3.63692 | 0.01 |
| 24.471 | 59.57  | 0.1555 | 3.63474 | 1.41 |
| 24.791 | 6.91   | 0.2600 | 3.58851 | 0.16 |
| 24.798 | 0.34   | 0.1342 | 3.58751 | 0.01 |
| 24.878 | 0.12   | 0.2001 | 3.57615 | 0.00 |
| 24.878 | 0.12   | 0.2001 | 3.57615 | 0.00 |
| 24.943 | 5.73   | 0.2600 | 3.56696 | 0.14 |
| 25.200 | 20.53  | 0.1696 | 3.53113 | 0.49 |
| 25.227 | 3.35   | 0.2600 | 3.52744 | 0.08 |
| 25.300 | 0.05   | 0.1342 | 3.51748 | 0.00 |
| 25.498 | 1.84   | 0.1342 | 3.49061 | 0.04 |
| 25.535 | 16.58  | 0.1342 | 3.48553 | 0.39 |
| 25.568 | 26.69  | 0.2600 | 3.48122 | 0.63 |
| 25.604 | 20.98  | 0.2001 | 3.47639 | 0.50 |
| 25.604 | 20.98  | 0.2001 | 3.47639 | 0.50 |
| 25.606 | 65.62  | 0.1555 | 3.47606 | 1.55 |
| 25.742 | 0.49   | 0.1555 | 3.45796 | 0.01 |
| 25.797 | 6.73   | 0.1342 | 3.45074 | 0.16 |
| 25.872 | 13.02  | 0.1556 | 3.44094 | 0.31 |
| 25.872 | 22.13  | 0.2600 | 3.44091 | 0.52 |
| 25.972 | 0.01   | 0.2001 | 3.42786 | 0.00 |
| 26.174 | 0.91   | 0.1342 | 3.40193 | 0.02 |
| 26.301 | 0.01   | 0.2001 | 3.38580 | 0.00 |
| 26.301 | 0.01   | 0.2001 | 3.38580 | 0.00 |
| 26.400 | 0.06   | 0.2001 | 3.37325 | 0.00 |
| 26.400 | 0.06   | 0.2001 | 3.37325 | 0.00 |
| 26.476 | 1.16   | 0.1556 | 3.36377 | 0.03 |
| 26.518 | 31.59  | 0.1342 | 3.35862 | 0.75 |
| 26.531 | 168.48 | 0.1556 | 3.35698 | 3.98 |
| 26.539 | 47.72  | 0.2600 | 3.35590 | 1.13 |
| 26.592 | 0.00   | 0.2001 | 3.34944 | 0.00 |
| 26.592 | 0.00   | 0.2001 | 3.34944 | 0.00 |
| 26.663 | 98.61  | 0.2001 | 3.34058 | 2.33 |

|        |         |        |         |        |
|--------|---------|--------|---------|--------|
| 26.695 | 46.97   | 0.2600 | 3.33672 | 1.11   |
| 26.732 | 4231.90 | 0.1520 | 3.33220 | 100.00 |
| 26.732 | 1918.50 | 0.1520 | 3.33220 | 45.33  |
| 26.867 | 0.00    | 0.2001 | 3.31575 | 0.00   |
| 26.955 | 0.00    | 0.2001 | 3.30511 | 0.00   |
| 26.955 | 0.00    | 0.2001 | 3.30511 | 0.00   |
| 27.079 | 50.40   | 0.2600 | 3.29029 | 1.19   |
| 27.246 | 1.09    | 0.2001 | 3.27046 | 0.03   |
| 27.246 | 1.09    | 0.2001 | 3.27046 | 0.03   |
| 27.509 | 69.69   | 0.2600 | 3.23978 | 1.65   |
| 27.537 | 63.70   | 0.1342 | 3.23652 | 1.51   |
| 27.563 | 25.66   | 0.2600 | 3.23353 | 0.61   |
| 27.579 | 71.69   | 0.1342 | 3.23174 | 1.69   |
| 27.819 | 5.60    | 0.2001 | 3.20438 | 0.13   |
| 27.819 | 5.60    | 0.2001 | 3.20438 | 0.13   |
| 27.839 | 117.49  | 0.1342 | 3.20208 | 2.78   |
| 27.875 | 404.21  | 0.1557 | 3.19803 | 9.55   |
| 27.917 | 40.94   | 0.1557 | 3.19335 | 0.97   |
| 27.974 | 112.28  | 0.1342 | 3.18700 | 2.65   |
| 28.005 | 400.59  | 0.1557 | 3.18347 | 9.47   |
| 28.075 | 1112.68 | 0.1557 | 3.17580 | 26.29  |
| 28.284 | 0.10    | 0.1342 | 3.15277 | 0.00   |
| 28.294 | 50.92   | 0.1342 | 3.15161 | 1.20   |
| 28.314 | 0.07    | 0.2001 | 3.14947 | 0.00   |
| 28.314 | 0.07    | 0.2001 | 3.14947 | 0.00   |
| 28.400 | 208.13  | 0.1558 | 3.14016 | 4.92   |
| 28.468 | 0.00    | 0.2001 | 3.13275 | 0.00   |
| 28.468 | 0.00    | 0.2001 | 3.13275 | 0.00   |
| 28.491 | 0.01    | 0.1342 | 3.13033 | 0.00   |
| 28.591 | 0.12    | 0.1342 | 3.11955 | 0.00   |
| 28.660 | 1.22    | 0.2001 | 3.11226 | 0.03   |
| 28.660 | 1.22    | 0.2001 | 3.11226 | 0.03   |

## Document History

Insert Measurement:

- File name = "Rvdth-airdried complete angle.xrdml"
- Modification time = "8/19/2021 7:14:43 AM"
- Modification editor = "Sandeep Nagar"

Default properties:

- Measurement step axis = "None"



- Internal wavelengths used from anode material: Copper (Cu)
- Original K-Alpha1 wavelength = "1.54060"
- Used K-Alpha1 wavelength = "1.54060"
- Original K-Alpha2 wavelength = "1.54443"
- Used K-Alpha2 wavelength = "1.54443"
- Original K-Beta wavelength = "1.39225"
- Used K-Beta wavelength = "1.39225"
- Irradiated length = "10.00000"
- Spinner used = "No"
- KBeta filter material = "Ni"
- KBeta filter thickness = "0.02000"
- Receiving slit size = "0.10000"
- Step axis value = "0.00000"
- Offset = "0.00000"
- Sample length = "10.00000"
- Modification time = "8/19/2021 7:14:43 AM"
- Modification editor = "Sandeep Nagar"

#### Interpolate Step Size:

- Initial Scan Range = 3.00257 - 69.99330
- Initial Step Size = 0.01313
- Derived Step Size = 0.01300
- Use Derived Step Size = "Yes"
- Parameterset name = "Default"
- PANalytical factory default
- Modification time = "8/19/2021 7:14:43 AM"
- Modification editor = "Sandeep Nagar"

#### Clip Range:

- Old/New start = "3.0026/5.2650"
- Old/New end = "69.9916/69.9920"
- Modification time = "8/19/2021 7:15:08 AM"
- Modification editor = "Sandeep Nagar"

#### Determine Background:

- Add to net scan = "Nothing"
- User defined intensity = "0"
- Correction method = "Automatic"
- Bending factor = "0"
- Minimum significance = "1"
- Minimum tip width = "0.01"
- Maximum tip width = "1"

- Peak base width = "2"
- Use smoothed input data = "Yes"
- Granularity = "100"
- Parameterset name = "Untitled"
- Parameterset modification time = "8/19/2021 7:15:32 AM"
- Parameterset modification editor = "Sandeep Nagar"
- Modification time = "8/19/2021 7:15:58 AM"
- Modification editor = "Sandeep Nagar"

## Search Peaks:

- Minimum significance = "1"
- Minimum tip width = "0.01"
- Maximum tip width = "1"
- Peak base width = "2"
- Method = "Minimum 2nd derivative"
- Parameterset name = "Untitled"
- Parameterset modification time = "8/5/2021 9:09:30 AM"
- Parameterset modification editor = "Sandeep Nagar"
- Modification time = "8/19/2021 7:16:07 AM"
- Modification editor = "Sandeep Nagar"

## Profile/Rietveld fitting:

- Angular range Gonio = 5.278 - 69.992
- Step No. 1
- Title = "Flat Background"
- Switch off after usage = "No"
- Step No. 2
- Title = "More background"
- Switch off after usage = "No"
- No. additional parameters = "2"
- Use 1/X background too = "Yes"
- Step No. 3
- Title = "Peak Position"
- Switch off after usage = "No"
- Minimum Irelative % = "-1"
- Step No. 4
- Title = "Peak Area"
- Switch off after usage = "No"
- Minimum Irelative % = "-1"
- Step No. 5
- Title = "Peak FWHM"
- Switch off after usage = "No"

- Minimum Irelative % = "-1"
- Step No. 6
- Title = "Peak Shape"
- Switch off after usage = "No"
- Minimum Irelative % = "-1"
- No. of refined parameters = 192
- Chi Square = 1.22437312181155
- Rp = 0.07094
- Rwp = 0.09384
- Rexp = 0.07664
- Modification time = "8/19/2021 7:16:24 AM"
- Modification editor = "Sandeep Nagar"

## Insert Peak:

- Peak position Gonio = "30.7887"
- Modification time = "8/19/2021 7:17:01 AM"
- Modification editor = "Sandeep Nagar"

## Profile/Rietveld fitting:

- Angular range Gonio = 5.278 - 69.992
- Step No. 1
- Title = "Flat Background"
- Switch off after usage = "No"
- Step No. 2
- Title = "More background"
- Switch off after usage = "No"
- No. additional parameters = "2"
- Use 1/X background too = "Yes"
- Step No. 3
- Title = "Peak Position"
- Switch off after usage = "No"
- Minimum Irelative % = "-1"
- Step No. 4
- Title = "Peak Area"
- Switch off after usage = "No"
- Minimum Irelative % = "-1"
- Step No. 5
- Title = "Peak FWHM"
- Switch off after usage = "No"
- Minimum Irelative % = "-1"
- Step No. 6
- Title = "Peak Shape"

- Switch off after usage = "No"
- Minimum Irelative % = "-1"
- No. of refined parameters = 196
- Chi Square = 1.17091361832959
- Rp = 0.06731
- Rwp = 0.08970
- Rexp = 0.07661
- Modification time = "8/19/2021 7:17:41 AM"
- Modification editor = "Sandeep Nagar"

## Search &amp; Match:

- Allow pattern shift = "No"
- Auto residue = "Yes"
- Data source = "Profile and peak list"
- Demote unmatched strong = "Yes"
- Multi phase = "Yes"
- Restriction set = "Untitled"
- Restriction = "Restriction set"
- Subset name = ""
- Match intensity = "Yes"
- Two theta shift = "0"
- Identify = "No"
- Max. no. of accepted patterns = "5"
- Minimum score = "50"
- Min. new lines / total lines = "60"
- Search depth = "10"
- Minimum new lines = "5"
- Minimum scale factor = "0.1"
- Intensity threshold = "0"
- Use line clustering = "Yes"
- Line cluster range = "1.5"
- Search sensitivity = "1.8"
- Use adaptive smoothing = "Yes"
- Smoothing range = "1.5"
- Threshold factor = "3"
- Match Threshold = "0"
- N \* Esds = "-1"
- Raw Weight = "-1"
- Peak Shape = "-1"
- Accepted Shape = "-1"
- Peak Power = "-1"
- New Peak Power = "-1"

- Intensity Power = "-1"
- N Peaks Power = "-1"
- Parameterset name = "Untitled"
- Parameterset modification time = "8/19/2021 7:18:49 AM"
- Parameterset modification editor = "Sandeep Nagar"
- Modification time = "8/19/2021 7:19:53 AM"
- Modification editor = "Sandeep Nagar"

## Search &amp; Match:

- Allow pattern shift = "No"
- Auto residue = "Yes"
- Data source = "Profile and peak list"
- Demote unmatched strong = "Yes"
- Multi phase = "Yes"
- Restriction set = "Untitled"
- Restriction = "Restriction set"
- Subset name = ""
- Match intensity = "Yes"
- Two theta shift = "0"
- Identify = "No"
- Max. no. of accepted patterns = "5"
- Minimum score = "50"
- Min. new lines / total lines = "60"
- Search depth = "10"
- Minimum new lines = "5"
- Minimum scale factor = "0.1"
- Intensity threshold = "0"
- Use line clustering = "Yes"
- Line cluster range = "1.5"
- Search sensitivity = "1.8"
- Use adaptive smoothing = "Yes"
- Smoothing range = "1.5"
- Threshold factor = "3"
- Match Threshold = "0"
- N \* Esds = "-1"
- Raw Weight = "-1"
- Peak Shape = "-1"
- Accepted Shape = "-1"
- Peak Power = "-1"
- New Peak Power = "-1"
- Intensity Power = "-1"
- N Peaks Power = "-1"

- Parameterset name = "Untitled"
- Parameterset modification time = "8/19/2021 7:22:01 AM"
- Parameterset modification editor = "Sandeep Nagar"
- Modification time = "8/19/2021 7:22:07 AM"
- Modification editor = "Sandeep Nagar"

## Search &amp; Match:

- Allow pattern shift = "No"
- Auto residue = "Yes"
- Data source = "Profile and peak list"
- Demote unmatched strong = "Yes"
- Multi phase = "Yes"
- Restriction set = "Untitled"
- Restriction = "Restriction set"
- Subset name = ""
- Match intensity = "Yes"
- Two theta shift = "0"
- Identify = "No"
- Max. no. of accepted patterns = "5"
- Minimum score = "50"
- Min. new lines / total lines = "60"
- Search depth = "10"
- Minimum new lines = "5"
- Minimum scale factor = "0.1"
- Intensity threshold = "0"
- Use line clustering = "Yes"
- Line cluster range = "1.5"
- Search sensitivity = "1.8"
- Use adaptive smoothing = "Yes"
- Smoothing range = "1.5"
- Threshold factor = "3"
- Match Threshold = "0"
- N \* Esds = "-1"
- Raw Weight = "-1"
- Peak Shape = "-1"
- Accepted Shape = "-1"
- Peak Power = "-1"
- New Peak Power = "-1"
- Intensity Power = "-1"
- N Peaks Power = "-1"
- Parameterset name = "Untitled"
- Parameterset modification time = "8/19/2021 7:23:19 AM"

- Parameterset modification editor = "Sandeep Nagar"
- Modification time = "8/19/2021 7:23:26 AM"
- Modification editor = "Sandeep Nagar"

## Search &amp; Match:

- Allow pattern shift = "No"
- Auto residue = "Yes"
- Data source = "Profile and peak list"
- Demote unmatched strong = "Yes"
- Multi phase = "Yes"
- Restriction set = "Untitled"
- Restriction = "Restriction set"
- Subset name = ""
- Match intensity = "Yes"
- Two theta shift = "0"
- Identify = "No"
- Max. no. of accepted patterns = "5"
- Minimum score = "50"
- Min. new lines / total lines = "60"
- Search depth = "10"
- Minimum new lines = "5"
- Minimum scale factor = "0.1"
- Intensity threshold = "0"
- Use line clustering = "Yes"
- Line cluster range = "1.5"
- Search sensitivity = "1.8"
- Use adaptive smoothing = "Yes"
- Smoothing range = "1.5"
- Threshold factor = "3"
- Match Threshold = "0"
- N \* Esds = "-1"
- Raw Weight = "-1"
- Peak Shape = "-1"
- Accepted Shape = "-1"
- Peak Power = "-1"
- New Peak Power = "-1"
- Intensity Power = "-1"
- N Peaks Power = "-1"
- Parameterset name = "Untitled"
- Parameterset modification time = "8/19/2021 7:24:28 AM"
- Parameterset modification editor = "Sandeep Nagar"
- Modification time = "8/19/2021 7:24:32 AM"

- Modification editor = "Sandeep Nagar"

Convert Ref. Pattern to Phase:

- Modification time = "8/19/2021 7:24:49 AM"

- Modification editor = "Sandeep Nagar"

Search & Match:

- Allow pattern shift = "No"

- Auto residue = "Yes"

- Data source = "Profile and peak list"

- Demote unmatched strong = "Yes"

- Multi phase = "Yes"

- Restriction set = "Untitled"

- Restriction = "Restriction set"

- Subset name = ""

- Match intensity = "Yes"

- Two theta shift = "0"

- Identify = "No"

- Max. no. of accepted patterns = "5"

- Minimum score = "50"

- Min. new lines / total lines = "60"

- Search depth = "10"

- Minimum new lines = "5"

- Minimum scale factor = "0.1"

- Intensity threshold = "0"

- Use line clustering = "Yes"

- Line cluster range = "1.5"

- Search sensitivity = "1.8"

- Use adaptive smoothing = "Yes"

- Smoothing range = "1.5"

- Threshold factor = "3"

- Match Threshold = "0"

- N \* Esds = "-1"

- Raw Weight = "-1"

- Peak Shape = "-1"

- Accepted Shape = "-1"

- Peak Power = "-1"

- New Peak Power = "-1"

- Intensity Power = "-1"

- N Peaks Power = "-1"

- Parameterset name = "Untitled"

- Parameterset modification time = "8/19/2021 7:25:46 AM"



- Parameterset modification editor = "Sandeep Nagar"
- Modification time = "8/19/2021 7:25:54 AM"
- Modification editor = "Sandeep Nagar"

## Delete All Phases:

- Modification time = "8/19/2021 7:26:53 AM"
- Modification editor = "Sandeep Nagar"

## Convert Ref. Pattern to Phase:

- Modification time = "8/19/2021 7:27:00 AM"
- Modification editor = "Sandeep Nagar"

## Profile/Rietveld fitting:

- Angular range Gonio = 5.278 - 69.992
- Step No. 1
- Title = "Scale Factor"
- Switch off after usage = "No"
- Step No. 2
- Title = "Flat Background"
- Switch off after usage = "No"
- Step No. 3
- Title = "More background"
- Switch off after usage = "No"
- No. additional parameters = "2"
- Use 1/X background too = "Yes"
- Step No. 4
- Title = "Specimen Displacement"
- Switch off after usage = "No"
- Step No. 5
- Title = "Lattice Parameters"
- Switch off after usage = "No"
- Minimum weight % = "5"
- Step No. 6
- Title = "Caglioti W"
- Switch off after usage = "No"
- Minimum weight % = "5"
- No. of refined parameters = 36
- Chi Square = 1.66442755486243
- Rp = 0.09940
- Rwp = 0.12962
- Rexp = 0.07788
- Modification time = "8/19/2021 7:28:09 AM"

- Modification editor = "Sandeep Nagar"

Edit Quartz, syn Preferred Orientation Model:

- Old Value = "March/Dollase Model"
- Modification time = "8/19/2021 7:28:33 AM"
- Modification editor = "Sandeep Nagar"

Change Quartz, syn Coefficient Y20 Refinement Flag:

- Old Value = "False"
- Modification time = "8/19/2021 7:28:36 AM"
- Modification editor = "Sandeep Nagar"

Change Quartz, syn Coefficient Y40 Refinement Flag:

- Old Value = "False"
- Modification time = "8/19/2021 7:28:37 AM"
- Modification editor = "Sandeep Nagar"

Change Quartz, syn Coefficient Y43p Refinement Flag:

- Old Value = "False"
- Modification time = "8/19/2021 7:28:38 AM"
- Modification editor = "Sandeep Nagar"

Change Quartz, syn Coefficient Y60 Refinement Flag:

- Old Value = "False"
- Modification time = "8/19/2021 7:28:38 AM"
- Modification editor = "Sandeep Nagar"

Change Quartz, syn Coefficient Y63p Refinement Flag:

- Old Value = "False"
- Modification time = "8/19/2021 7:28:39 AM"
- Modification editor = "Sandeep Nagar"

Change Quartz, syn Coefficient Y66p Refinement Flag:

- Old Value = "False"
- Modification time = "8/19/2021 7:28:39 AM"
- Modification editor = "Sandeep Nagar"

Edit Method:

- Old Value = "Polynomial"
- Modification time = "8/19/2021 7:28:51 AM"
- Modification editor = "Sandeep Nagar"

## Edit Use Extended Background Terms:

- Old Value = "False"
- Modification time = "8/19/2021 7:28:52 AM"
- Modification editor = "Sandeep Nagar"

## Change Flat background Refinement Flag:

- Old Value = "False"
- Modification time = "8/19/2021 7:29:04 AM"
- Modification editor = "Sandeep Nagar"

## Change 1/X Background Refinement Flag:

- Old Value = "False"
- Modification time = "8/19/2021 7:29:05 AM"
- Modification editor = "Sandeep Nagar"

## Change Coefficient 1 Refinement Flag:

- Old Value = "False"
- Modification time = "8/19/2021 7:29:06 AM"
- Modification editor = "Sandeep Nagar"

## Change Coefficient 2 Refinement Flag:

- Old Value = "False"
- Modification time = "8/19/2021 7:29:07 AM"
- Modification editor = "Sandeep Nagar"

## Change Coefficient 3 Refinement Flag:

- Old Value = "False"
- Modification time = "8/19/2021 7:29:07 AM"
- Modification editor = "Sandeep Nagar"

## Change Coefficient 4 Refinement Flag:

- Old Value = "False"
- Modification time = "8/19/2021 7:29:08 AM"
- Modification editor = "Sandeep Nagar"

## Change Coefficient 5 Refinement Flag:

- Old Value = "False"
- Modification time = "8/19/2021 7:29:09 AM"
- Modification editor = "Sandeep Nagar"

## Change Coefficient 6 Refinement Flag:

- Old Value = "False"

- Modification time = "8/19/2021 7:29:09 AM"
- Modification editor = "Sandeep Nagar"

## Change Coefficient 7 Refinement Flag:

- Old Value = "False"
- Modification time = "8/19/2021 7:29:10 AM"
- Modification editor = "Sandeep Nagar"

## Change Coefficient 8 Refinement Flag:

- Old Value = "False"
- Modification time = "8/19/2021 7:29:11 AM"
- Modification editor = "Sandeep Nagar"

## Change Coefficient 9 Refinement Flag:

- Old Value = "False"
- Modification time = "8/19/2021 7:29:14 AM"
- Modification editor = "Sandeep Nagar"

## Change Coefficient 10 Refinement Flag:

- Old Value = "False"
- Modification time = "8/19/2021 7:29:15 AM"
- Modification editor = "Sandeep Nagar"

## Change Coefficient 11 Refinement Flag:

- Old Value = "False"
- Modification time = "8/19/2021 7:29:15 AM"
- Modification editor = "Sandeep Nagar"

## Change Coefficient 12 Refinement Flag:

- Old Value = "False"
- Modification time = "8/19/2021 7:29:16 AM"
- Modification editor = "Sandeep Nagar"

## Change Coefficient 13 Refinement Flag:

- Old Value = "False"
- Modification time = "8/19/2021 7:29:17 AM"
- Modification editor = "Sandeep Nagar"

## Change Coefficient 14 Refinement Flag:

- Old Value = "False"
- Modification time = "8/19/2021 7:29:17 AM"
- Modification editor = "Sandeep Nagar"

Change Coefficient 15 Refinement Flag:

- Old Value = "False"
- Modification time = "8/19/2021 7:29:21 AM"
- Modification editor = "Sandeep Nagar"

Change Coefficient 16 Refinement Flag:

- Old Value = "False"
- Modification time = "8/19/2021 7:29:22 AM"
- Modification editor = "Sandeep Nagar"

Change Coefficient 17 Refinement Flag:

- Old Value = "False"
- Modification time = "8/19/2021 7:29:23 AM"
- Modification editor = "Sandeep Nagar"

Change Coefficient 18 Refinement Flag:

- Old Value = "False"
- Modification time = "8/19/2021 7:29:23 AM"
- Modification editor = "Sandeep Nagar"

Change Coefficient 19 Refinement Flag:

- Old Value = "False"
- Modification time = "8/19/2021 7:29:24 AM"
- Modification editor = "Sandeep Nagar"

Change Coefficient 20 Refinement Flag:

- Old Value = "False"
- Modification time = "8/19/2021 7:29:24 AM"
- Modification editor = "Sandeep Nagar"

Change Coefficient 21 Refinement Flag:

- Old Value = "False"
- Modification time = "8/19/2021 7:29:25 AM"
- Modification editor = "Sandeep Nagar"

Change Coefficient 22 Refinement Flag:

- Old Value = "False"
- Modification time = "8/19/2021 7:29:26 AM"
- Modification editor = "Sandeep Nagar"

Change Coefficient 23 Refinement Flag:

- Old Value = "False"
- Modification time = "8/19/2021 7:29:28 AM"
- Modification editor = "Sandeep Nagar"

## Profile/Rietveld fitting:

- Angular range Gonio = "5.278 - 69.992"
- Refinement Mode = "Manual"
- No. of refined parameters = "63"
- Chi Square = "1.38017091062857"
- Rp = "0.08074"
- Rwp = "0.10719"
- Rexp = "0.07767"
- Modification time = "8/19/2021 7:29:53 AM"
- Modification editor = "Sandeep Nagar"

## Change Quartz, syn Profile Caglioti V Left Refinement Flag:

- Old Value = "False"
- Modification time = "8/19/2021 7:30:09 AM"
- Modification editor = "Sandeep Nagar"

## Profile/Rietveld fitting:

- Angular range Gonio = "5.278 - 69.992"
- Refinement Mode = "Manual"
- No. of refined parameters = "64"
- Chi Square = "1.37956857548839"
- Rp = "0.08067"
- Rwp = "0.10713"
- Rexp = "0.07766"
- Modification time = "8/19/2021 7:30:21 AM"
- Modification editor = "Sandeep Nagar"

## Edit Quartz, syn Asymmetry Type:

- Old Value = "No Asymmetry Function"
- Modification time = "8/19/2021 7:30:32 AM"
- Modification editor = "Sandeep Nagar"

## Change Quartz, syn S/L Asymmetry Refinement Flag:

- Old Value = "False"
- Modification time = "8/19/2021 7:30:35 AM"
- Modification editor = "Sandeep Nagar"

## Change Quartz, syn D/L Asymmetry Refinement Flag:

- Old Value = "False"
- Modification time = "8/19/2021 7:30:36 AM"
- Modification editor = "Sandeep Nagar"

Change Quartz, syn Peak Shape 1 Left Refinement Flag:

- Old Value = "False"
- Modification time = "8/19/2021 7:30:36 AM"
- Modification editor = "Sandeep Nagar"

Profile/Rietveld fitting:

- Angular range Gonio = "5.278 - 69.992"
- Refinement Mode = "Manual"
- No. of refined parameters = "67"
- Chi Square = "1.35820700644622"
- Rp = "0.07946"
- Rwp = "0.10544"
- Rexp = "0.07763"
- Modification time = "8/19/2021 7:30:56 AM"
- Modification editor = "Sandeep Nagar"

Change Quartz, syn Peak Shape 2 Left Refinement Flag:

- Old Value = "False"
- Modification time = "8/19/2021 7:30:58 AM"
- Modification editor = "Sandeep Nagar"

Profile/Rietveld fitting:

- Angular range Gonio = "5.278 - 69.992"
- Refinement Mode = "Manual"
- No. of refined parameters = "68"
- Chi Square = "1.33809032483275"
- Rp = "0.07861"
- Rwp = "0.10387"
- Rexp = "0.07763"
- Modification time = "8/19/2021 7:31:10 AM"
- Modification editor = "Sandeep Nagar"

Edit Quartz, syn Preferred Orientation Model:

- Old Value = "Spherical Harmonics"
- Modification time = "8/19/2021 7:31:54 AM"
- Modification editor = "Sandeep Nagar"

Edit Quartz, syn Direction h:

- Old Value = "0"
- Modification time = "8/19/2021 7:31:56 AM"
- Modification editor = "Sandeep Nagar"

Edit Quartz, syn Direction I:

- Old Value = "1"
- Modification time = "8/19/2021 7:32:00 AM"
- Modification editor = "Sandeep Nagar"

Edit Quartz, syn Parameter (March/Dollase) 1:

- Old Value = "1"
- Modification time = "8/19/2021 7:32:03 AM"
- Modification editor = "Sandeep Nagar"

Profile/Rietveld fitting:

- Angular range Gonio = "5.278 - 69.992"
- Refinement Mode = "Manual"
- No. of refined parameters = "62"
- Chi Square = "1.56178032982541"
- Rp = "0.08689"
- Rwp = "0.12131"
- Rexp = "0.07767"
- Modification time = "8/19/2021 7:32:36 AM"
- Modification editor = "Sandeep Nagar"

Change Quartz, syn March-Dollase Factor Refinement Flag:

- Old Value = "False"
- Modification time = "8/19/2021 7:32:38 AM"
- Modification editor = "Sandeep Nagar"

Profile/Rietveld fitting:

- Angular range Gonio = "5.278 - 69.992"
- Refinement Mode = "Manual"
- No. of refined parameters = "63"
- Chi Square = "1.32365171825994"
- Rp = "0.07733"
- Rwp = "0.10280"
- Rexp = "0.07767"
- Modification time = "8/19/2021 7:33:00 AM"
- Modification editor = "Sandeep Nagar"

Edit Albite (heat-treated) Preferred Orientation Model:



- Old Value = "March/Dollase Model"
- Modification time = "8/19/2021 7:33:21 AM"
- Modification editor = "Sandeep Nagar"

Change Albite (heat-treated) Coefficient Y20 Refinement Flag:

- Old Value = "False"
- Modification time = "8/19/2021 7:33:27 AM"
- Modification editor = "Sandeep Nagar"

Change Albite (heat-treated) Coefficient Y21p Refinement Flag:

- Old Value = "False"
- Modification time = "8/19/2021 7:33:28 AM"
- Modification editor = "Sandeep Nagar"

Change Albite (heat-treated) Coefficient Y21m Refinement Flag:

- Old Value = "False"
- Modification time = "8/19/2021 7:33:29 AM"
- Modification editor = "Sandeep Nagar"

Change Albite (heat-treated) Coefficient Y22p Refinement Flag:

- Old Value = "False"
- Modification time = "8/19/2021 7:33:29 AM"
- Modification editor = "Sandeep Nagar"

Change Albite (heat-treated) Coefficient Y22m Refinement Flag:

- Old Value = "False"
- Modification time = "8/19/2021 7:33:30 AM"
- Modification editor = "Sandeep Nagar"

Change Albite (heat-treated) Coefficient Y40 Refinement Flag:

- Old Value = "False"
- Modification time = "8/19/2021 7:33:30 AM"
- Modification editor = "Sandeep Nagar"

Change Albite (heat-treated) Coefficient Y41p Refinement Flag:

- Old Value = "False"
- Modification time = "8/19/2021 7:33:31 AM"
- Modification editor = "Sandeep Nagar"

Change Albite (heat-treated) Coefficient Y41m Refinement Flag:

- Old Value = "False"
- Modification time = "8/19/2021 7:33:31 AM"

- Modification editor = "Sandeep Nagar"

Change Albite (heat-treated) Coefficient Y42p Refinement Flag:

- Old Value = "False"

- Modification time = "8/19/2021 7:33:32 AM"

- Modification editor = "Sandeep Nagar"

Change Albite (heat-treated) Coefficient Y42m Refinement Flag:

- Old Value = "False"

- Modification time = "8/19/2021 7:33:35 AM"

- Modification editor = "Sandeep Nagar"

Change Albite (heat-treated) Coefficient Y43p Refinement Flag:

- Old Value = "False"

- Modification time = "8/19/2021 7:33:36 AM"

- Modification editor = "Sandeep Nagar"

Change Albite (heat-treated) Coefficient Y43m Refinement Flag:

- Old Value = "False"

- Modification time = "8/19/2021 7:33:36 AM"

- Modification editor = "Sandeep Nagar"

Change Albite (heat-treated) Coefficient Y44p Refinement Flag:

- Old Value = "False"

- Modification time = "8/19/2021 7:33:37 AM"

- Modification editor = "Sandeep Nagar"

Change Albite (heat-treated) Coefficient Y44m Refinement Flag:

- Old Value = "False"

- Modification time = "8/19/2021 7:33:37 AM"

- Modification editor = "Sandeep Nagar"

Change Albite (heat-treated) Coefficient Y60 Refinement Flag:

- Old Value = "False"

- Modification time = "8/19/2021 7:33:38 AM"

- Modification editor = "Sandeep Nagar"

Change Albite (heat-treated) Coefficient Y61p Refinement Flag:

- Old Value = "False"

- Modification time = "8/19/2021 7:33:38 AM"

- Modification editor = "Sandeep Nagar"

Change Albite (heat-treated) Coefficient Y61m Refinement Flag:

- Old Value = "False"
- Modification time = "8/19/2021 7:33:39 AM"
- Modification editor = "Sandeep Nagar"

Change Albite (heat-treated) Coefficient Y62p Refinement Flag:

- Old Value = "False"
- Modification time = "8/19/2021 7:33:42 AM"
- Modification editor = "Sandeep Nagar"

Change Albite (heat-treated) Coefficient Y62m Refinement Flag:

- Old Value = "False"
- Modification time = "8/19/2021 7:33:42 AM"
- Modification editor = "Sandeep Nagar"

Change Albite (heat-treated) Coefficient Y63p Refinement Flag:

- Old Value = "False"
- Modification time = "8/19/2021 7:33:43 AM"
- Modification editor = "Sandeep Nagar"

Change Albite (heat-treated) Coefficient Y63m Refinement Flag:

- Old Value = "False"
- Modification time = "8/19/2021 7:33:44 AM"
- Modification editor = "Sandeep Nagar"

Change Albite (heat-treated) Coefficient Y64p Refinement Flag:

- Old Value = "False"
- Modification time = "8/19/2021 7:33:44 AM"
- Modification editor = "Sandeep Nagar"

Change Albite (heat-treated) Coefficient Y64m Refinement Flag:

- Old Value = "False"
- Modification time = "8/19/2021 7:33:45 AM"
- Modification editor = "Sandeep Nagar"

Change Albite (heat-treated) Coefficient Y65p Refinement Flag:

- Old Value = "False"
- Modification time = "8/19/2021 7:33:45 AM"
- Modification editor = "Sandeep Nagar"

Change Albite (heat-treated) Coefficient Y65m Refinement Flag:

- Old Value = "False"

- Modification time = "8/19/2021 7:33:46 AM"
- Modification editor = "Sandeep Nagar"

Change Albite (heat-treated) Coefficient Y66p Refinement Flag:

- Old Value = "False"
- Modification time = "8/19/2021 7:33:49 AM"
- Modification editor = "Sandeep Nagar"

Change Albite (heat-treated) Coefficient Y66m Refinement Flag:

- Old Value = "False"
- Modification time = "8/19/2021 7:33:50 AM"
- Modification editor = "Sandeep Nagar"

Profile/Rietveld fitting:

- Angular range Gonio = "5.278 - 69.992"
- Refinement Mode = "Manual"
- No. of refined parameters = "90"
- Chi Square = "1.20193345748222"
- Rp = "0.06998"
- Rwp = "0.09309"
- Rexp = "0.07745"
- Modification time = "8/19/2021 7:34:08 AM"
- Modification editor = "Sandeep Nagar"

Edit Microcline, intermediate Preferred Orientation Model:

- Old Value = "March/Dollase Model"
- Modification time = "8/19/2021 7:34:56 AM"
- Modification editor = "Sandeep Nagar"

Change Microcline, intermediate Coefficient Y20 Refinement Flag:

- Old Value = "False"
- Modification time = "8/19/2021 7:34:59 AM"
- Modification editor = "Sandeep Nagar"

Change Microcline, intermediate Coefficient Y21p Refinement Flag:

- Old Value = "False"
- Modification time = "8/19/2021 7:35:00 AM"
- Modification editor = "Sandeep Nagar"

Change Microcline, intermediate Coefficient Y21m Refinement Flag:

- Old Value = "False"
- Modification time = "8/19/2021 7:35:00 AM"

- Modification editor = "Sandeep Nagar"

Change Microcline, intermediate Coefficient Y22p Refinement Flag:

- Old Value = "False"

- Modification time = "8/19/2021 7:35:01 AM"

- Modification editor = "Sandeep Nagar"

Change Microcline, intermediate Coefficient Y22m Refinement Flag:

- Old Value = "False"

- Modification time = "8/19/2021 7:35:02 AM"

- Modification editor = "Sandeep Nagar"

Change Microcline, intermediate Coefficient Y40 Refinement Flag:

- Old Value = "False"

- Modification time = "8/19/2021 7:35:02 AM"

- Modification editor = "Sandeep Nagar"

Change Microcline, intermediate Coefficient Y41p Refinement Flag:

- Old Value = "False"

- Modification time = "8/19/2021 7:35:05 AM"

- Modification editor = "Sandeep Nagar"

Change Microcline, intermediate Coefficient Y41m Refinement Flag:

- Old Value = "False"

- Modification time = "8/19/2021 7:35:05 AM"

- Modification editor = "Sandeep Nagar"

Change Microcline, intermediate Coefficient Y42p Refinement Flag:

- Old Value = "False"

- Modification time = "8/19/2021 7:35:06 AM"

- Modification editor = "Sandeep Nagar"

Change Microcline, intermediate Coefficient Y42m Refinement Flag:

- Old Value = "False"

- Modification time = "8/19/2021 7:35:07 AM"

- Modification editor = "Sandeep Nagar"

Change Microcline, intermediate Coefficient Y43p Refinement Flag:

- Old Value = "False"

- Modification time = "8/19/2021 7:35:07 AM"

- Modification editor = "Sandeep Nagar"

Change Microcline, intermediate Coefficient Y43m Refinement Flag:

- Old Value = "False"
- Modification time = "8/19/2021 7:35:08 AM"
- Modification editor = "Sandeep Nagar"

Change Microcline, intermediate Coefficient Y44p Refinement Flag:

- Old Value = "False"
- Modification time = "8/19/2021 7:35:09 AM"
- Modification editor = "Sandeep Nagar"

Change Microcline, intermediate Coefficient Y44m Refinement Flag:

- Old Value = "False"
- Modification time = "8/19/2021 7:35:09 AM"
- Modification editor = "Sandeep Nagar"

Change Microcline, intermediate Coefficient Y60 Refinement Flag:

- Old Value = "False"
- Modification time = "8/19/2021 7:35:12 AM"
- Modification editor = "Sandeep Nagar"

Change Microcline, intermediate Coefficient Y61p Refinement Flag:

- Old Value = "False"
- Modification time = "8/19/2021 7:35:13 AM"
- Modification editor = "Sandeep Nagar"

Change Microcline, intermediate Coefficient Y61m Refinement Flag:

- Old Value = "False"
- Modification time = "8/19/2021 7:35:14 AM"
- Modification editor = "Sandeep Nagar"

Change Microcline, intermediate Coefficient Y62p Refinement Flag:

- Old Value = "False"
- Modification time = "8/19/2021 7:35:14 AM"
- Modification editor = "Sandeep Nagar"

Change Microcline, intermediate Coefficient Y62m Refinement Flag:

- Old Value = "False"
- Modification time = "8/19/2021 7:35:15 AM"
- Modification editor = "Sandeep Nagar"

Change Microcline, intermediate Coefficient Y63p Refinement Flag:

- Old Value = "False"

- Modification time = "8/19/2021 7:35:16 AM"
- Modification editor = "Sandeep Nagar"

Change Microcline, intermediate Coefficient Y63m Refinement Flag:

- Old Value = "False"
- Modification time = "8/19/2021 7:35:16 AM"
- Modification editor = "Sandeep Nagar"

Change Microcline, intermediate Coefficient Y64p Refinement Flag:

- Old Value = "False"
- Modification time = "8/19/2021 7:35:17 AM"
- Modification editor = "Sandeep Nagar"

Change Microcline, intermediate Coefficient Y64m Refinement Flag:

- Old Value = "False"
- Modification time = "8/19/2021 7:35:18 AM"
- Modification editor = "Sandeep Nagar"

Change Microcline, intermediate Coefficient Y65p Refinement Flag:

- Old Value = "False"
- Modification time = "8/19/2021 7:35:19 AM"
- Modification editor = "Sandeep Nagar"

Change Microcline, intermediate Coefficient Y65m Refinement Flag:

- Old Value = "False"
- Modification time = "8/19/2021 7:35:21 AM"
- Modification editor = "Sandeep Nagar"

Change Microcline, intermediate Coefficient Y66p Refinement Flag:

- Old Value = "False"
- Modification time = "8/19/2021 7:35:22 AM"
- Modification editor = "Sandeep Nagar"

Change Microcline, intermediate Coefficient Y66m Refinement Flag:

- Old Value = "False"
- Modification time = "8/19/2021 7:35:23 AM"
- Modification editor = "Sandeep Nagar"

Profile/Rietveld fitting:

- Angular range Gonio = "5.278 - 69.992"
- Refinement Mode = "Manual"
- No. of refined parameters = "117"

- Chi Square = "1.16671320109024"
- Rp = "0.06765"
- Rwp = "0.09011"
- Rexp = "0.07724"
- Modification time = "8/19/2021 7:35:41 AM"
- Modification editor = "Sandeep Nagar"

## Edit Annite-siderophyllite Preferred Orientation Model:

- Old Value = "March/Dollase Model"
- Modification time = "8/19/2021 7:35:59 AM"
- Modification editor = "Sandeep Nagar"

## Change Annite-siderophyllite Coefficient Y20 Refinement Flag:

- Old Value = "False"
- Modification time = "8/19/2021 7:36:02 AM"
- Modification editor = "Sandeep Nagar"

## Change Annite-siderophyllite Coefficient Y22p Refinement Flag:

- Old Value = "False"
- Modification time = "8/19/2021 7:36:03 AM"
- Modification editor = "Sandeep Nagar"

## Change Annite-siderophyllite Coefficient Y22m Refinement Flag:

- Old Value = "False"
- Modification time = "8/19/2021 7:36:04 AM"
- Modification editor = "Sandeep Nagar"

## Change Annite-siderophyllite Coefficient Y40 Refinement Flag:

- Old Value = "False"
- Modification time = "8/19/2021 7:36:04 AM"
- Modification editor = "Sandeep Nagar"

## Change Annite-siderophyllite Coefficient Y42p Refinement Flag:

- Old Value = "False"
- Modification time = "8/19/2021 7:36:05 AM"
- Modification editor = "Sandeep Nagar"

## Change Annite-siderophyllite Coefficient Y42m Refinement Flag:

- Old Value = "False"
- Modification time = "8/19/2021 7:36:09 AM"
- Modification editor = "Sandeep Nagar"



Change Annite-siderophyllite Coefficient Y44p Refinement Flag:

- Old Value = "False"
- Modification time = "8/19/2021 7:36:10 AM"
- Modification editor = "Sandeep Nagar"

Change Annite-siderophyllite Coefficient Y44m Refinement Flag:

- Old Value = "False"
- Modification time = "8/19/2021 7:36:10 AM"
- Modification editor = "Sandeep Nagar"

Change Annite-siderophyllite Coefficient Y60 Refinement Flag:

- Old Value = "False"
- Modification time = "8/19/2021 7:36:11 AM"
- Modification editor = "Sandeep Nagar"

Change Annite-siderophyllite Coefficient Y62p Refinement Flag:

- Old Value = "False"
- Modification time = "8/19/2021 7:36:12 AM"
- Modification editor = "Sandeep Nagar"

Change Annite-siderophyllite Coefficient Y62m Refinement Flag:

- Old Value = "False"
- Modification time = "8/19/2021 7:36:13 AM"
- Modification editor = "Sandeep Nagar"

Change Annite-siderophyllite Coefficient Y64p Refinement Flag:

- Old Value = "False"
- Modification time = "8/19/2021 7:36:13 AM"
- Modification editor = "Sandeep Nagar"

Change Annite-siderophyllite Coefficient Y64m Refinement Flag:

- Old Value = "False"
- Modification time = "8/19/2021 7:36:14 AM"
- Modification editor = "Sandeep Nagar"

Change Annite-siderophyllite Coefficient Y66p Refinement Flag:

- Old Value = "False"
- Modification time = "8/19/2021 7:36:14 AM"
- Modification editor = "Sandeep Nagar"

Change Annite-siderophyllite Coefficient Y66m Refinement Flag:

- Old Value = "False"

- Modification time = "8/19/2021 7:36:17 AM"
- Modification editor = "Sandeep Nagar"

## Profile/Rietveld fitting:

- Angular range Gonio = "5.278 - 69.992"
- Refinement Mode = "Manual"
- No. of refined parameters = "132"
- Chi Square = "1.1610419981818"
- Rp = "0.06717"
- Rwp = "0.08954"
- Rexp = "0.07712"
- Modification time = "8/19/2021 7:36:30 AM"
- Modification editor = "Sandeep Nagar"

## Edit Anorthite, sodian Preferred Orientation Model:

- Old Value = "March/Dollase Model"
- Modification time = "8/19/2021 7:36:38 AM"
- Modification editor = "Sandeep Nagar"

## Change Anorthite, sodian Coefficient Y20 Refinement Flag:

- Old Value = "False"
- Modification time = "8/19/2021 7:36:42 AM"
- Modification editor = "Sandeep Nagar"

## Change Anorthite, sodian Coefficient Y21p Refinement Flag:

- Old Value = "False"
- Modification time = "8/19/2021 7:36:42 AM"
- Modification editor = "Sandeep Nagar"

## Change Anorthite, sodian Coefficient Y21m Refinement Flag:

- Old Value = "False"
- Modification time = "8/19/2021 7:36:43 AM"
- Modification editor = "Sandeep Nagar"

## Change Anorthite, sodian Coefficient Y22p Refinement Flag:

- Old Value = "False"
- Modification time = "8/19/2021 7:36:43 AM"
- Modification editor = "Sandeep Nagar"

## Change Anorthite, sodian Coefficient Y22m Refinement Flag:

- Old Value = "False"
- Modification time = "8/19/2021 7:36:46 AM"

- Modification editor = "Sandeep Nagar"

Change Anorthite, sodian Coefficient Y40 Refinement Flag:

- Old Value = "False"
- Modification time = "8/19/2021 7:36:47 AM"
- Modification editor = "Sandeep Nagar"

Change Anorthite, sodian Coefficient Y41p Refinement Flag:

- Old Value = "False"
- Modification time = "8/19/2021 7:36:47 AM"
- Modification editor = "Sandeep Nagar"

Change Anorthite, sodian Coefficient Y41m Refinement Flag:

- Old Value = "False"
- Modification time = "8/19/2021 7:36:48 AM"
- Modification editor = "Sandeep Nagar"

Change Anorthite, sodian Coefficient Y42p Refinement Flag:

- Old Value = "False"
- Modification time = "8/19/2021 7:36:48 AM"
- Modification editor = "Sandeep Nagar"

Change Anorthite, sodian Coefficient Y42m Refinement Flag:

- Old Value = "False"
- Modification time = "8/19/2021 7:36:49 AM"
- Modification editor = "Sandeep Nagar"

Change Anorthite, sodian Coefficient Y43p Refinement Flag:

- Old Value = "False"
- Modification time = "8/19/2021 7:36:49 AM"
- Modification editor = "Sandeep Nagar"

Change Anorthite, sodian Coefficient Y43m Refinement Flag:

- Old Value = "False"
- Modification time = "8/19/2021 7:36:50 AM"
- Modification editor = "Sandeep Nagar"

Profile/Rietveld fitting:

- Angular range Gonio = "5.278 - 69.992"
- Refinement Mode = "Manual"
- No. of refined parameters = "144"
- Chi Square = "1.15582182555383"

- Rp = "0.06672"
- Rwp = "0.08903"
- Rexp = "0.07702"
- Modification time = "8/19/2021 7:37:04 AM"
- Modification editor = "Sandeep Nagar"

## Edit Ferromerrillite Preferred Orientation Model:

- Old Value = "March/Dollase Model"
- Modification time = "8/19/2021 7:37:21 AM"
- Modification editor = "Sandeep Nagar"

## Change Ferromerrillite Coefficient Y20 Refinement Flag:

- Old Value = "False"
- Modification time = "8/19/2021 7:37:25 AM"
- Modification editor = "Sandeep Nagar"

## Change Ferromerrillite Coefficient Y40 Refinement Flag:

- Old Value = "False"
- Modification time = "8/19/2021 7:37:25 AM"
- Modification editor = "Sandeep Nagar"

## Change Ferromerrillite Coefficient Y43p Refinement Flag:

- Old Value = "False"
- Modification time = "8/19/2021 7:37:26 AM"
- Modification editor = "Sandeep Nagar"

## Change Ferromerrillite Coefficient Y60 Refinement Flag:

- Old Value = "False"
- Modification time = "8/19/2021 7:37:29 AM"
- Modification editor = "Sandeep Nagar"

## Change Ferromerrillite Coefficient Y63p Refinement Flag:

- Old Value = "False"
- Modification time = "8/19/2021 7:37:29 AM"
- Modification editor = "Sandeep Nagar"

## Change Ferromerrillite Coefficient Y66p Refinement Flag:

- Old Value = "False"
- Modification time = "8/19/2021 7:37:30 AM"
- Modification editor = "Sandeep Nagar"

## Profile/Rietveld fitting:

- Angular range Gonio = "5.278 - 69.992"
- Refinement Mode = "Manual"
- No. of refined parameters = "150"
- Chi Square = "1.14978473936602"
- Rp = "0.06633"
- Rwp = "0.08851"
- Rexp = "0.07698"
- Modification time = "8/19/2021 7:37:42 AM"
- Modification editor = "Sandeep Nagar"

## Edit Greenalite Preferred Orientation Model:

- Old Value = "March/Dollase Model"
- Modification time = "8/19/2021 7:37:50 AM"
- Modification editor = "Sandeep Nagar"

## Change Greenalite Coefficient Y20 Refinement Flag:

- Old Value = "False"
- Modification time = "8/19/2021 7:37:55 AM"
- Modification editor = "Sandeep Nagar"

## Change Greenalite Coefficient Y22p Refinement Flag:

- Old Value = "False"
- Modification time = "8/19/2021 7:37:55 AM"
- Modification editor = "Sandeep Nagar"

## Change Greenalite Coefficient Y22m Refinement Flag:

- Old Value = "False"
- Modification time = "8/19/2021 7:37:56 AM"
- Modification editor = "Sandeep Nagar"

## Change Greenalite Coefficient Y40 Refinement Flag:

- Old Value = "False"
- Modification time = "8/19/2021 7:37:57 AM"
- Modification editor = "Sandeep Nagar"

## Change Greenalite Coefficient Y42p Refinement Flag:

- Old Value = "False"
- Modification time = "8/19/2021 7:37:57 AM"
- Modification editor = "Sandeep Nagar"

## Change Greenalite Coefficient Y42m Refinement Flag:

- Old Value = "False"

- Modification time = "8/19/2021 7:37:58 AM"
- Modification editor = "Sandeep Nagar"

Change Greenalite Coefficient Y44p Refinement Flag:

- Old Value = "False"
- Modification time = "8/19/2021 7:37:59 AM"
- Modification editor = "Sandeep Nagar"

Change Greenalite Coefficient Y44m Refinement Flag:

- Old Value = "False"
- Modification time = "8/19/2021 7:38:00 AM"
- Modification editor = "Sandeep Nagar"

Change Greenalite Coefficient Y60 Refinement Flag:

- Old Value = "False"
- Modification time = "8/19/2021 7:38:00 AM"
- Modification editor = "Sandeep Nagar"

Change Greenalite Coefficient Y62p Refinement Flag:

- Old Value = "False"
- Modification time = "8/19/2021 7:38:01 AM"
- Modification editor = "Sandeep Nagar"

Change Greenalite Coefficient Y62m Refinement Flag:

- Old Value = "False"
- Modification time = "8/19/2021 7:38:04 AM"
- Modification editor = "Sandeep Nagar"

Change Greenalite Coefficient Y64p Refinement Flag:

- Old Value = "False"
- Modification time = "8/19/2021 7:38:05 AM"
- Modification editor = "Sandeep Nagar"

Change Greenalite Coefficient Y64m Refinement Flag:

- Old Value = "False"
- Modification time = "8/19/2021 7:38:05 AM"
- Modification editor = "Sandeep Nagar"

Change Greenalite Coefficient Y66p Refinement Flag:

- Old Value = "False"
- Modification time = "8/19/2021 7:38:06 AM"
- Modification editor = "Sandeep Nagar"

## Change Greenalite Coefficient Y66m Refinement Flag:

- Old Value = "False"
- Modification time = "8/19/2021 7:38:07 AM"
- Modification editor = "Sandeep Nagar"

## Profile/Rietveld fitting:

- Angular range Gonio = "5.278 - 69.992"
- Refinement Mode = "Manual"
- No. of refined parameters = "165"
- Chi Square = "1.11020168590623"
- Rp = "0.06395"
- Rwp = "0.08533"
- Rexp = "0.07686"
- Modification time = "8/19/2021 7:38:21 AM"
- Modification editor = "Sandeep Nagar"

## Change Ferromerrillite Use Flag:

- Old Value = "True"
- Modification time = "25-08-2021 18:45:02"
- Modification editor = "mangesh.mahajan"

## Change Greenalite Use Flag:

- Old Value = "True"
- Modification time = "25-08-2021 18:45:02"
- Modification editor = "mangesh.mahajan"

## Profile/Rietveld fitting:

- Angular range Gonio = "5.278 - 69.992"
- Refinement Mode = "Manual"
- No. of refined parameters = "142"
- Chi Square = "1.1633276122015"
- Rp = "0.06623"
- Rwp = "0.08962"
- Rexp = "0.07704"
- Modification time = "25-08-2021 18:45:11"
- Modification editor = "mangesh.mahajan"

## Insert Measurement:

- File name = "rv-dthR.xrdml"
- Modification time = "26-08-2021 13:49:06"
- Modification editor = "mangesh.mahajan"

## Default properties:

- Measurement step axis = "None"
- Internal wavelengths used from anode material: Copper (Cu)
- Original K-Alpha1 wavelength = "1.54060"
- Used K-Alpha1 wavelength = "1.54060"
- Original K-Alpha2 wavelength = "1.54443"
- Used K-Alpha2 wavelength = "1.54443"
- Original K-Beta wavelength = "1.39225"
- Used K-Beta wavelength = "1.39225"
- Irradiated length = "10.00000"
- Spinner used = "No"
- KBeta filter material = "Ni"
- KBeta filter thickness = "0.02000"
- Receiving slit size = "0.10000"
- Step axis value = "0.00000"
- Offset = "0.00000"
- Sample length = "10.00000"
- Modification time = "26-08-2021 13:49:06"
- Modification editor = "mangesh.mahajan"

## Interpolate Step Size:

- Initial Scan Range = 3.00657 - 69.99730
- Initial Step Size = 0.01313
- Derived Step Size = 0.01300
- Use Derived Step Size = "Yes"
- Parameterset name = "Default"
- PANalytical factory default
- Modification time = "26-08-2021 13:49:06"
- Modification editor = "mangesh.mahajan"

## Clip Range:

- Old/New start = "3.0066/4.0000"
- Old/New end = "69.9956/69.9956"
- Modification time = "26-08-2021 20:28:04"
- Modification editor = "mangesh.mahajan"

## Delete Selected Phase:

- Modification time = "26-08-2021 20:37:38"
- Modification editor = "mangesh.mahajan"

## Delete Selected Phase:



- Modification time = "26-08-2021 20:37:43"
- Modification editor = "mangesh.mahajan"

## Profile/Rietveld fitting:

- Angular range Gonio = 4.008 - 69.996
- Step No. 1
- Title = "Scale Factor"
- Switch off after usage = "No"
- Step No. 2
- Title = "Flat Background"
- Switch off after usage = "No"
- Step No. 3
- Title = "More background"
- Switch off after usage = "No"
- No. additional parameters = "3"
- Use 1/X background too = "Yes"
- Step No. 4
- Title = "Specimen Displacement"
- Switch off after usage = "No"
- Step No. 5
- Title = "Lattice Parameters"
- Switch off after usage = "No"
- Minimum weight % = "5"
- No. of refined parameters = 31
- Chi Square = 2.05351972904851
- Rp = 0.10323
- Rwp = 0.13555
- Rexp = 0.06601
- Modification time = "26-08-2021 20:38:53"
- Modification editor = "mangesh.mahajan"

## Profile/Rietveld fitting:

- Angular range Gonio = 4.008 - 69.996
- Step No. 1
- Title = "Scale Factor"
- Switch off after usage = "No"
- Step No. 2
- Title = "Flat Background"
- Switch off after usage = "No"
- Step No. 3
- Title = "More background"
- Switch off after usage = "No"

- No. additional parameters = "3"
- Use 1/X background too = "Yes"
- Step No. 4
- Title = "Specimen Displacement"
- Switch off after usage = "No"
- Step No. 5
- Title = "Lattice Parameters"
- Switch off after usage = "No"
- Minimum weight % = "5"
- Step No. 6
- Title = "Caglioti W"
- Switch off after usage = "No"
- Minimum weight % = "5"
- Step No. 7
- Title = "Preferred Orientation"
- Switch off after usage = "No"
- Minimum weight % = "15"
- Toggle directions = "No"
- Step No. 8
- Title = "Caglioti U"
- Switch off after usage = "No"
- Minimum weight % = "15"
- Step No. 9
- Title = "Caglioti V"
- Switch off after usage = "No"
- Minimum weight % = "15"
- Step No. 10
- Title = "Peak Shape Parameter 1"
- Switch off after usage = "No"
- Minimum weight % = "20"
- No. of refined parameters = 82
- Chi Square = 1.71999569666898
- Rp = 0.08210
- Rwp = 0.11296
- Rexp = 0.06567
- Modification time = "26-08-2021 20:39:28"
- Modification editor = "mangesh.mahajan"

Delete Selected Phase:

- Modification time = "26-08-2021 21:32:01"
- Modification editor = "mangesh.mahajan"

Insert Phase: Muscovite 2M1:

- Modification time = "26-08-2021 21:34:12"
- Modification editor = "mangesh.mahajan"

Insert Phase: Birnessite:

- Modification time = "26-08-2021 21:34:18"
- Modification editor = "mangesh.mahajan"

Edit Anorthite, sodian Display Color:

- Old Value = "Aqua"
- Modification time = "26-08-2021 21:34:28"
- Modification editor = "mangesh.mahajan"

Fix all parameters:

- Modification time = "26-08-2021 21:34:39"
- Modification editor = "mangesh.mahajan"

Initialize Global Parameters:

- Modification time = "26-08-2021 21:34:42"
- Modification editor = "mangesh.mahajan"

Initialize All Phases:

- Modification time = "26-08-2021 21:34:46"
- Modification editor = "mangesh.mahajan"

Edit Muscovite 2M1 Spherical Harmonics Order:

- Old Value = "6"
- Modification time = "26-08-2021 21:35:13"
- Modification editor = "mangesh.mahajan"

Edit Muscovite 2M1 Spherical Harmonics Order:

- Old Value = "8"
- Modification time = "26-08-2021 21:35:16"
- Modification editor = "mangesh.mahajan"

Edit Birnessite Spherical Harmonics Order:

- Old Value = "6"
- Modification time = "26-08-2021 21:35:33"
- Modification editor = "mangesh.mahajan"

Edit Birnessite Spherical Harmonics Order:

- Old Value = "8"

- Modification time = "26-08-2021 21:35:36"
- Modification editor = "mangesh.mahajan"

## Profile/Rietveld fitting:

- Angular range Gonio = 4.008 - 69.996
- Step No. 1
- Title = "Scale Factor"
- Switch off after usage = "No"
- Step No. 2
- Title = "Flat Background"
- Switch off after usage = "No"
- Step No. 3
- Title = "More background"
- Switch off after usage = "No"
- No. additional parameters = "3"
- Use 1/X background too = "Yes"
- Step No. 4
- Title = "Specimen Displacement"
- Switch off after usage = "No"
- Step No. 5
- Title = "Lattice Parameters"
- Switch off after usage = "No"
- Minimum weight % = "5"
- No. of refined parameters = 32
- Chi Square = 2.31670692402768
- Rp = 0.11370
- Rwp = 0.15290
- Rexp = 0.06600
- Modification time = "26-08-2021 21:36:21"
- Modification editor = "mangesh.mahajan"

## Profile/Rietveld fitting:

- Angular range Gonio = 4.008 - 69.996
- Step No. 1
- Title = "Scale Factor"
- Switch off after usage = "No"
- Step No. 2
- Title = "Flat Background"
- Switch off after usage = "No"
- Step No. 3
- Title = "More background"
- Switch off after usage = "No"

- No. additional parameters = "3"
- Use 1/X background too = "Yes"
- Step No. 4
- Title = "Specimen Displacement"
- Switch off after usage = "No"
- Step No. 5
- Title = "Lattice Parameters"
- Switch off after usage = "No"
- Minimum weight % = "5"
- Step No. 6
- Title = "Caglioti W"
- Switch off after usage = "No"
- Minimum weight % = "5"
- Step No. 7
- Title = "Preferred Orientation"
- Switch off after usage = "No"
- Minimum weight % = "15"
- Toggle directions = "No"
- Step No. 8
- Title = "Caglioti U"
- Switch off after usage = "No"
- Minimum weight % = "15"
- Step No. 9
- Title = "Caglioti V"
- Switch off after usage = "No"
- Minimum weight % = "15"
- Step No. 10
- Title = "Peak Shape Parameter 1"
- Switch off after usage = "No"
- Minimum weight % = "20"
- No. of refined parameters = 83
- Chi Square = 1.78327458434042
- Rp = 0.08518
- Rwp = 0.11710
- Rexp = 0.06567
- Modification time = "26-08-2021 21:36:50"
- Modification editor = "mangesh.mahajan"

## Profile/Rietveld fitting:

- Angular range Gonio = "4.008 - 69.996"
- Refinement Mode = "Manual"
- No. of refined parameters = "110"

- Chi Square = "1.72053549553991"
- Rp = "0.08177"
- Rwp = "0.11267"
- Rexp = "0.06549"
- Modification time = "26-08-2021 21:37:17"
- Modification editor = "mangesh.mahajan"

## Change Muscovite 2M1 Profile Caglioti W Left Refinement Flag:

- Old Value = "False"
- Modification time = "26-08-2021 21:37:25"
- Modification editor = "mangesh.mahajan"

## Profile/Rietveld fitting:

- Angular range Gonio = "4.008 - 69.996"
- Refinement Mode = "Manual"
- No. of refined parameters = "111"
- Chi Square = "1.70182529133982"
- Rp = "0.08082"
- Rwp = "0.11144"
- Rexp = "0.06548"
- Modification time = "26-08-2021 21:37:30"
- Modification editor = "mangesh.mahajan"

## Change Birnessite Profile Caglioti W Left Refinement Flag:

- Old Value = "False"
- Modification time = "26-08-2021 21:37:43"
- Modification editor = "mangesh.mahajan"

## Profile/Rietveld fitting:

- Angular range Gonio = "4.008 - 69.996"
- Refinement Mode = "Manual"
- No. of refined parameters = "112"
- Chi Square = "1.68123932606876"
- Rp = "0.07977"
- Rwp = "0.11008"
- Rexp = "0.06547"
- Modification time = "26-08-2021 21:37:48"
- Modification editor = "mangesh.mahajan"

## Change Birnessite Cell a [Å] Refinement Flag:

- Old Value = "False"
- Modification time = "26-08-2021 21:37:57"

- Modification editor = "mangesh.mahajan"

Change Birnessite Cell c [Å] Refinement Flag:

- Old Value = "False"

- Modification time = "26-08-2021 21:37:58"

- Modification editor = "mangesh.mahajan"

Change Muscovite 2M1 Profile Caglioti W Left Refinement Flag:

- Old Value = "True"

- Modification time = "26-08-2021 21:38:29"

- Modification editor = "mangesh.mahajan"

Change Muscovite 2M1 Cell a [Å] Refinement Flag:

- Old Value = "False"

- Modification time = "26-08-2021 21:38:35"

- Modification editor = "mangesh.mahajan"

Change Muscovite 2M1 Cell b [Å] Refinement Flag:

- Old Value = "False"

- Modification time = "26-08-2021 21:38:36"

- Modification editor = "mangesh.mahajan"

Change Muscovite 2M1 Cell c [Å] Refinement Flag:

- Old Value = "False"

- Modification time = "26-08-2021 21:38:38"

- Modification editor = "mangesh.mahajan"

Change Muscovite 2M1 Cell beta [°] Refinement Flag:

- Old Value = "False"

- Modification time = "26-08-2021 21:38:40"

- Modification editor = "mangesh.mahajan"

Profile/Rietveld fitting:

- Angular range Gonio = "4.008 - 69.996"

- Refinement Mode = "Manual"

- No. of refined parameters = "117"

- Chi Square = "1.65025803520023"

- Rp = "0.07801"

- Rwp = "0.10800"

- Rexp = "0.06544"

- Modification time = "26-08-2021 21:38:48"

- Modification editor = "mangesh.mahajan"

## Profile/Rietveld fitting:

- Angular range Gonio = "4.008 - 69.996"
- Refinement Mode = "Manual"
- No. of refined parameters = "117"
- Chi Square = "1.65549750515656"
- Rp = "0.07812"
- Rwp = "0.10834"
- Rexp = "0.06544"
- Modification time = "26-08-2021 21:40:00"
- Modification editor = "mangesh.mahajan"

## Edit Quartz, syn Title:

- Old Value = "Quartz, syn"
- Modification time = "26-08-2021 21:40:46"
- Modification editor = "mangesh.mahajan"

## Edit Microcline, intermediate Title:

- Old Value = "Microcline, intermediate"
- Modification time = "26-08-2021 21:40:54"
- Modification editor = "mangesh.mahajan"

## Edit Anorthite, sodian Title:

- Old Value = "Anorthite, sodian"
- Modification time = "26-08-2021 21:41:02"
- Modification editor = "mangesh.mahajan"

## Edit Albite (heat-treated) Title:

- Old Value = "Albite (heat-treated)"
- Modification time = "26-08-2021 21:41:10"
- Modification editor = "mangesh.mahajan"
